# Supplementary material
Source: PubMed Central journal article supplement (PMC11386801)

## Data S1. Off-target mutagenesis analysis

### A844B (gRNA1) T1 sample information

A total of 32 T1 plants derived from seven different T0 lines bearing on-target mutations were screened for off-target mutagenesis analysis. Twenty four plants were T-DNA positive (+), which constitutively expresses Cas9 nuclease, whereas eight were negative segregants (-). PCR was carried for each gDNA sample, and then four reactions were pooled (Sample pool) for Sanger sequencing. Thus, eight Sanger sequencing reactions were carried out per off-target. Fifteen CIRCLE-seq found (gRNA1-OFF1-10, 13-17) and two Cas-OFFinder predicted off-targets (gRNA1-OFF11-12) were analyzed, and there was no detectable level of mutations in 32 T1 lines. HM, homozygous; BI, biallelic; HT, heterozygous; MO, mosaic; WT, wild type; MT, *gl2* mutant.

| T0 genotype | A844B | T-DNA | T1 phenotype | Sample pool | Off-targets with mutation |      |
|-------------|-------|-------|--------------|-------------|---------------------------|------|
| (-7, -7)    | HM    | 1-4-1 | -            | MT          | Pool 1                    | None |
| (-7, -7)    | HM    | 1-4-2 | -            | WT          | Pool 2                    | None |
| (-7, -7)    | HM    | 1-4-3 | -            | WT          | Pool 3                    | None |
| (-7, -7)    | HM    | 1-4-4 | -            | WT          | Pool 4                    | None |
| (-7, -7)    | HM    | 1-4-5 | +            | MT          | Pool 5                    | None |
| (-7, -7)    | HM    | 1-4-6 | +            | MT          | Pool 6                    | None |
| (-7, -7)    | HM    | 1-4-7 | +            | MT          | Pool 7                    | None |
| (-7, -7)    | HM    | 1-4-8 | +            | MT          | Pool 8                    | None |
| (+1, +1)    | HM    | 2-5-1 | -            | WT          | Pool 1                    | None |
| (+1, +1)    | HM    | 2-5-2 | +            | WT          | Pool 2                    | None |
| (+1, +1)    | HM    | 2-5-3 | +            | WT          | Pool 3                    | None |
| (+1, +1)    | HM    | 2-5-4 | -            | WT          | Pool 4                    | None |
| (-2, -2)    | HM    | 3-2-1 | +            | MT          | Pool 5                    | None |
| (-2, -2)    | HM    | 3-2-2 | +            | MT          | Pool 6                    | None |
| (-2, -2)    | HM    | 3-2-3 | +            | MT          | Pool 7                    | None |
| (-2, -2)    | HM    | 3-2-4 | +            | MT          | Pool 8                    | None |
| (-2, -2)    | HM    | 3-4-1 | +            | MT          | Pool 1                    | None |
| (-2, -2)    | HM    | 3-4-2 | +            | MT          | Pool 2                    | None |
| (-2, -2)    | HM    | 3-4-3 | +            | MT          | Pool 3                    | None |
| (-2, -2)    | HM    | 3-4-4 | +            | MT          | Pool 4                    | None |
| (0, +1)     | HT    | 6-1-1 | +            | MT          | Pool 5                    | None |
| (0, +1)     | HT    | 6-1-2 | -            | MT          | Pool 6                    | None |
| (0, +1)     | HT    | 6-1-3 | +            | MT          | Pool 7                    | None |
| (0, +1)     | HT    | 6-1-4 | -            | MT          | Pool 8                    | None |
| (0, +1)     | HT    | 7-2-1 | +            | MT          | Pool 1                    | None |
| (0, +1)     | HT    | 7-2-2 | +            | WT          | Pool 2                    | None |
| (0, +1)     | HT    | 7-2-3 | +            | MT          | Pool 3                    | None |
| (0, +1)     | HT    | 7-2-4 | +            | MT          | Pool 4                    | None |
| (+1, -2)    | BI    | 8-2-1 | +            | MT          | Pool 5                    | None |
| (+1, -2)    | BI    | 8-2-2 | +            | MT          | Pool 6                    | None |
| (+1, -2)    | BI    | 8-2-3 | +            | MT          | Pool 7                    | None |
| (+1, -2)    | BI    | 8-2-4 | +            | MT          | Pool 8                    | None |

# gRNA1-OFF1

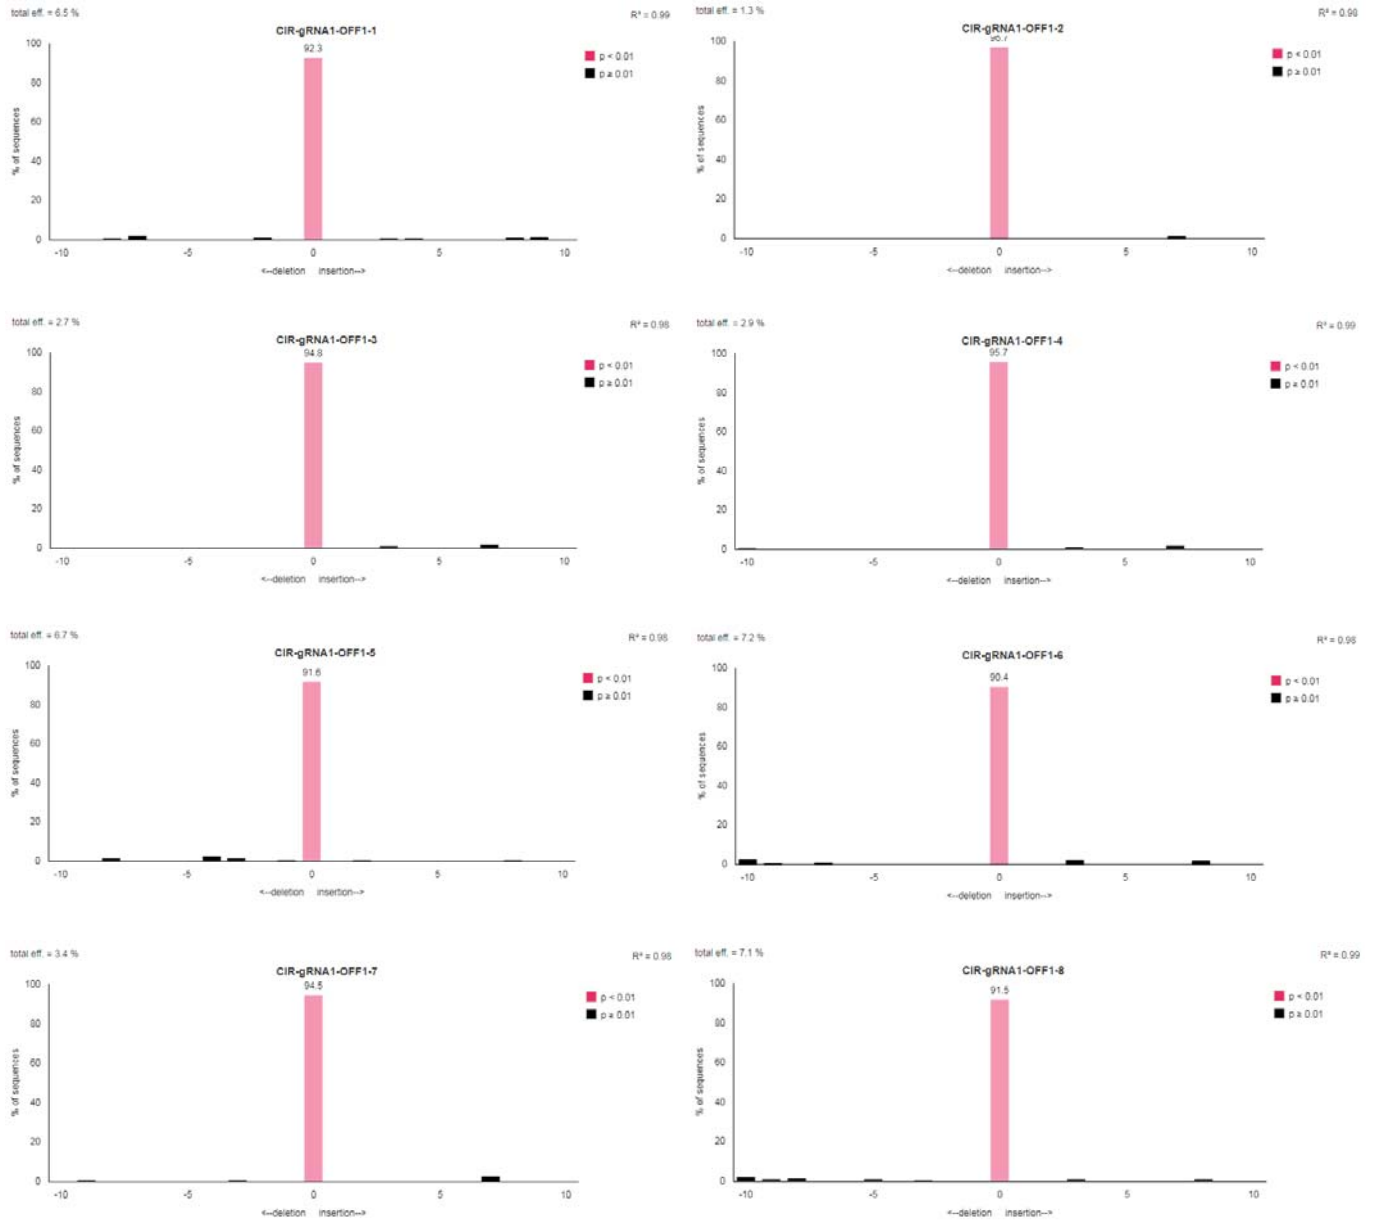

# gRNA1-OFF2

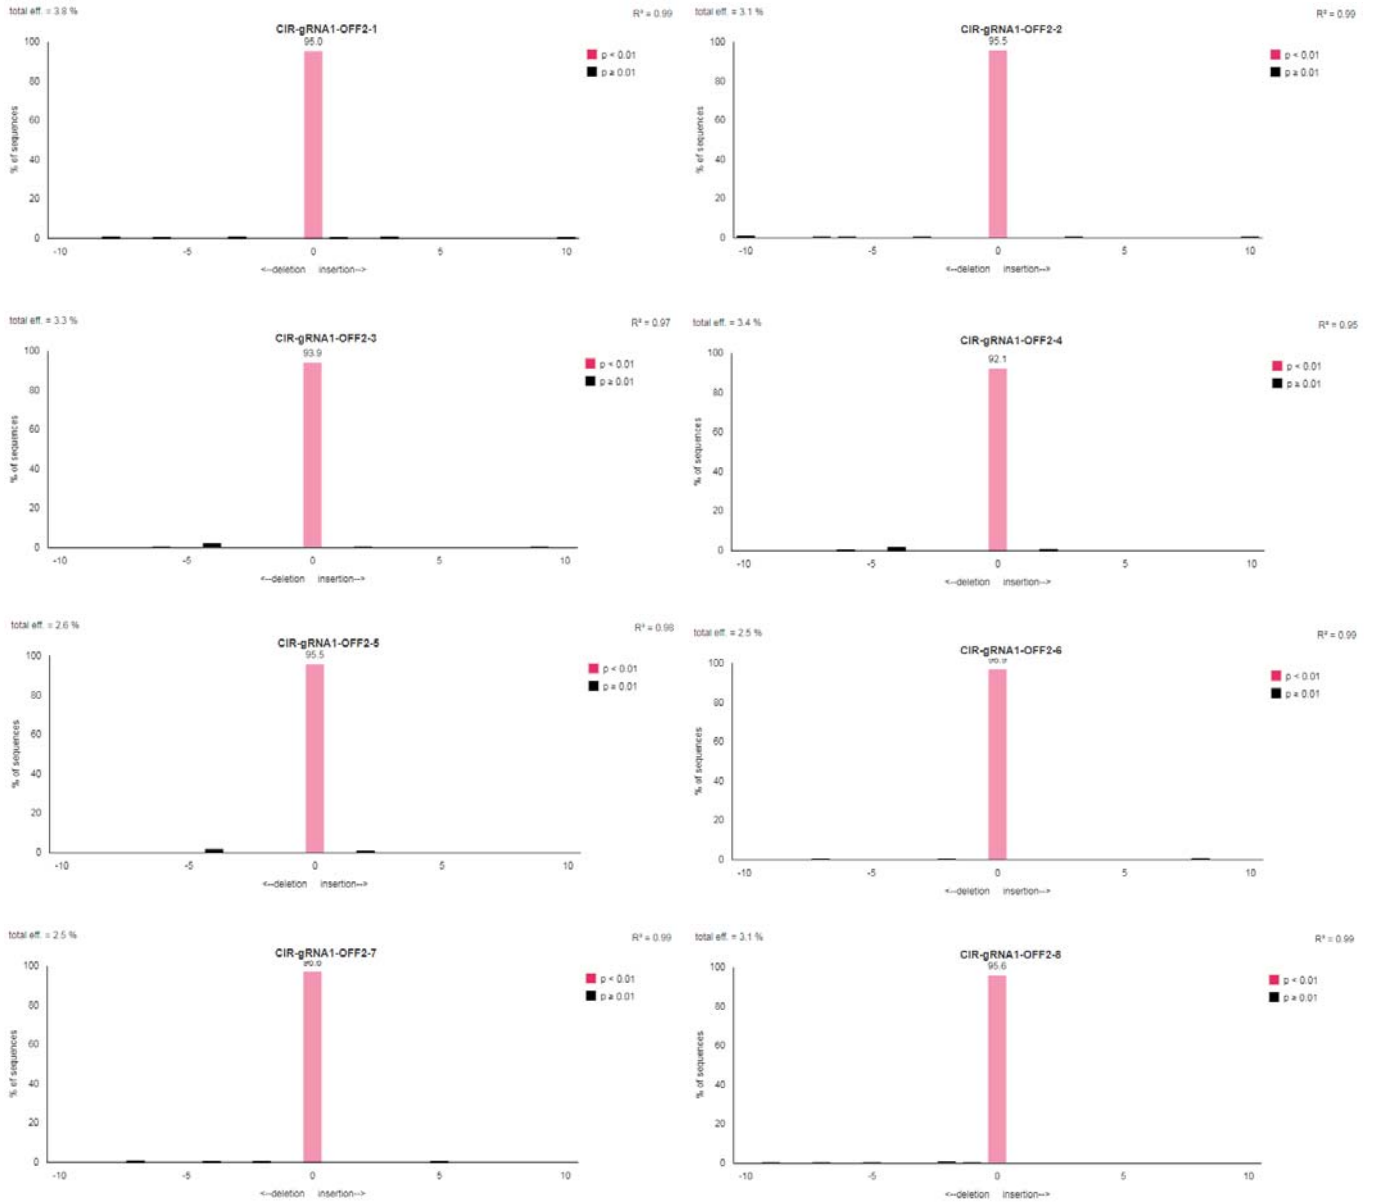

# gRNA1-OFF3

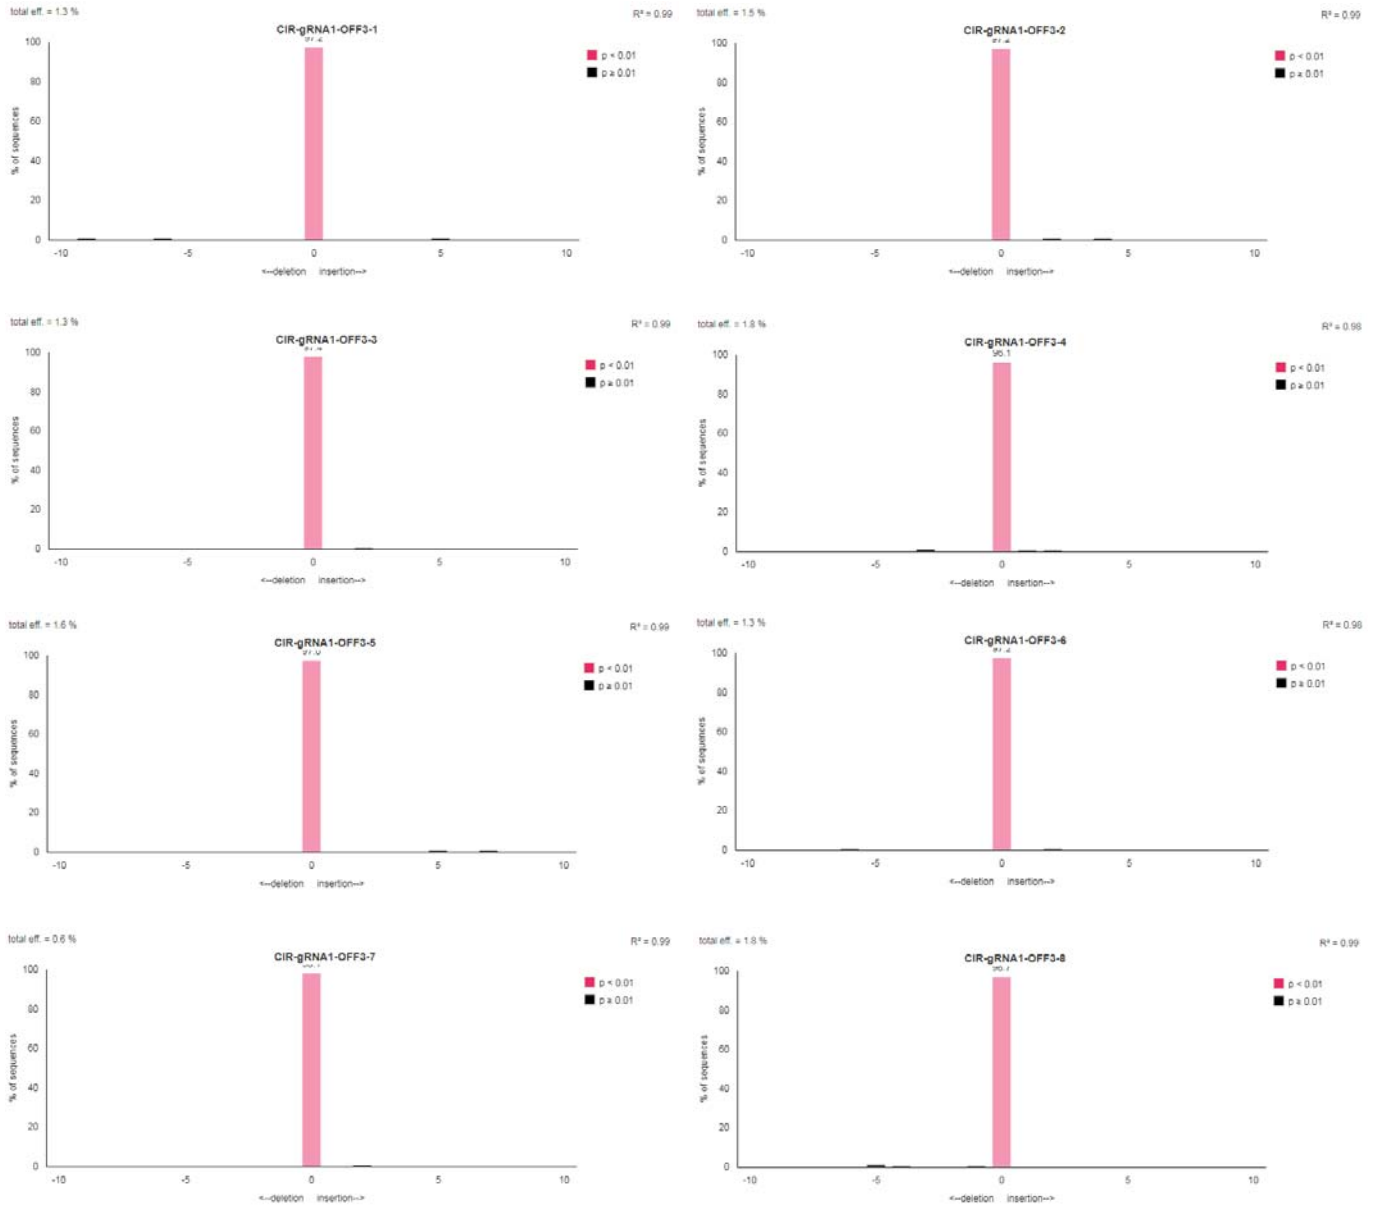

# gRNA1-OFF4

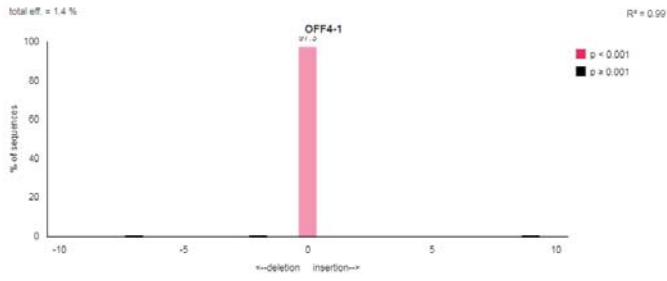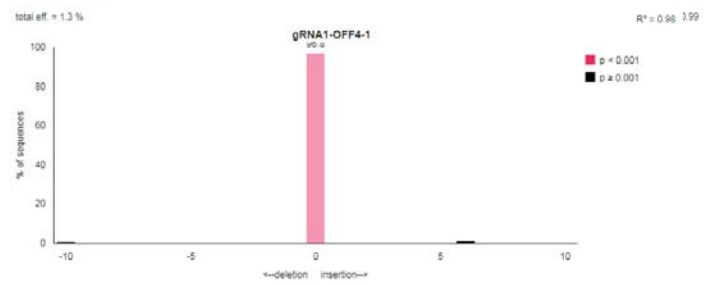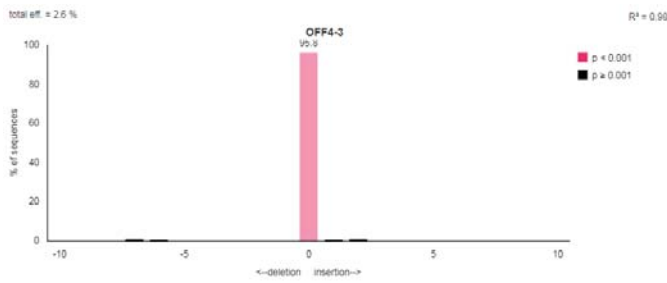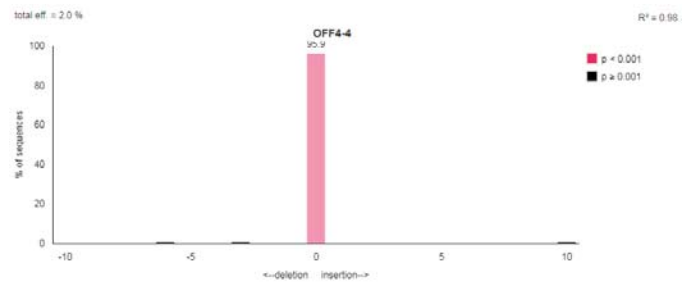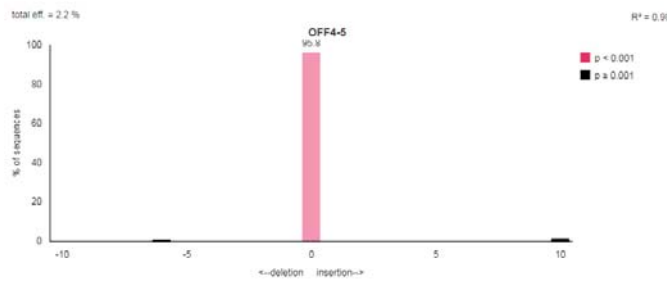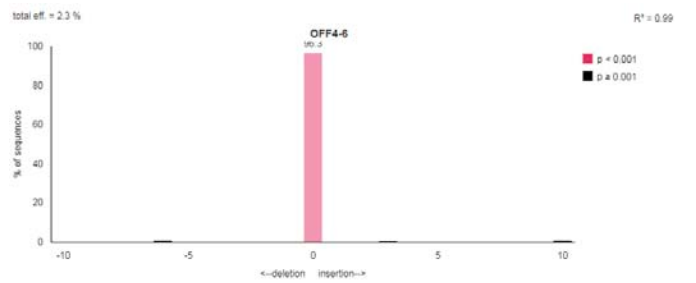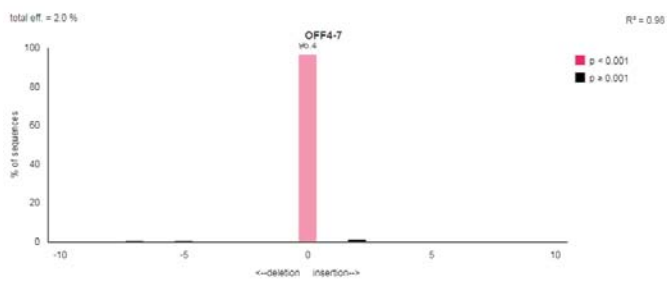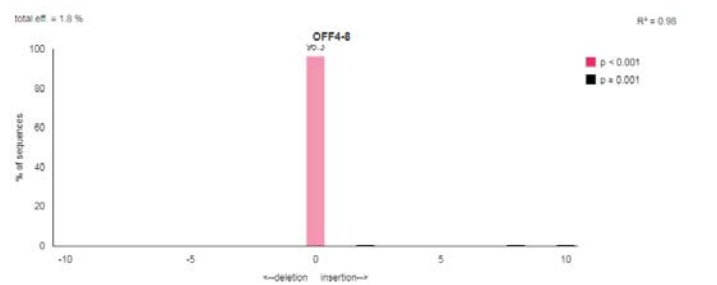

# gRNA1-OFF5

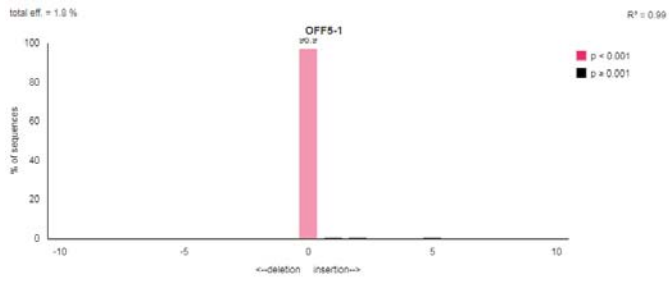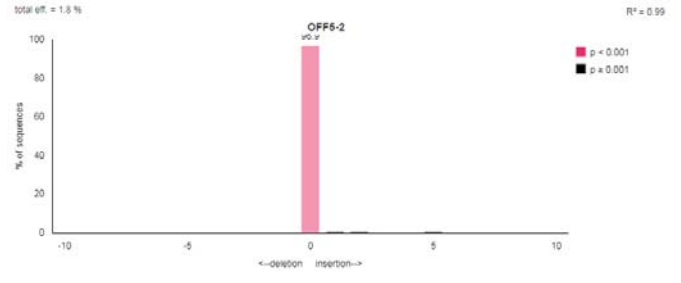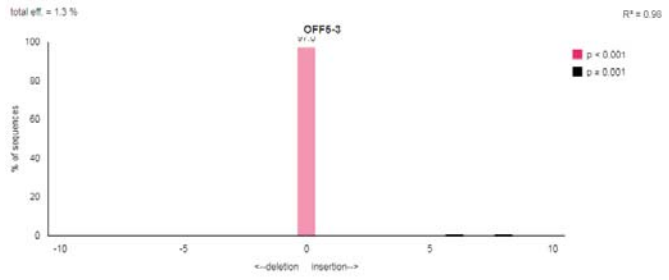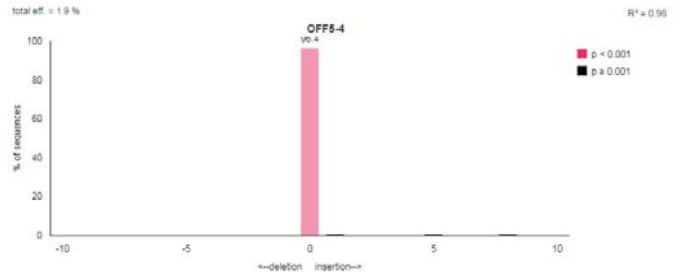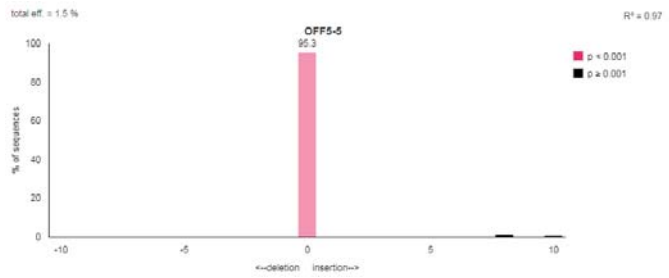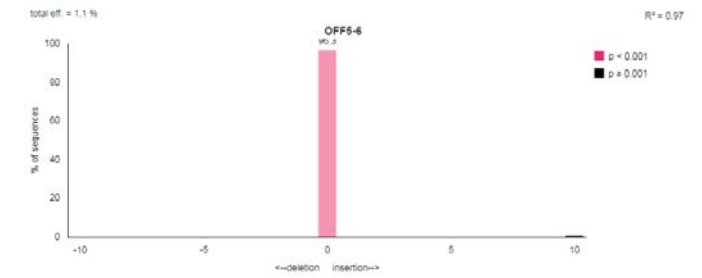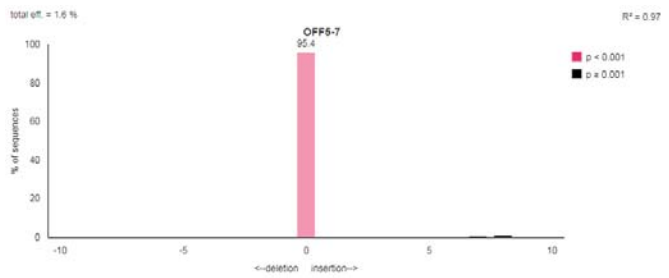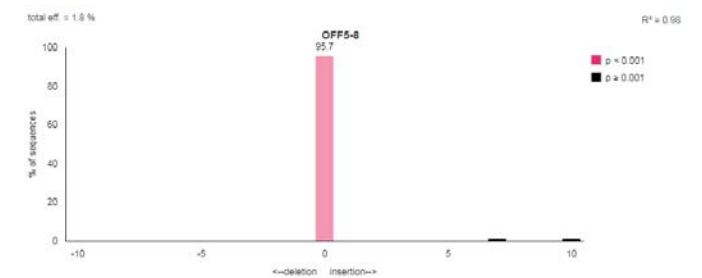

# gRNA1-OFF6

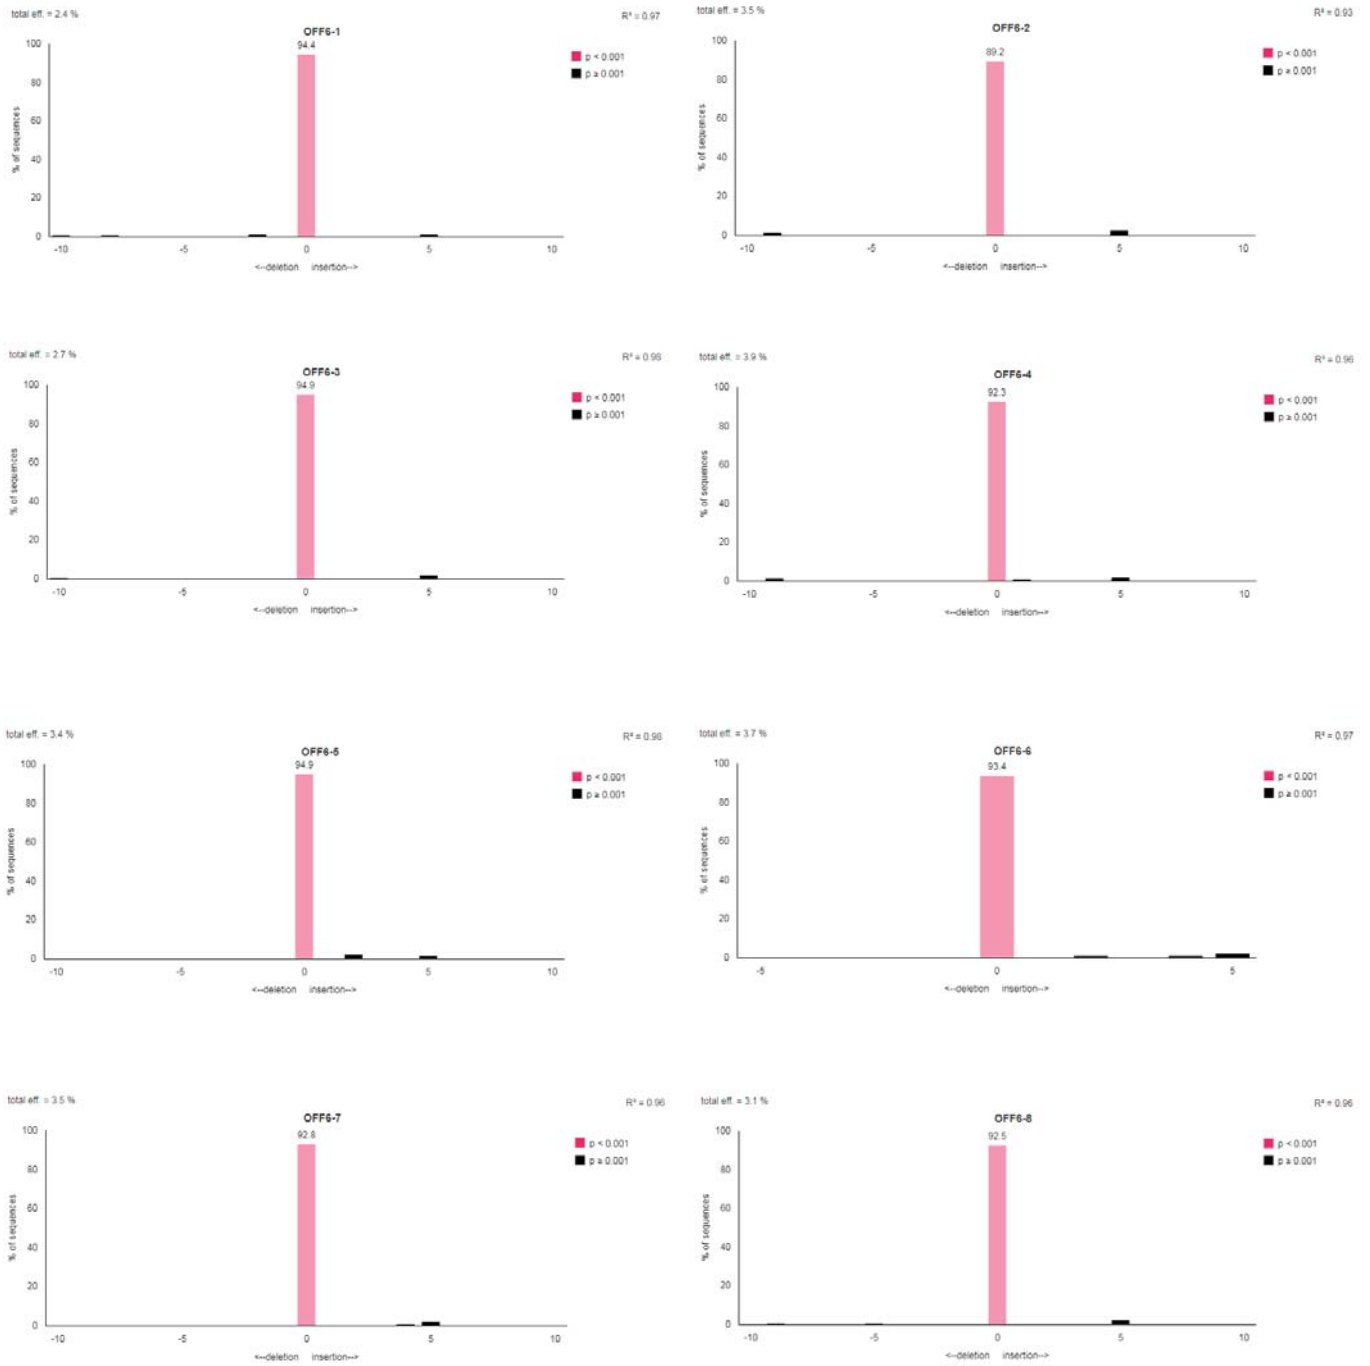

# gRNA1-OFF7

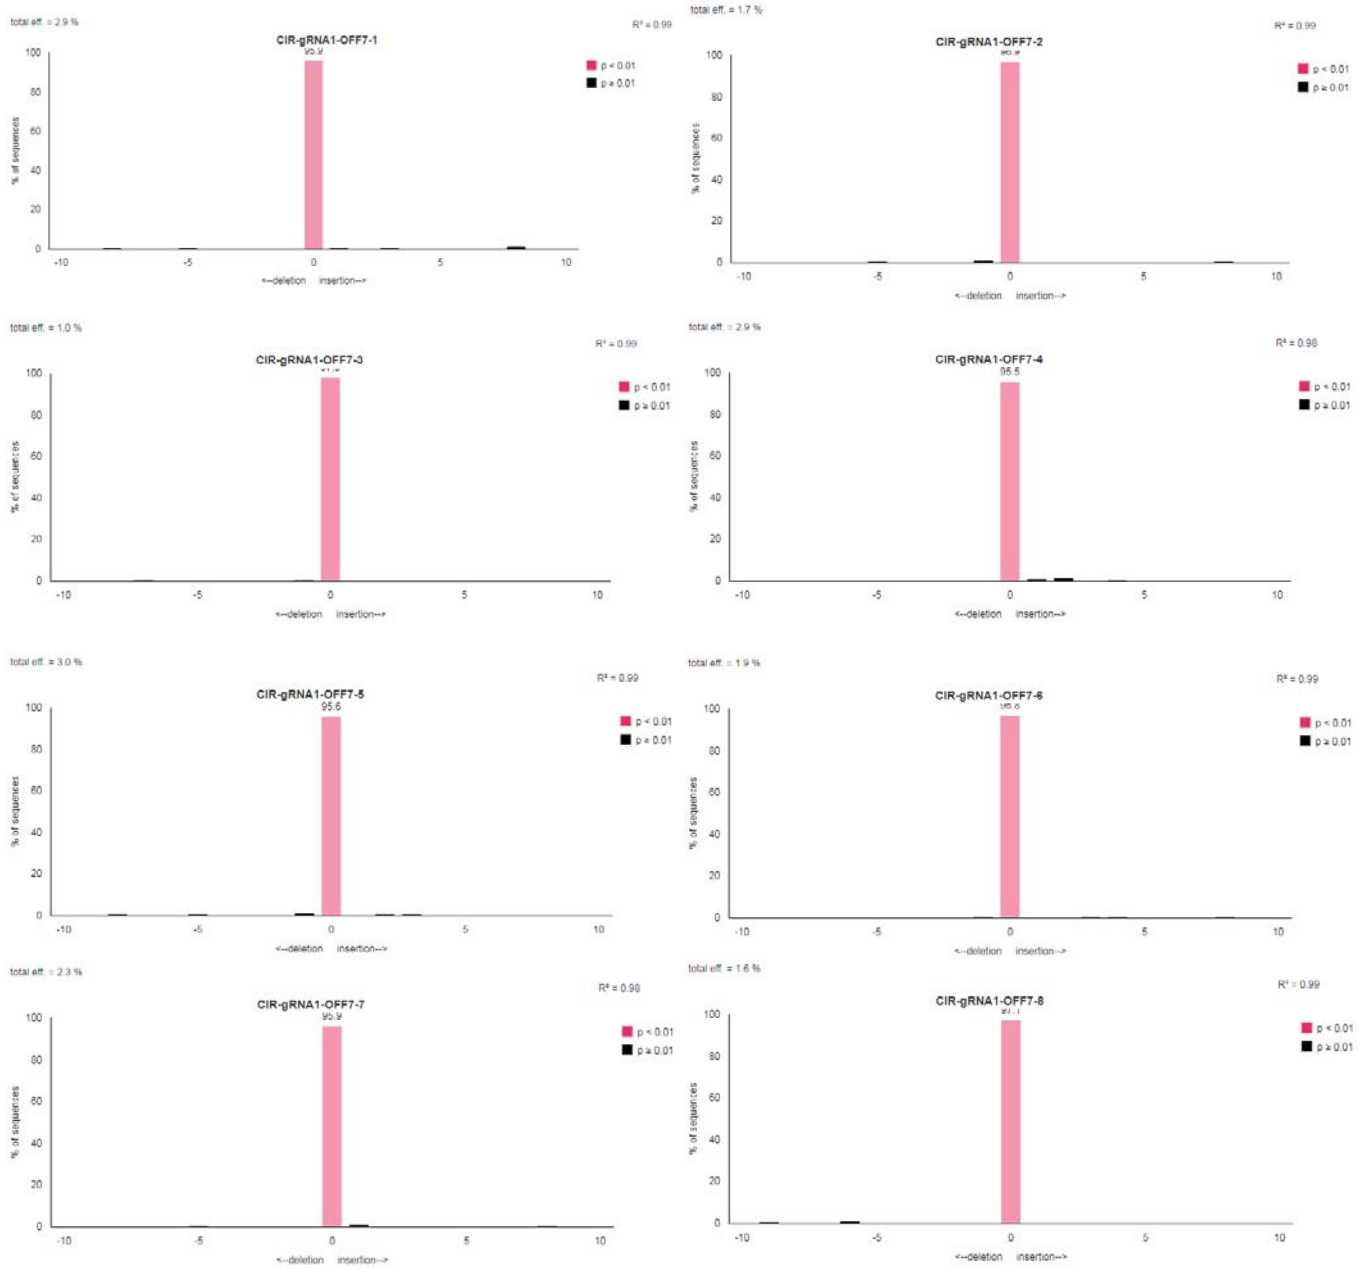



# gRNA1-OFF8

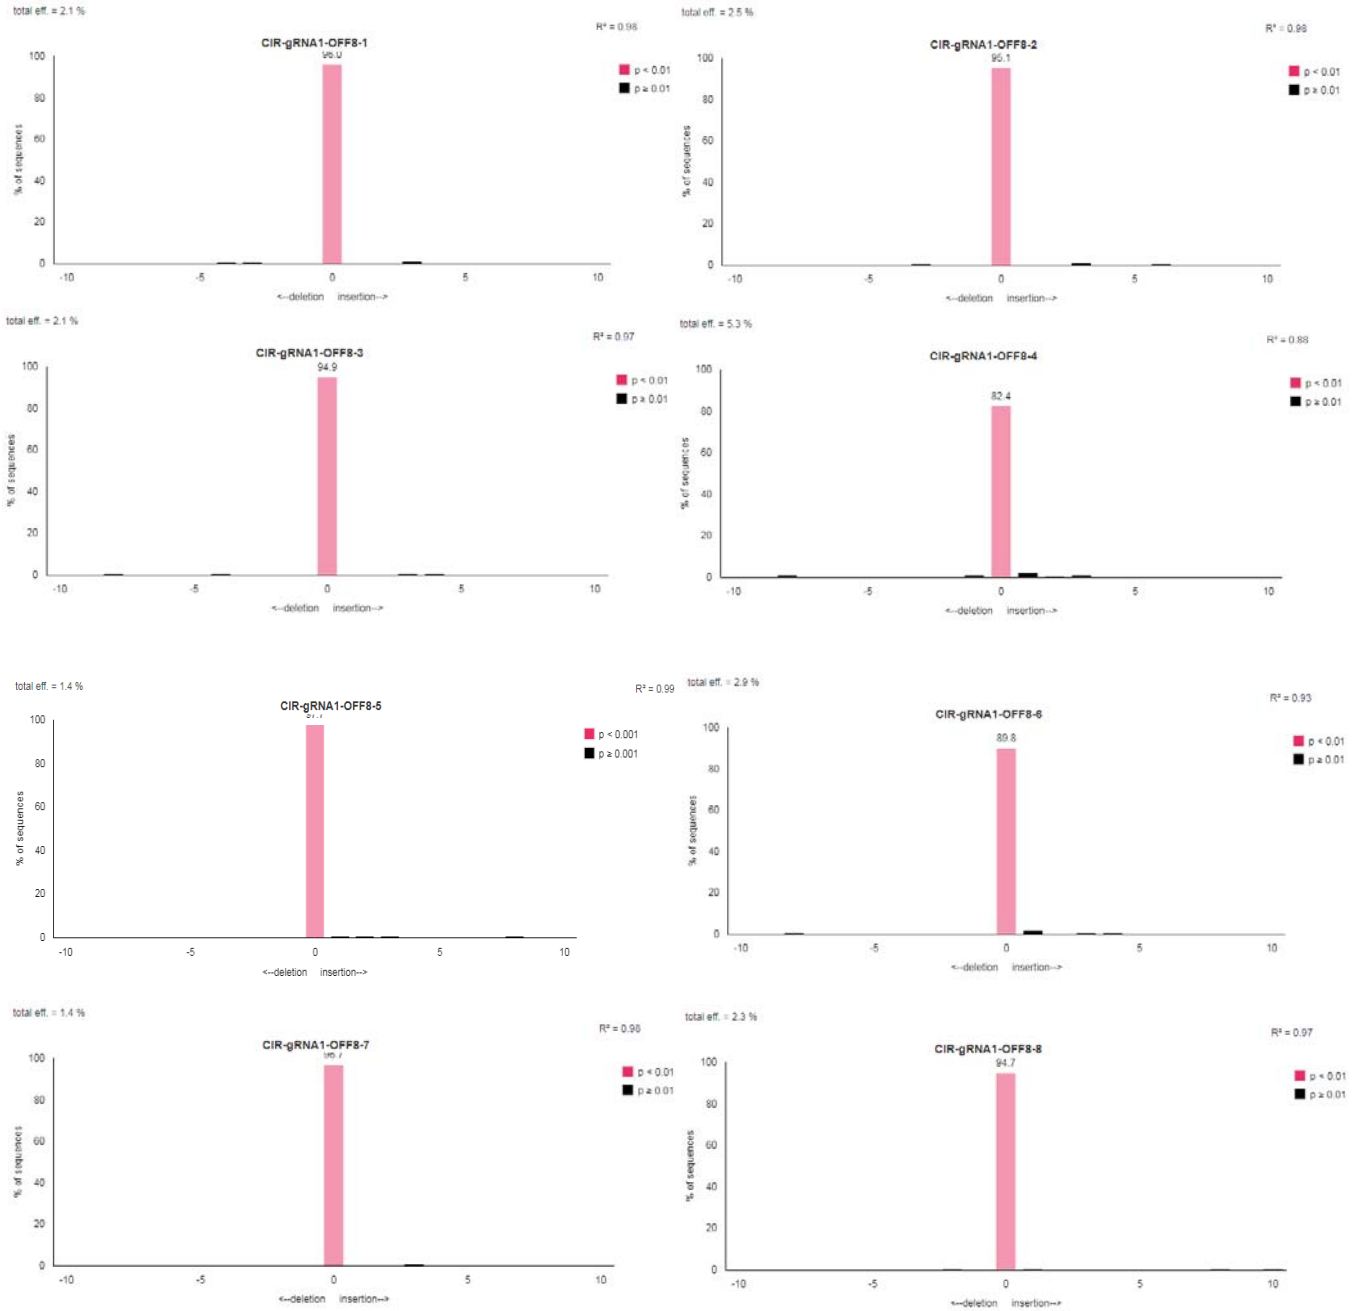

# gRNA1-OFF9

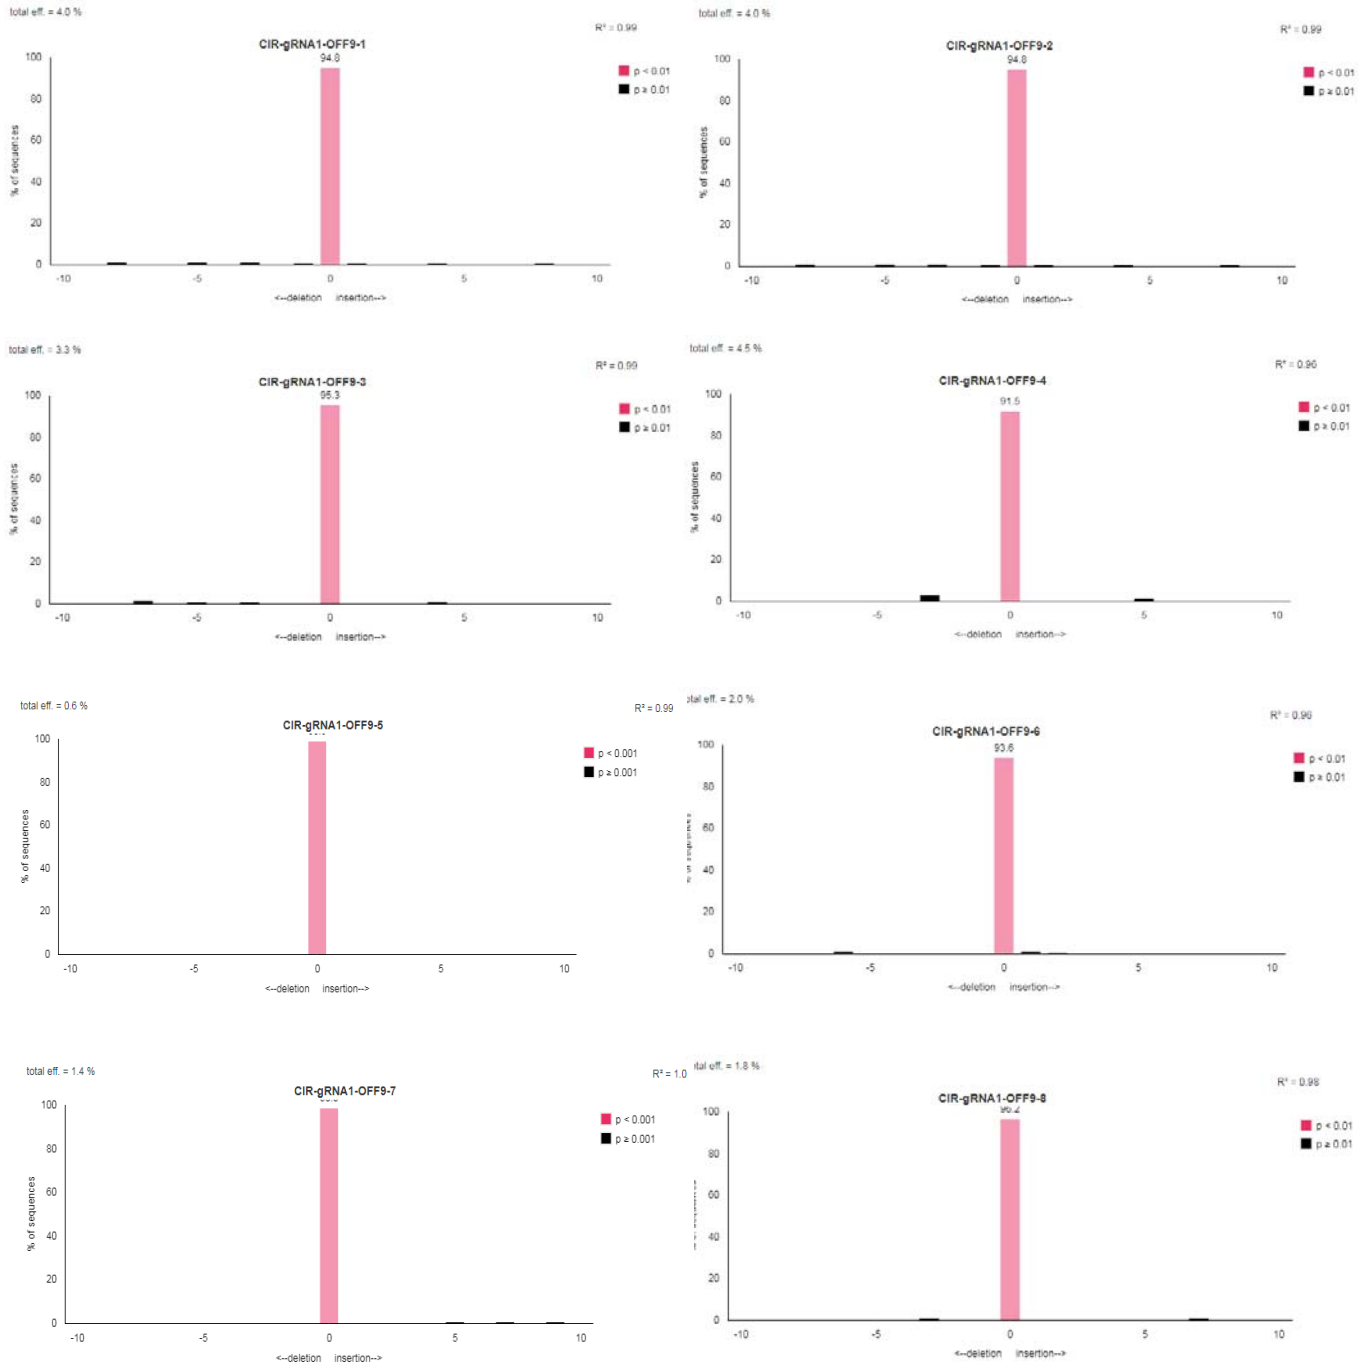

# gRNA1-OFF10

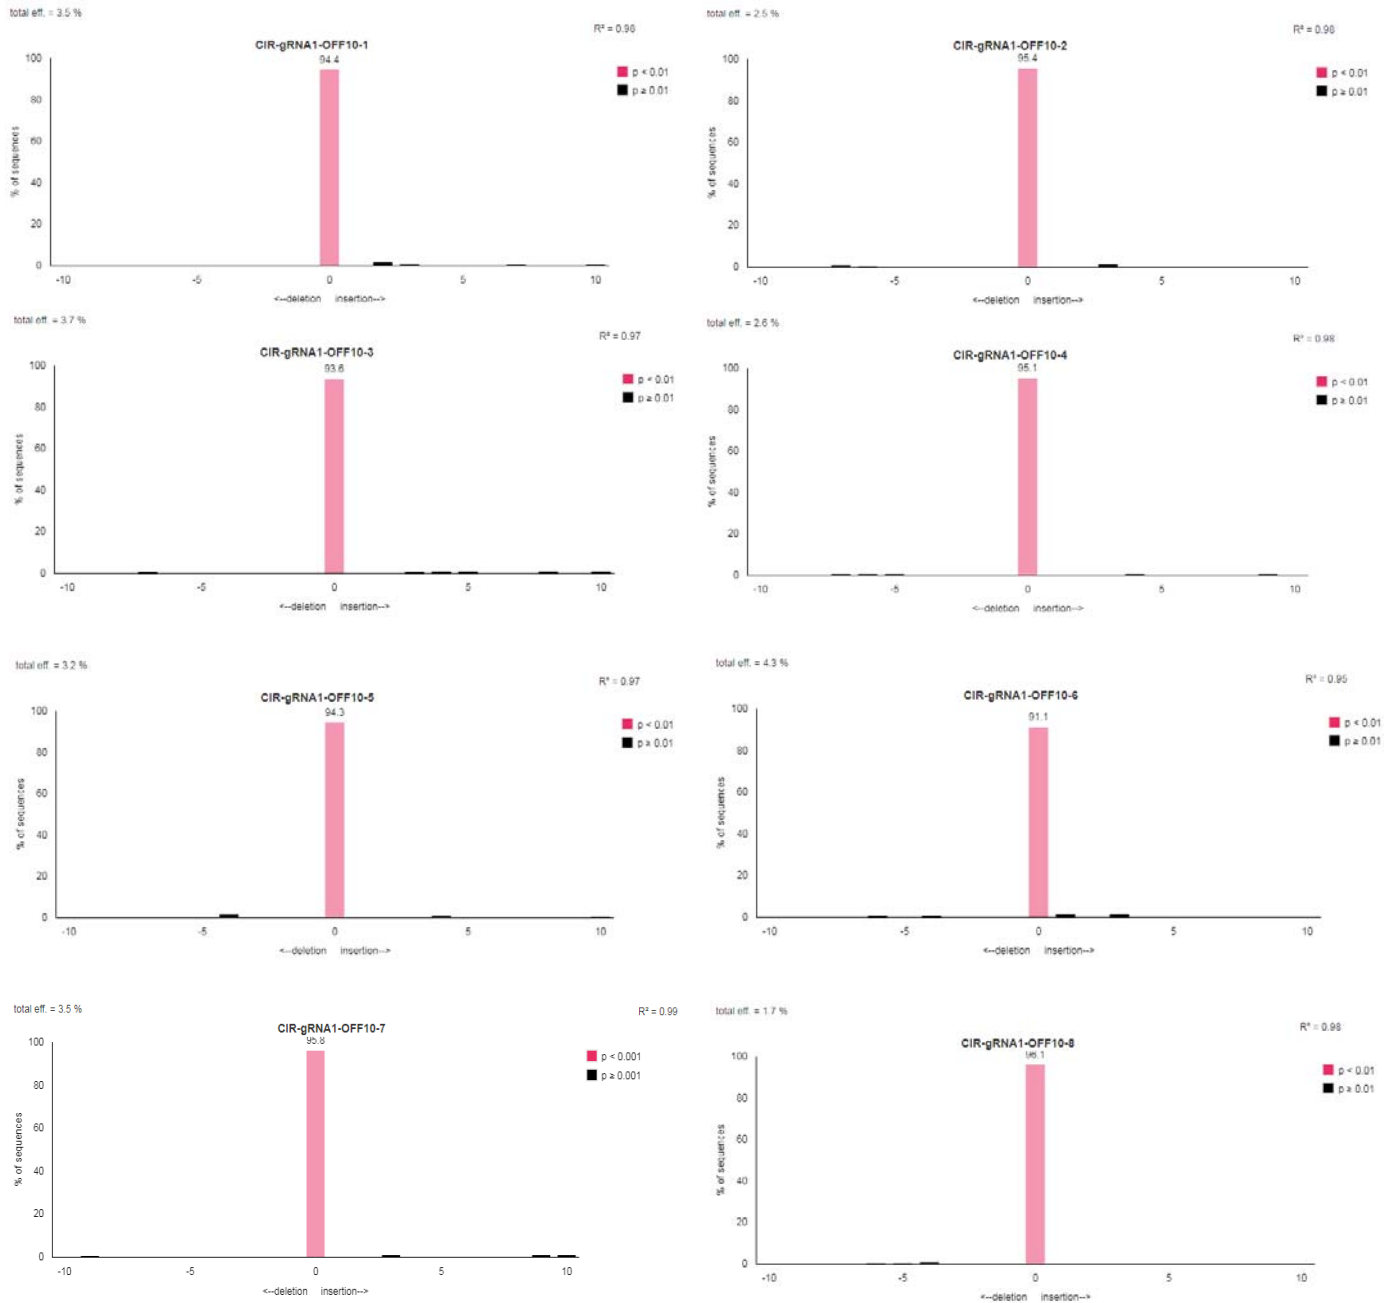

# gRNA1-OFF11

total eff. = 3.1 %

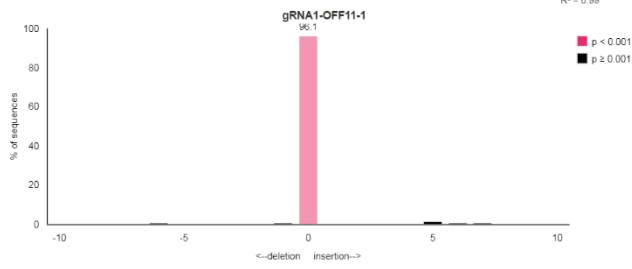

total eff. = 4.9 %

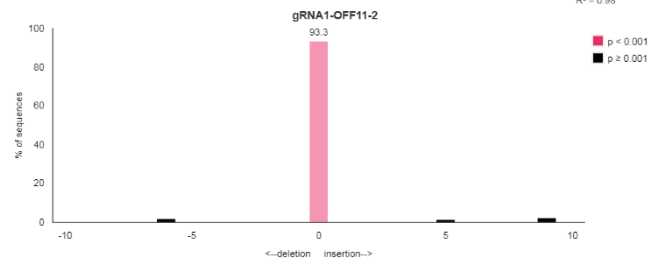

total eff. = 5.2 %

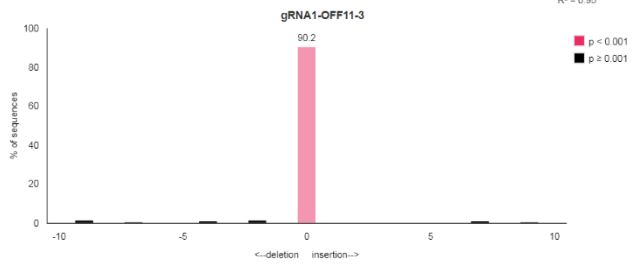

total eff. = 2.9 %

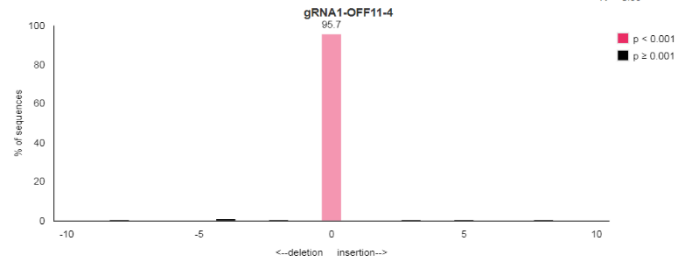

total eff. = 2.4 %

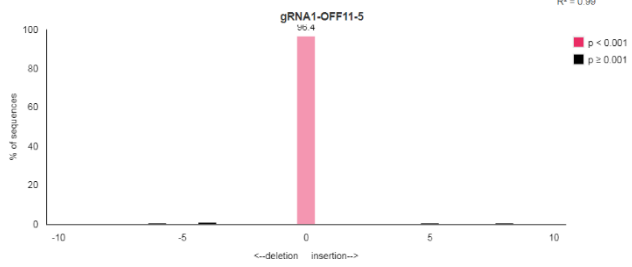

total eff. = 2.4 %

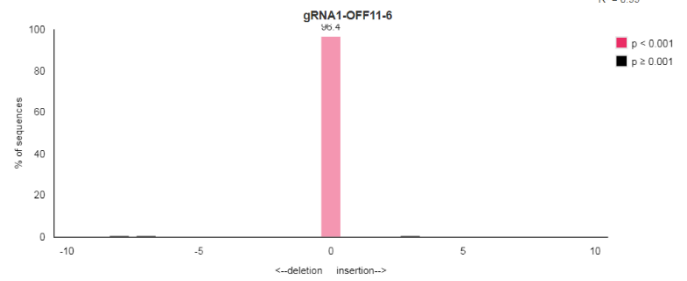

total eff. = 3.4 %

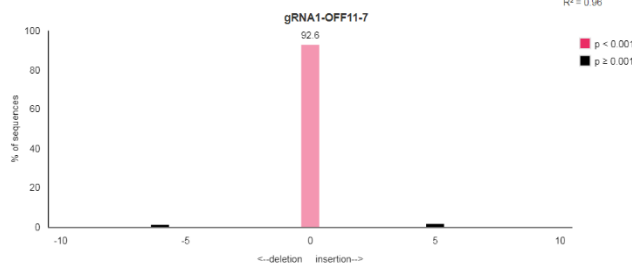

total eff. = 2.7 %

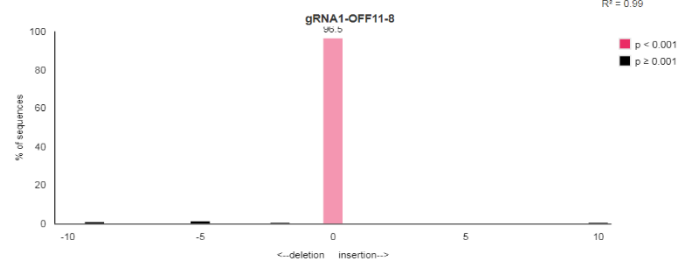

# gRNA1-OFF12

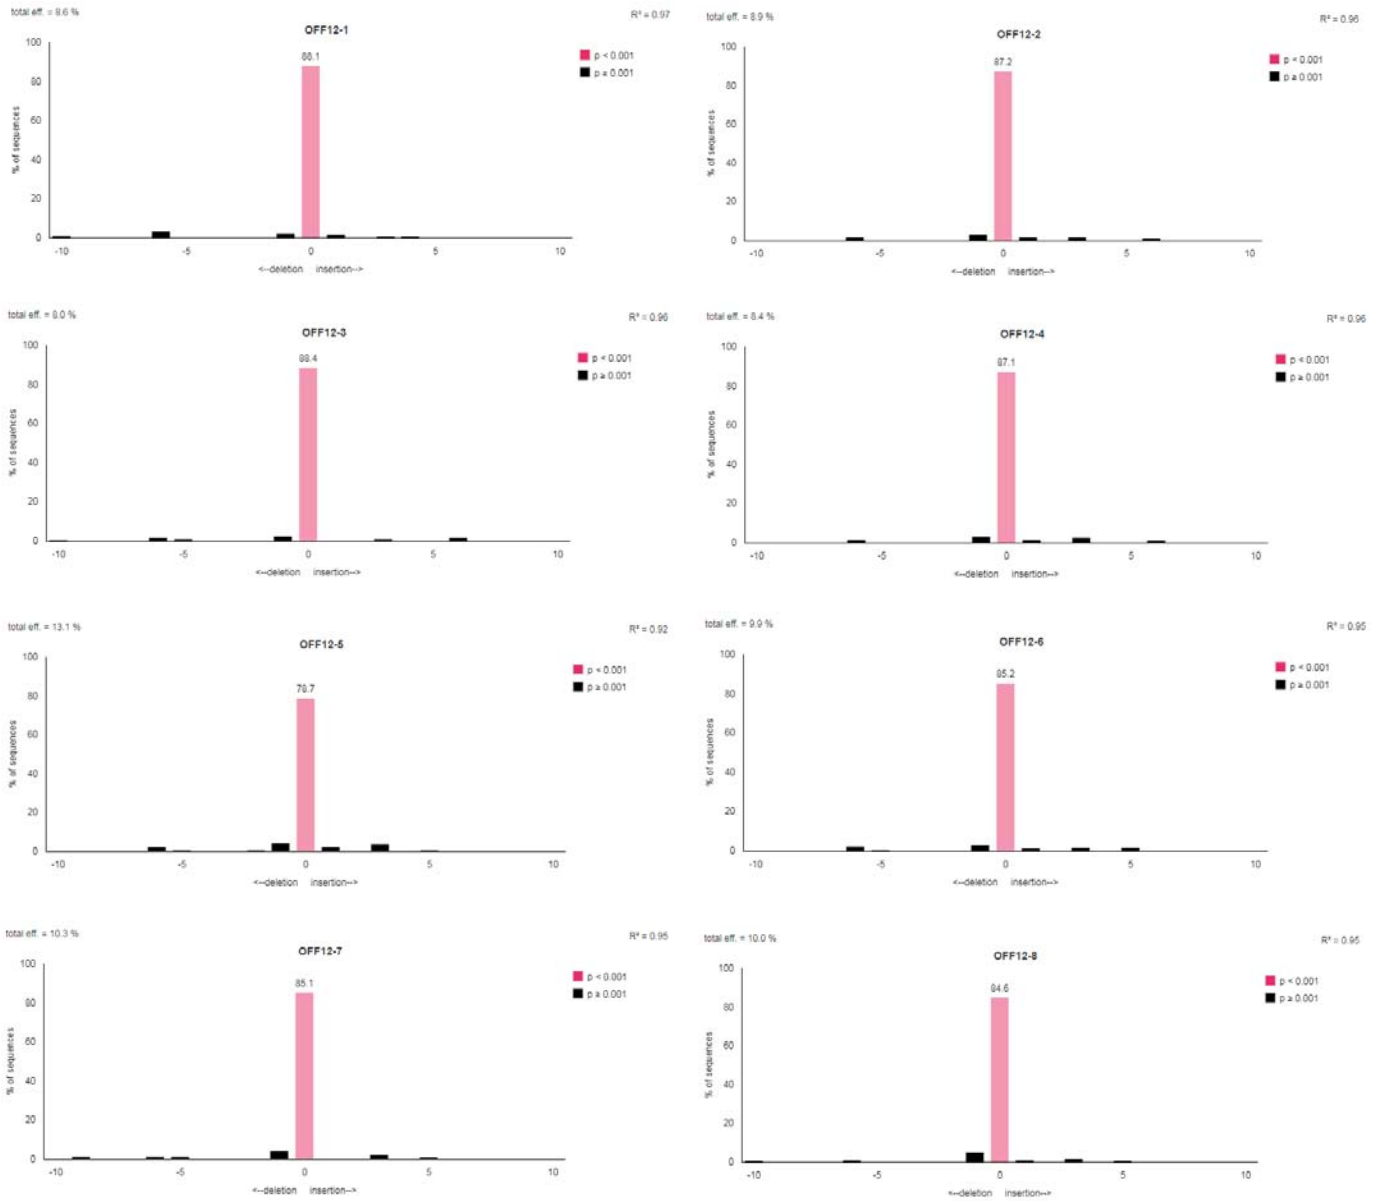

# gRNA1-OFF13

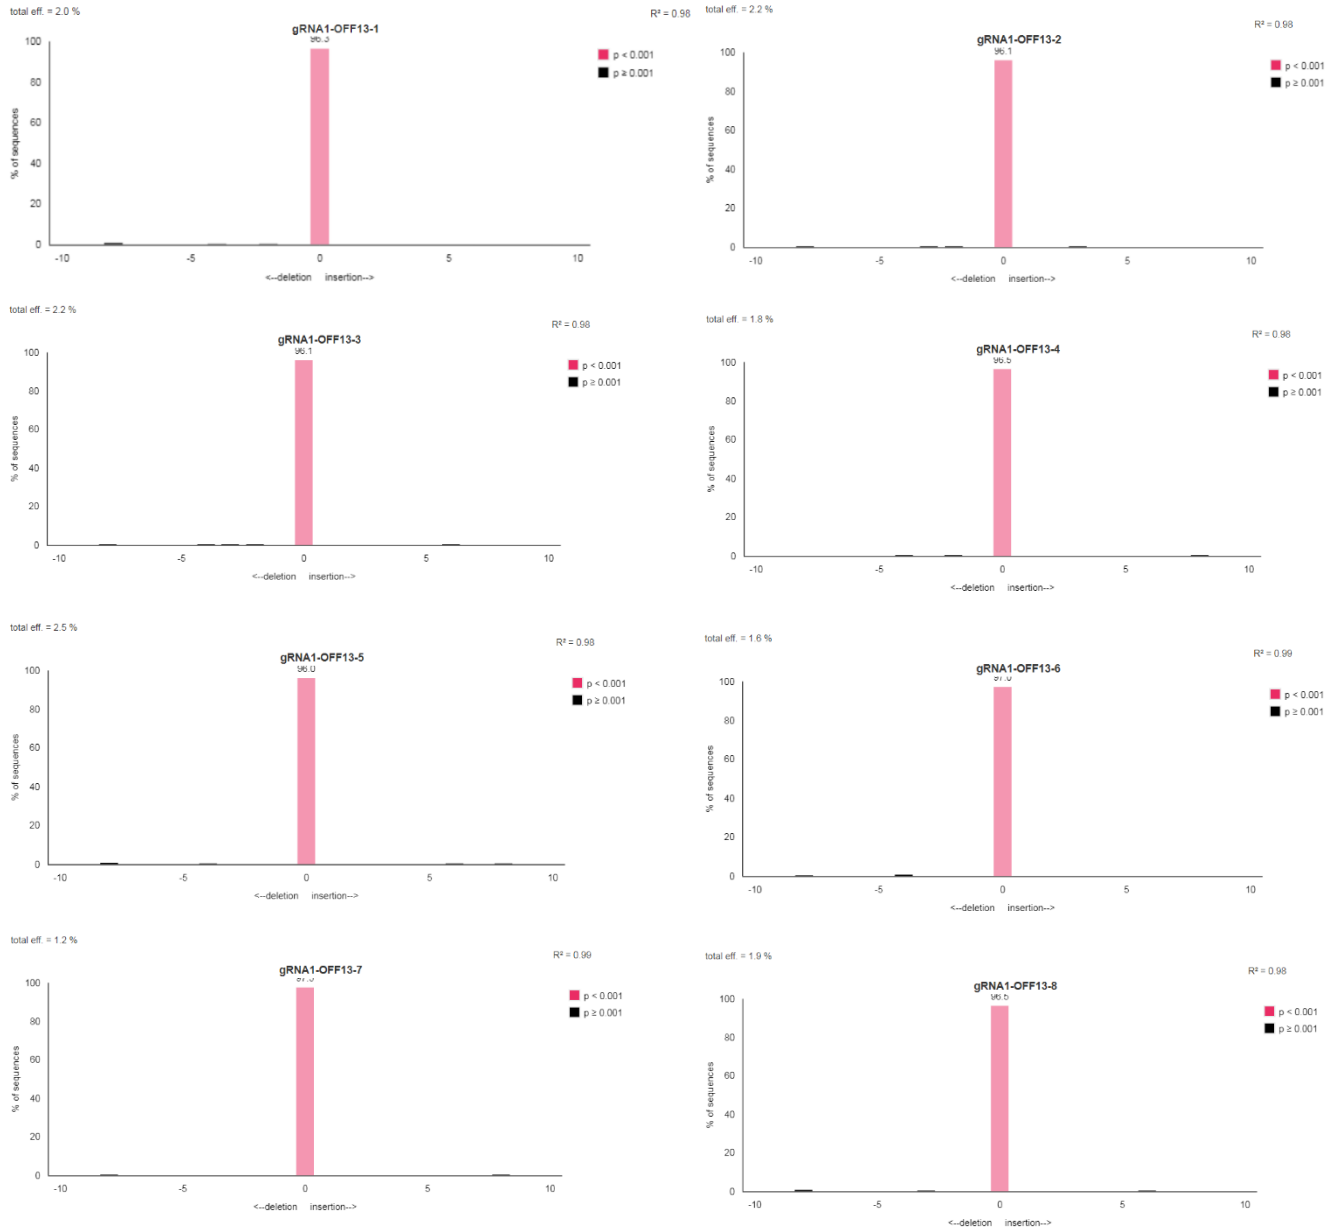

# gRNA1-OFF14

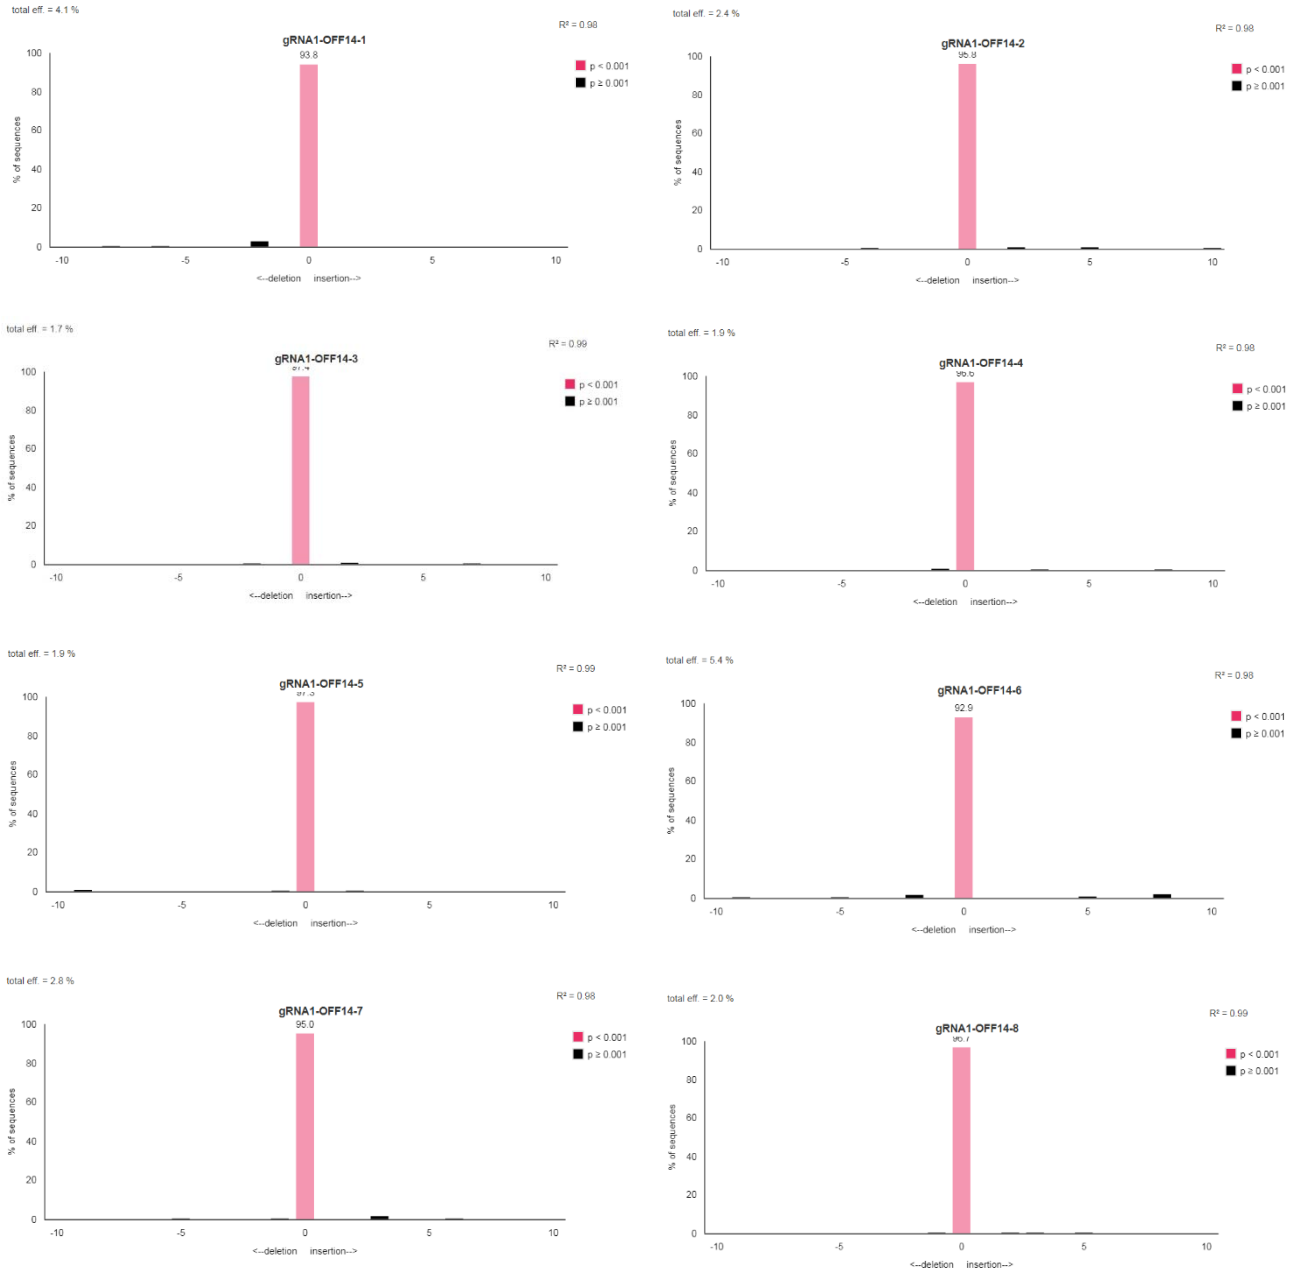

# gRNA1-OFF15

total eff. = 4.0 %

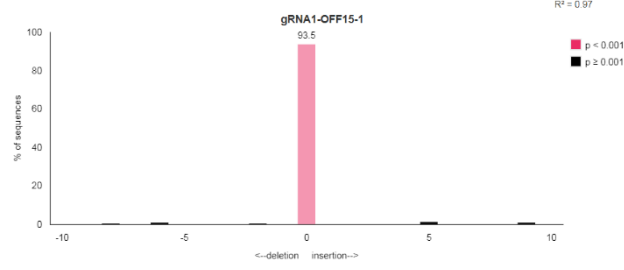

total eff. = 2.5 %

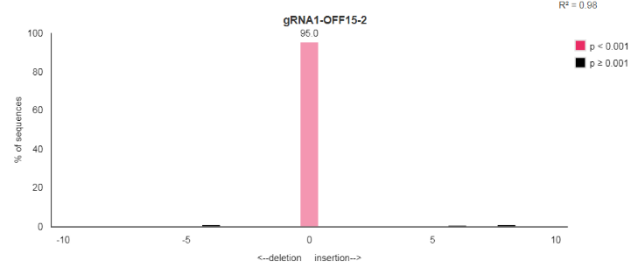

total eff. = 2.0 %

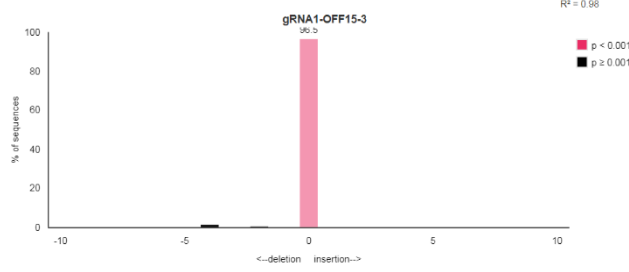

total eff. = 3.0 %

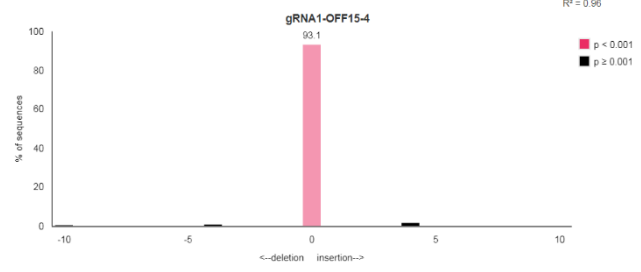

total eff. = 2.5 %

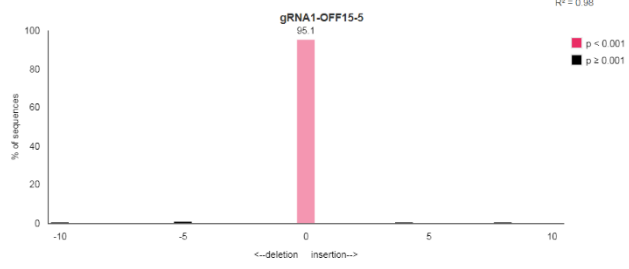

total eff. = 1.8 %

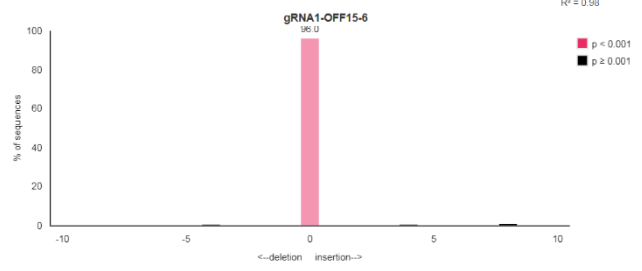

total eff. = 3.1 %

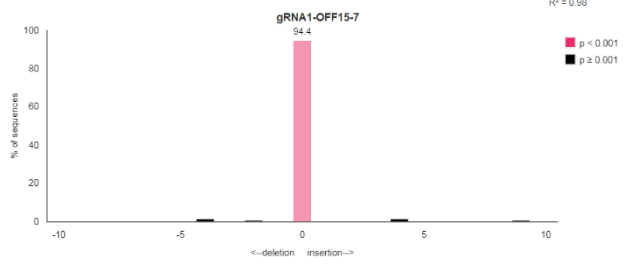

total eff. = 3.6 %

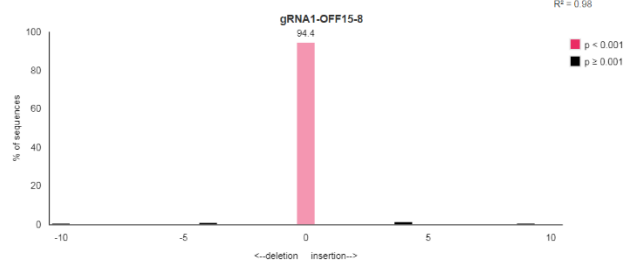



# gRNA1-OFF16

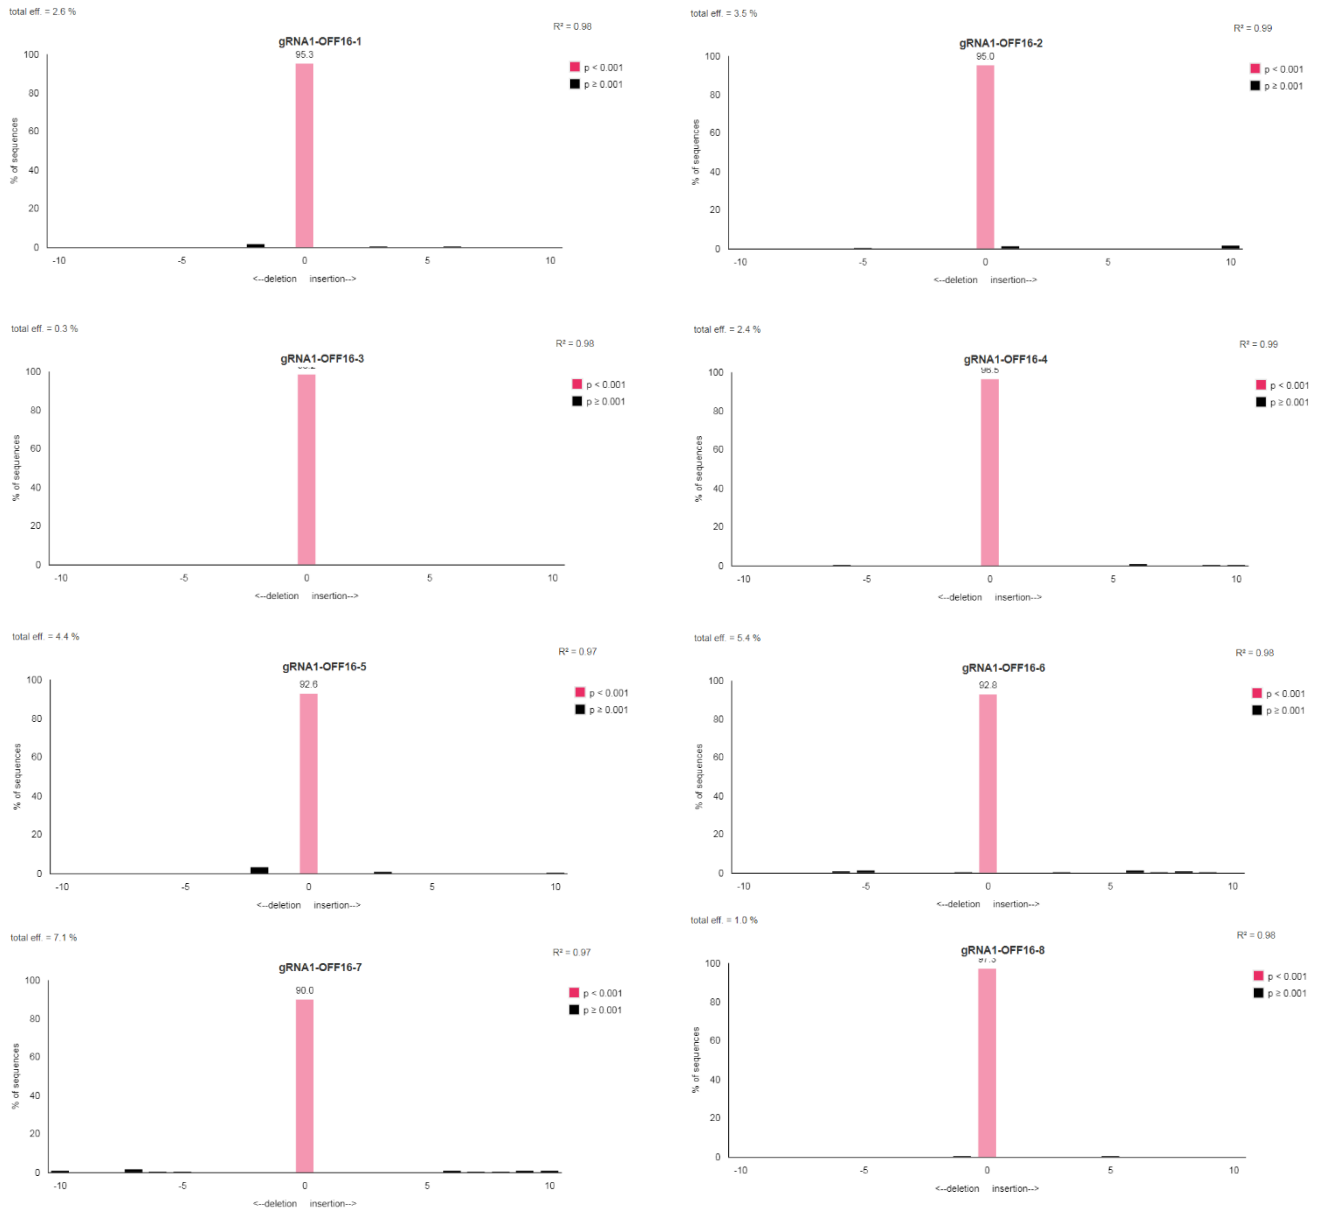

# gRNA1-OFF17

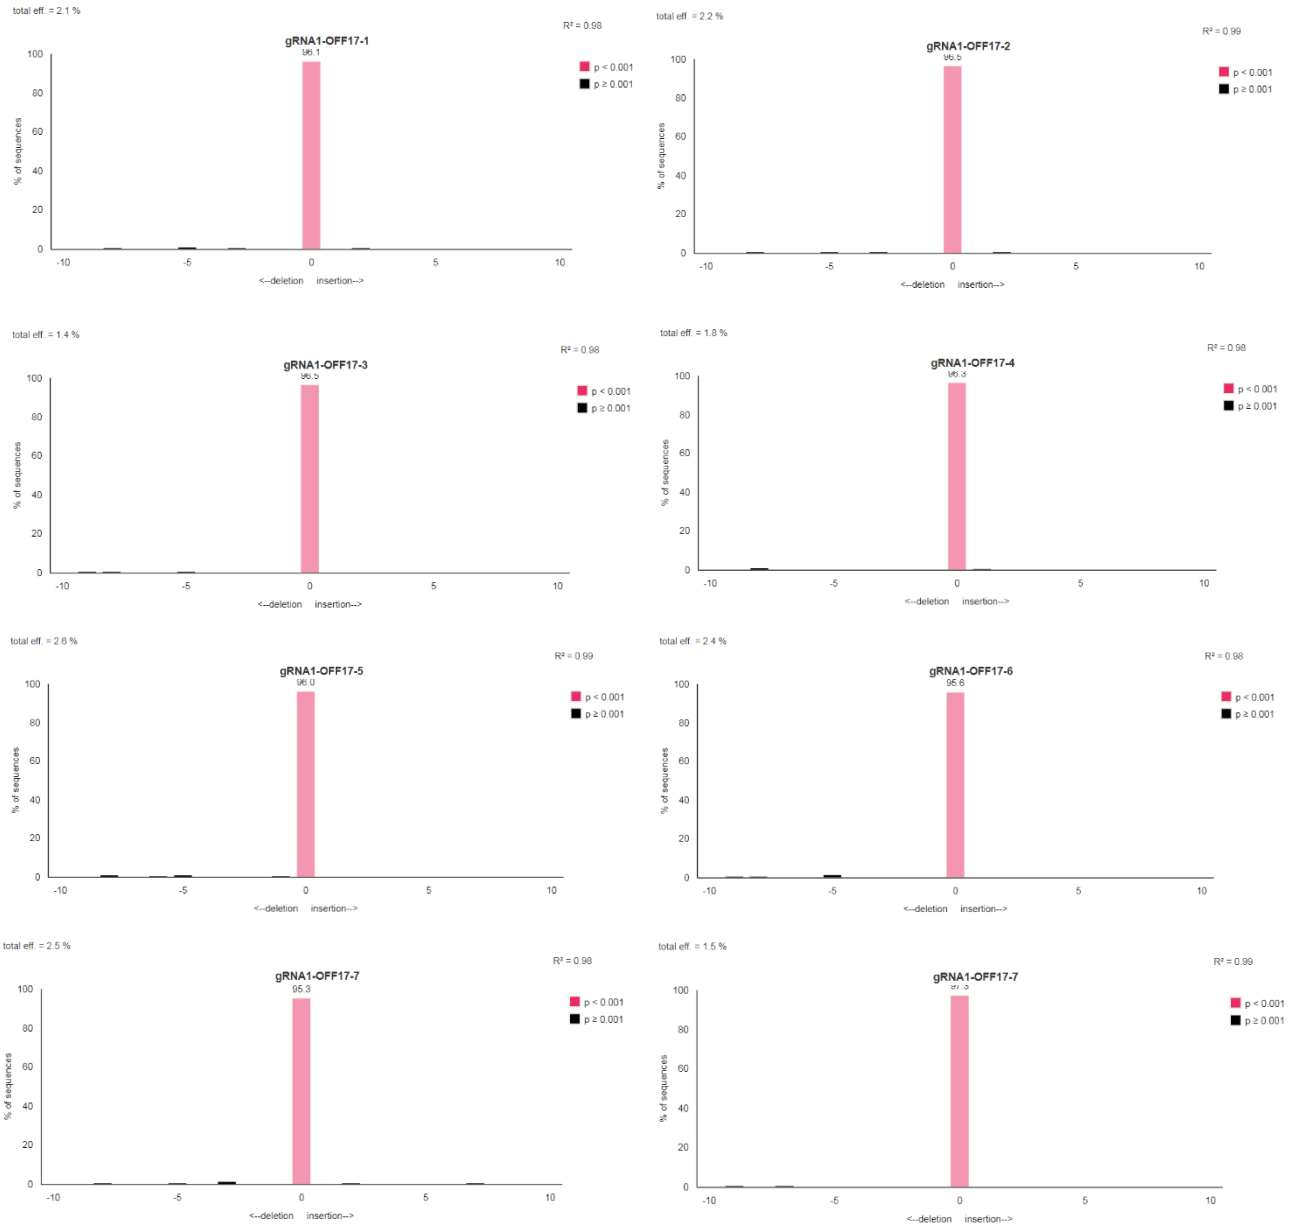

## A845B (gRNA2) T1 sample information

A total of 24 T1 plants derived from 10 different T0 lines were screened for off-target mutagenesis analysis. Seventeen plants were T-DNA positive (+), which constitutively expresses Cas9 nuclease, whereas seven were negative segregants (-) without Cas9 gene. PCR was carried for each gDNA sample, and then four reactions were pooled (Sample pool) for Sanger sequencing. Thus, six sanger sequencing reactions were carried out per off-target. Eighteen CIRCLE-seq found (gRNA2-OFF1-16, 19, 20) and two Cas-OFFinder predicted off-targets (gRNA2-OFF17,18) have been screened, but no evident off-target mutations were detected in the 24 T1 lines. HM, homozygous; BI, biallelic; HT, heterozygous; MO, mosaic; WT, wild type; MT, *gl2* mutant.

| T0 genotype | A845B | T-DNA   | T1 phenotype | Sample pool | Off-targets with mutation |
|-------------|-------|---------|--------------|-------------|---------------------------|
| (-6, -4+1)  | BI    | 2-4-5   | -            | WT          |                           |
| (-6, -4+1)  | BI    | 2-4-12  | -            | WT          | Pool 1<br>None            |
| (-2, -5)    | BI    | 3-3-6   | +            | MT          |                           |
| (-2, -5)    | BI    | 3-3-7   | +            | MT          |                           |
| (-2, -5)    | BI    | 3-3-10  | +            | MT          | Pool 2<br>None            |
| (-2, -5)    | BI    | 3-4-14  | +            | MT          |                           |
| (-2, -4)    | BI    | 4-1-1   | -            | MT          |                           |
| (-2, -4)    | BI    | 4-1-12  | -            | MT          | Pool 3<br>None            |
| (-2, -4)    | BI    | 4-3-12  | +            | MT          |                           |
| (-2, -4)    | BI    | 4-3-13  | +            | MT          |                           |
| (-2, -3)    | BI    | 5-3-2   | +            | WT          | Pool 4<br>None            |
| (-2, -3)    | BI    | 5-3-5   | +            | WT          |                           |
| (-2, -3)    | BI    | 5-3-11  | +            | WT          |                           |
| (-2, -3)    | BI    | 5-3-13  | +            | WT          | Pool 5<br>None            |
| (-6, -6)    | HM    | 6-4-1   | +            | MT          |                           |
| (-6, -6)    | HM    | 6-4-2   | +            | MT          |                           |
| (-6, -6)    | HM    | 6-4-9   | +            | MT          | Pool 6<br>None            |
| (-6, -6)    | HM    | 6-4-13  | -            | WT          |                           |
| (-1, -6)    | BI    | 7-3-7   | +            | MT          |                           |
| (-1, -6)    | BI    | 7-3-10  | +            | MT          | None                      |
| (-1, -6)    | BI    | 7-3-15  | +            | MT          |                           |
| (0, 0)      | WT    | 8-3-5   | -            | WT          |                           |
| (0, -6)     | HT    | 10-2-2  | +            | WT          | None                      |
| (0, -6)     | HT    | 10-2-10 | -            | WT          |                           |

# gRNA2-OFF1

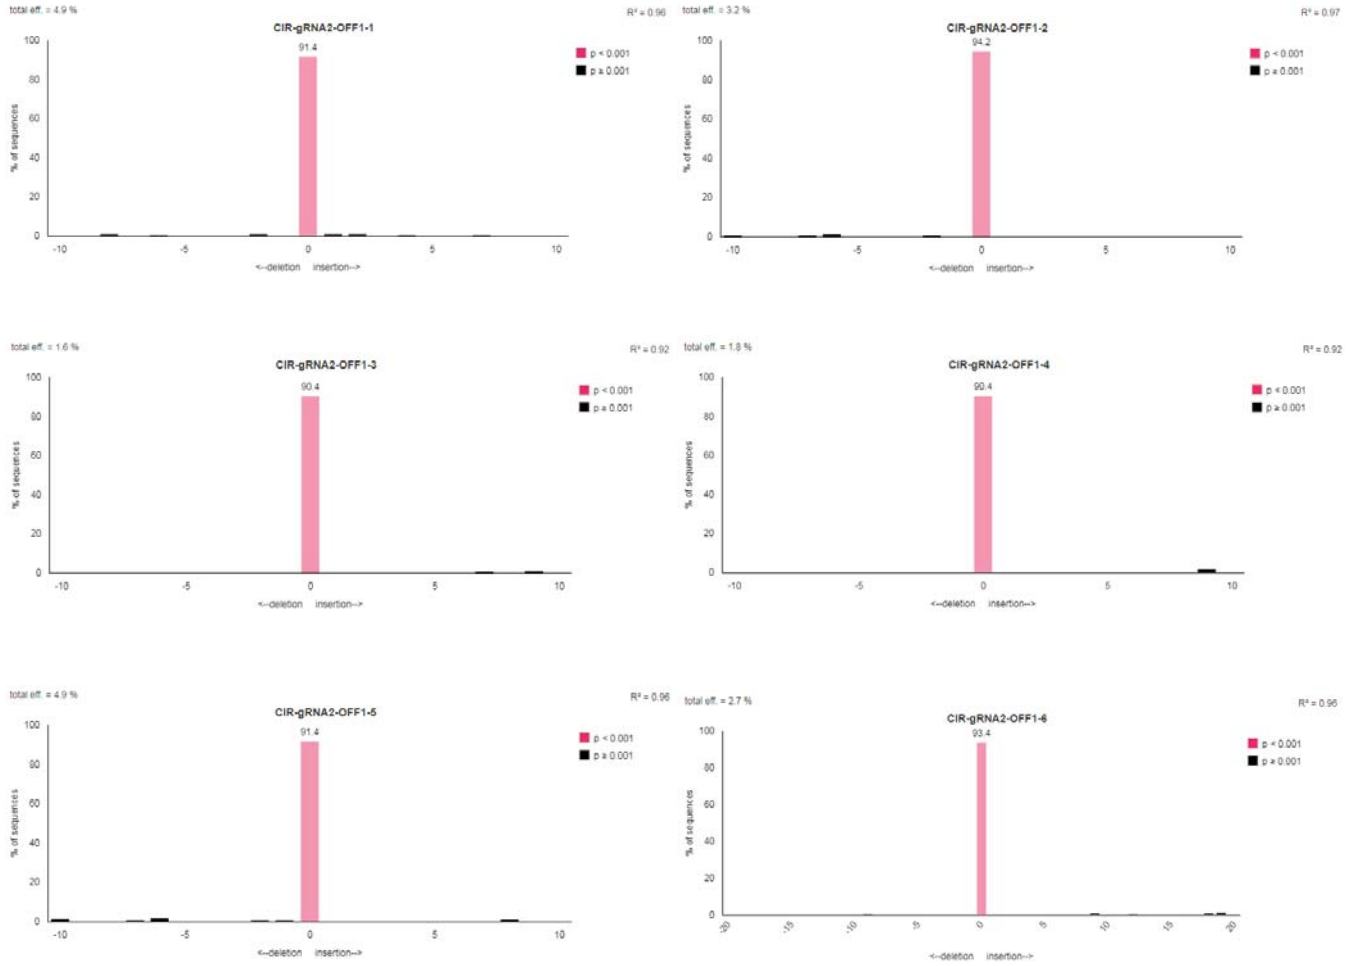

# gRNA2-OFF2

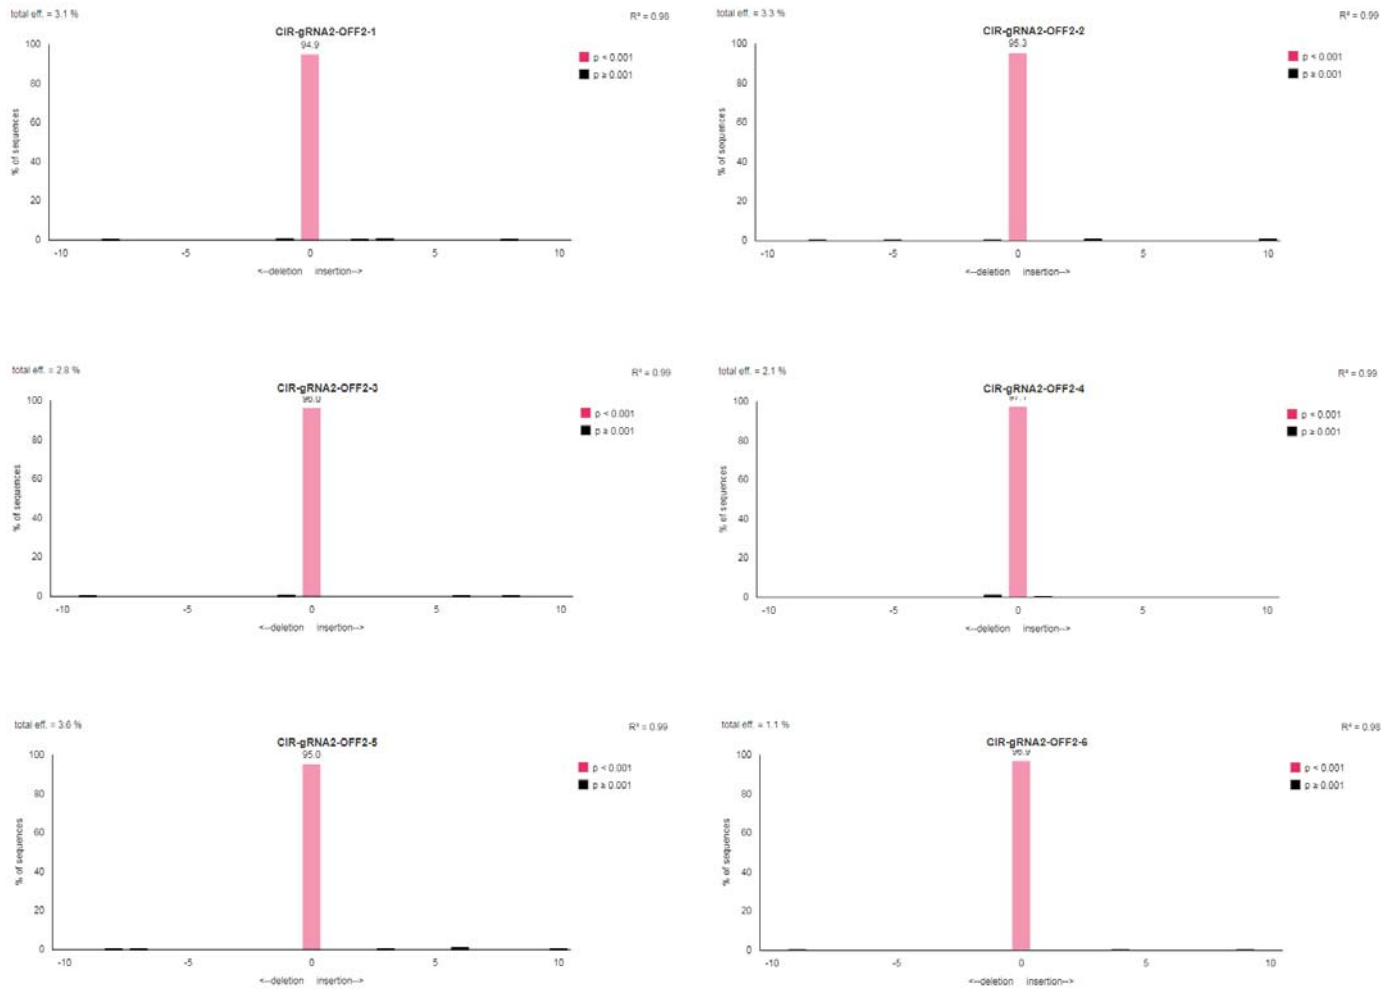

# gRNA2-OFF3

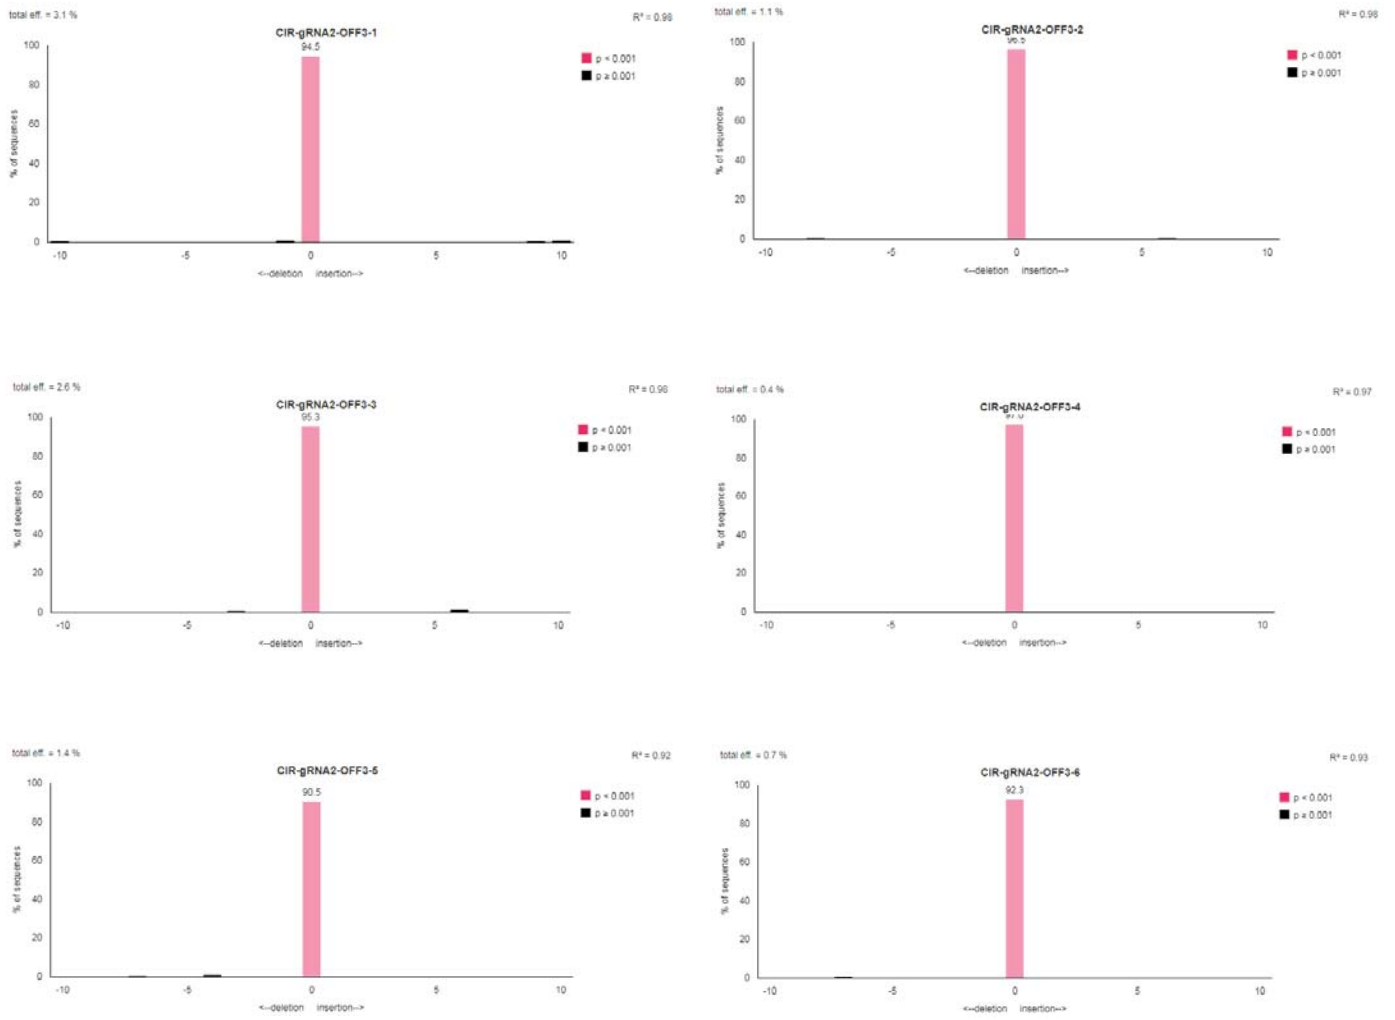

# gRNA2-OFF4

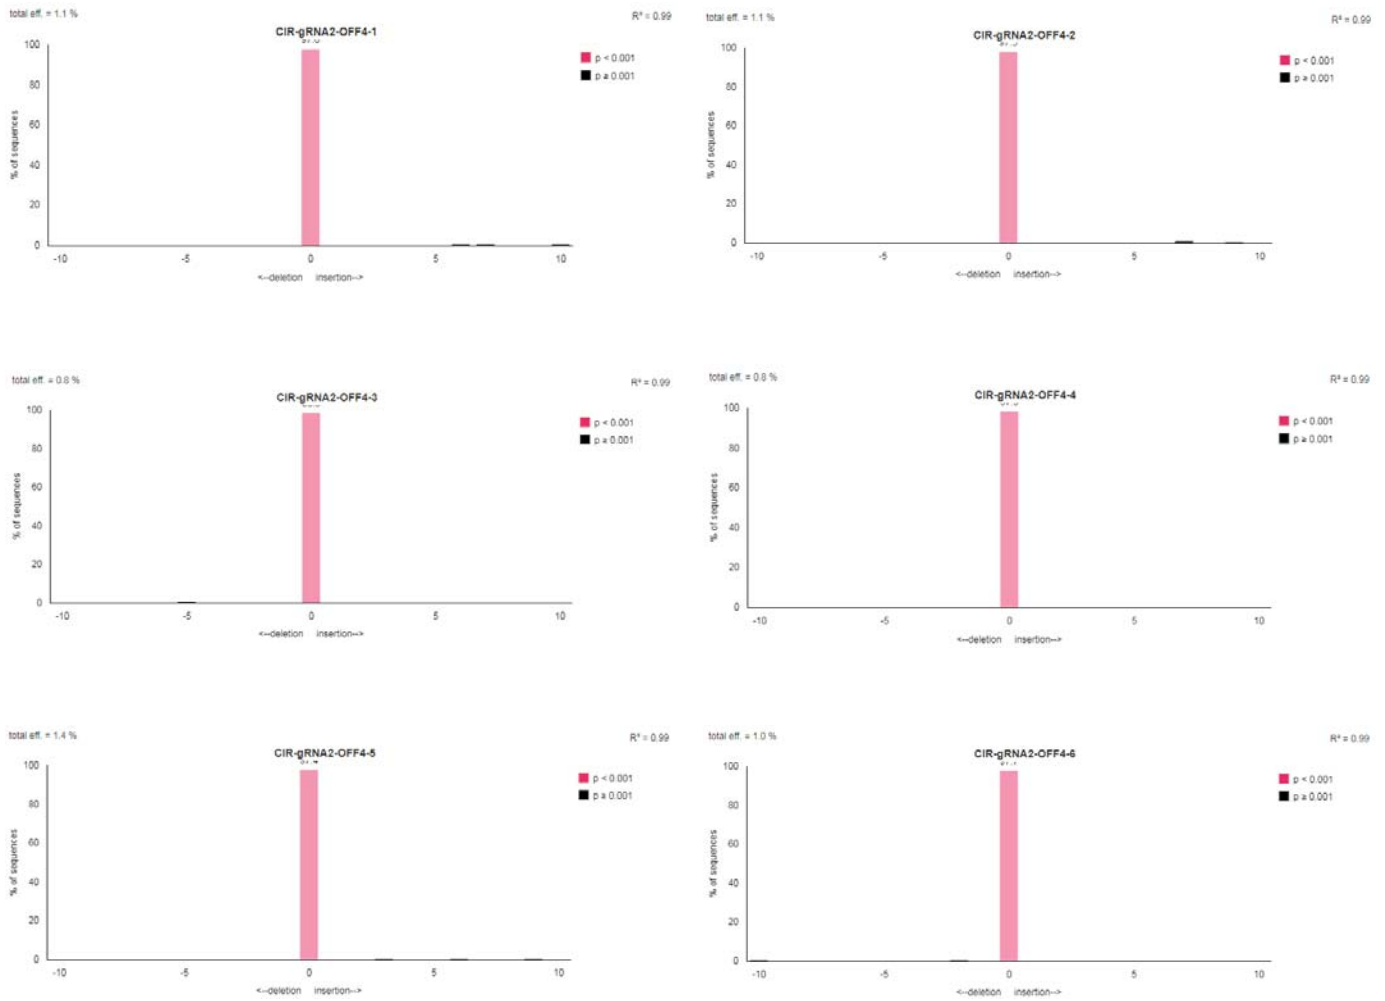

# gRNA2-OFF5

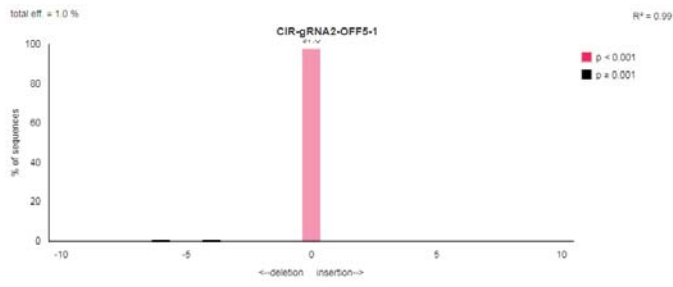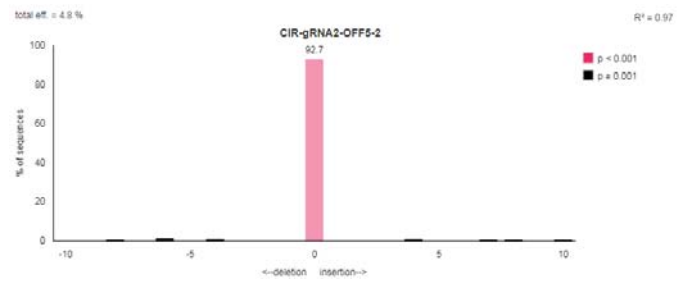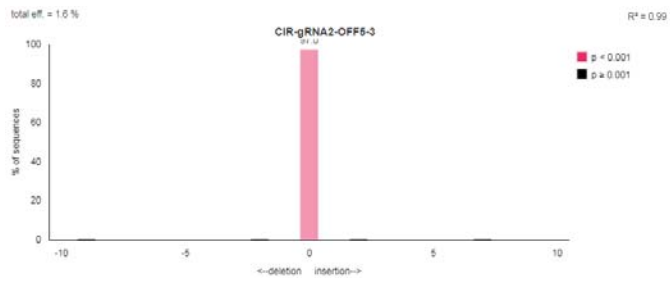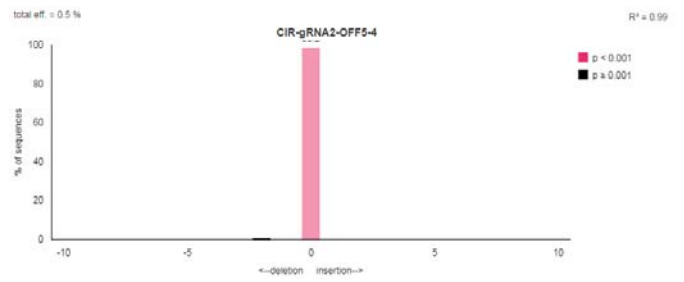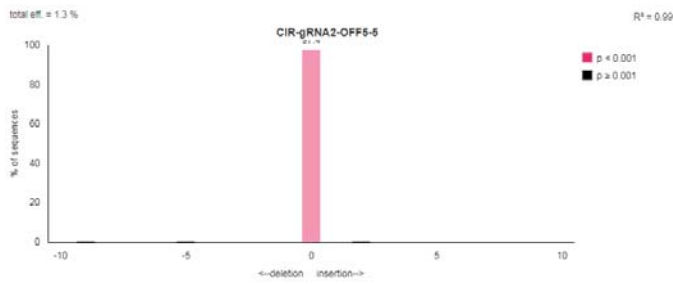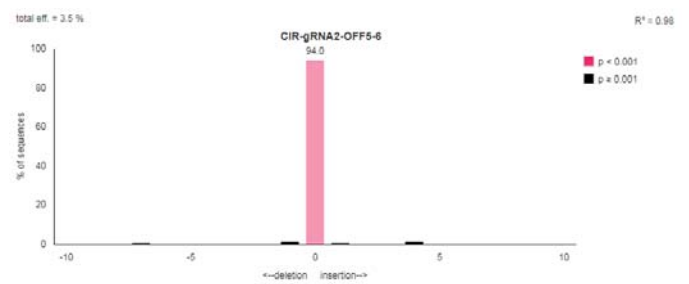



# gRNA2-OFF6

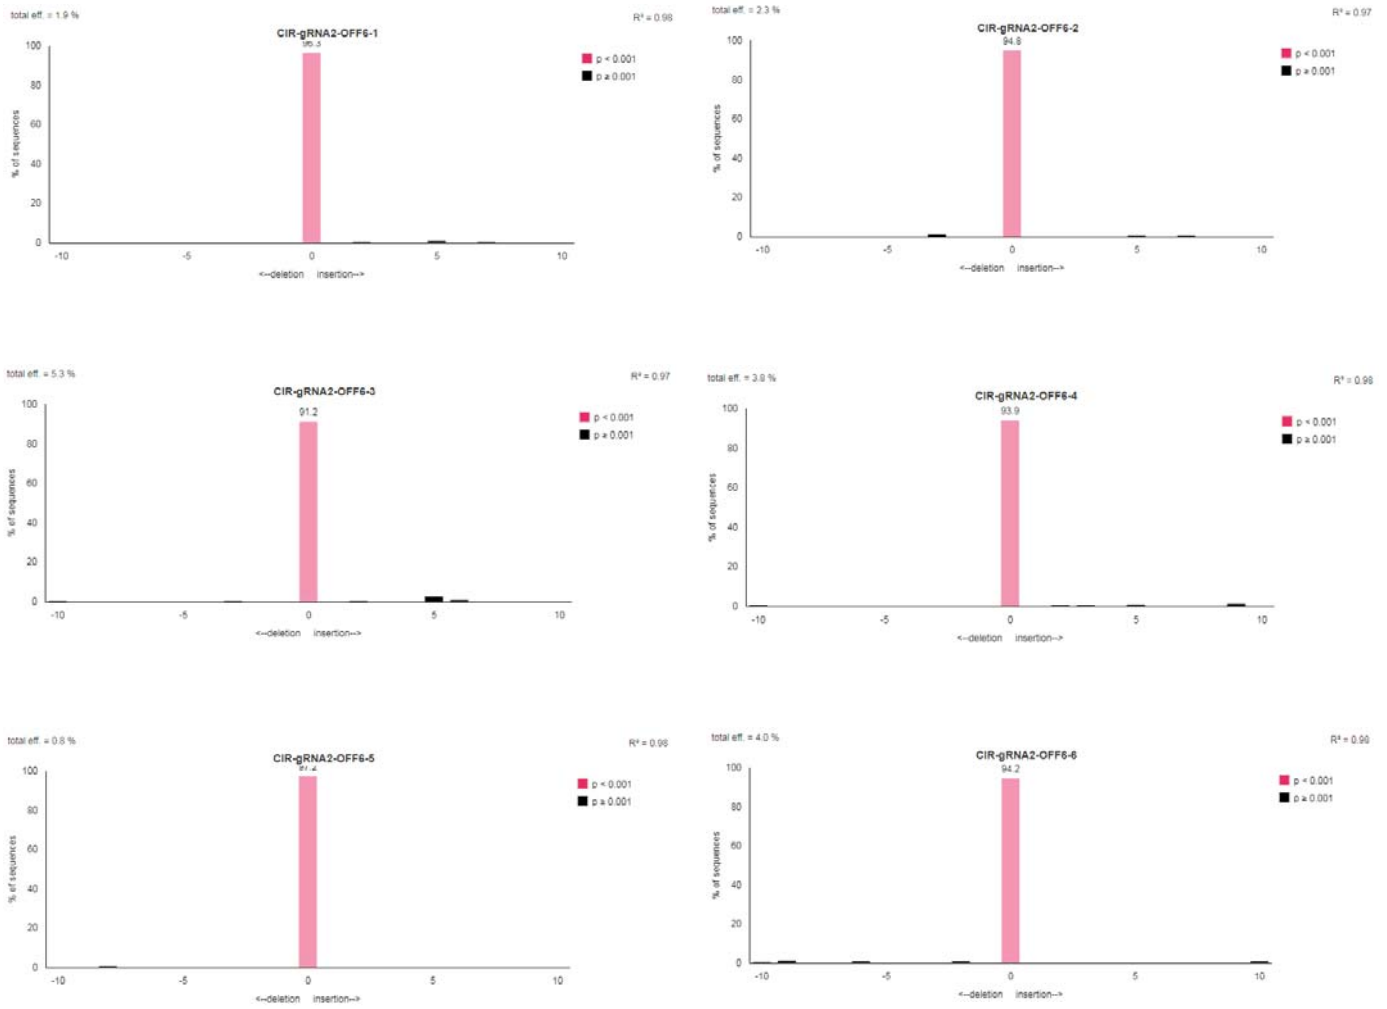

# gRNA2-OFF7

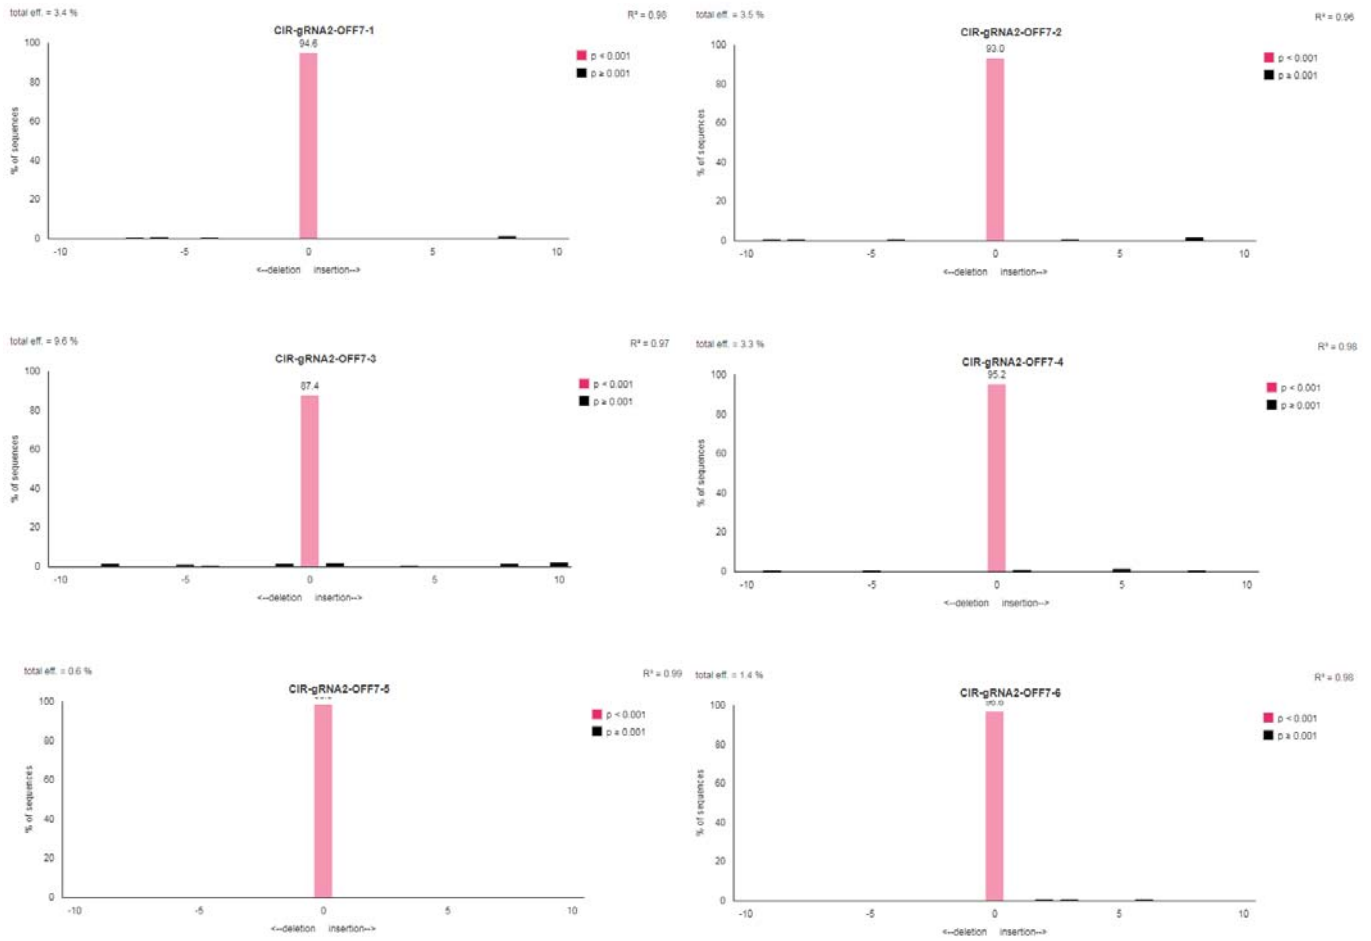

# gRNA2-OFF8

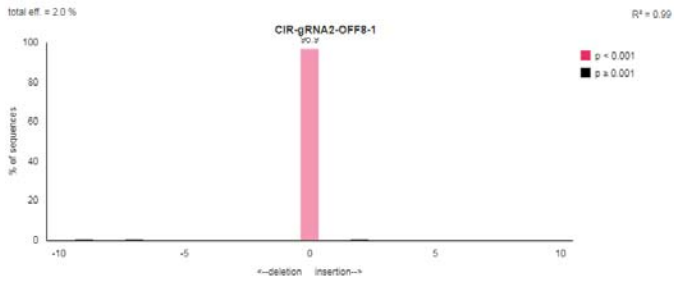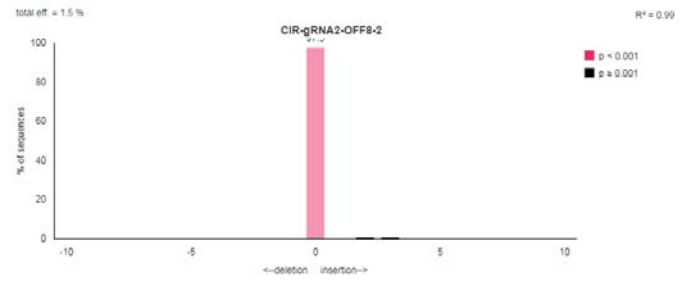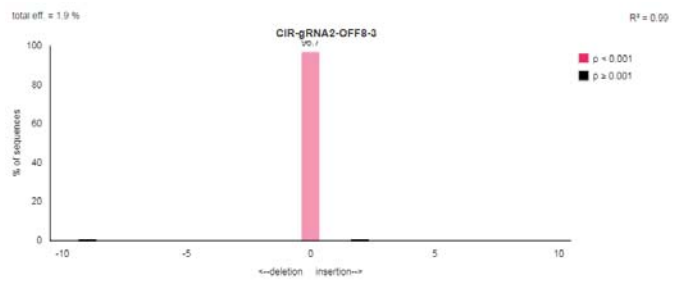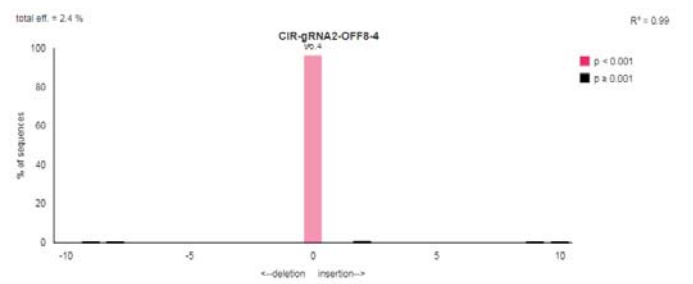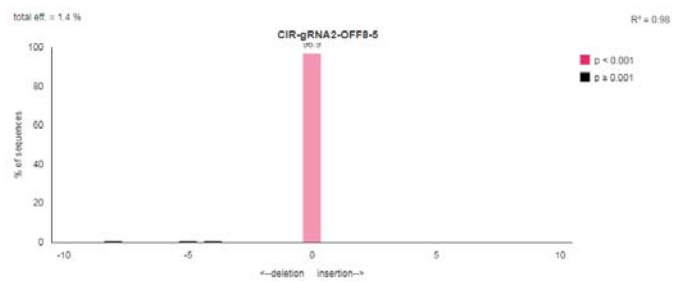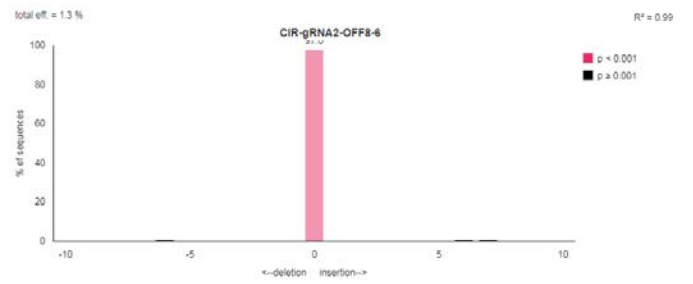

# gRNA2-OFF9

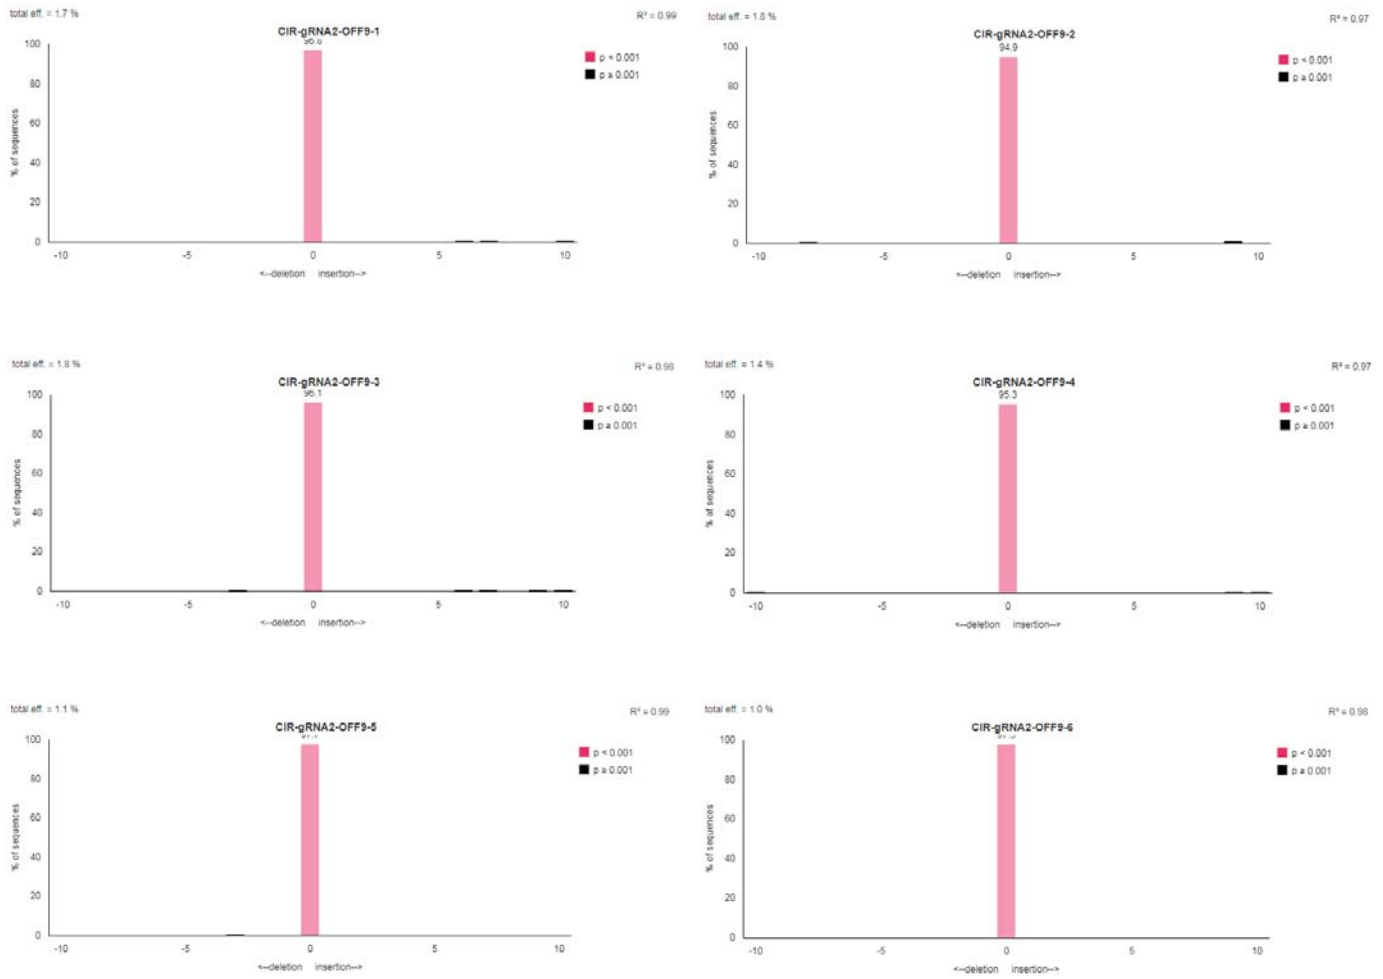

# gRNA2-OFF10

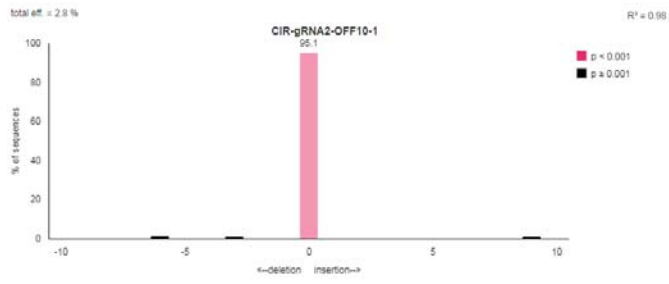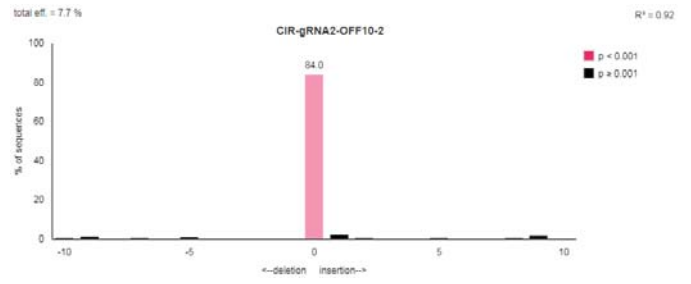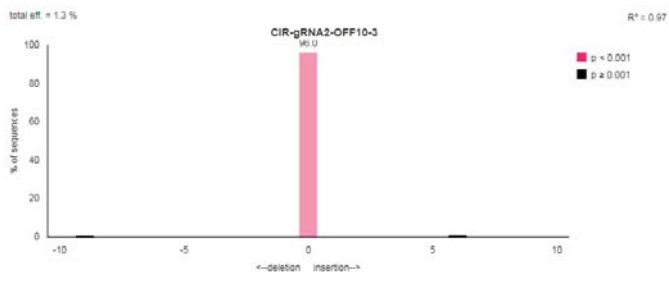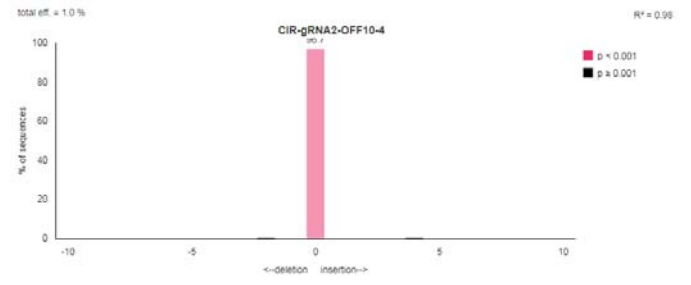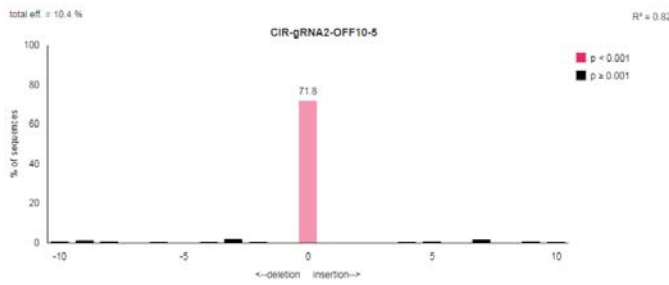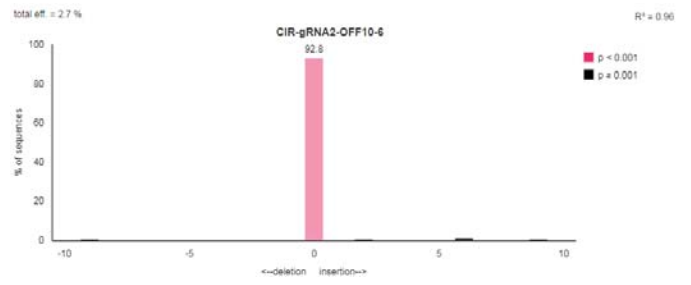

# gRNA2-OFF11

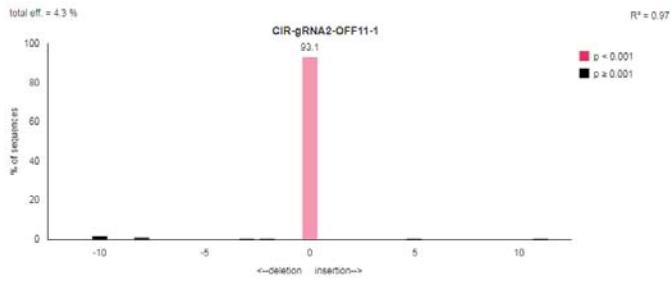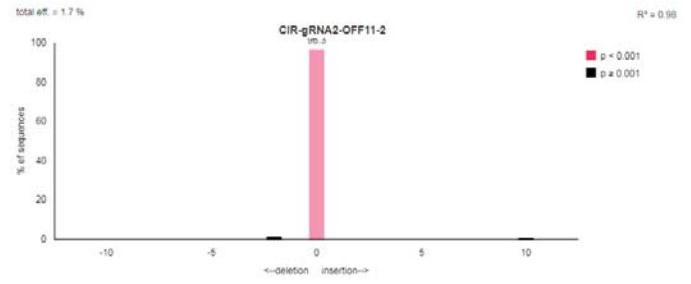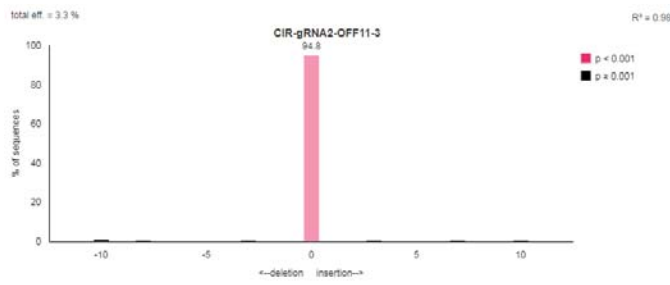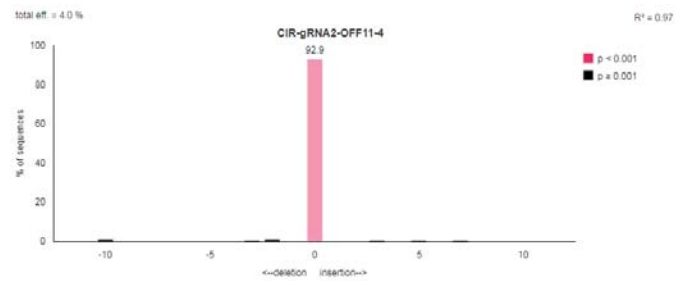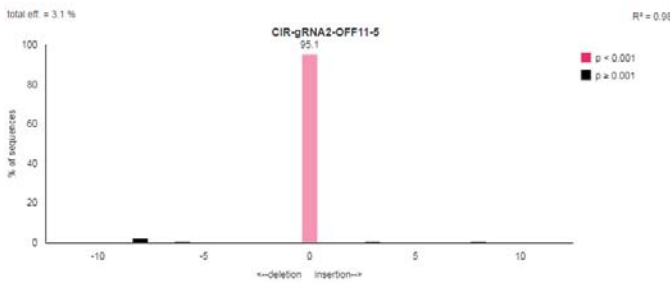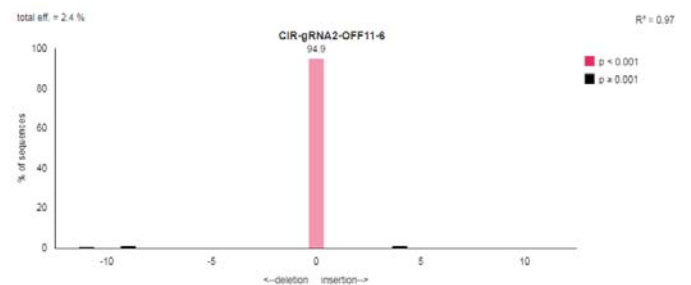

# gRNA2-OFF12

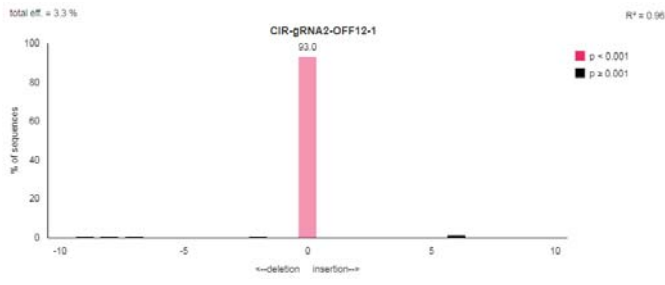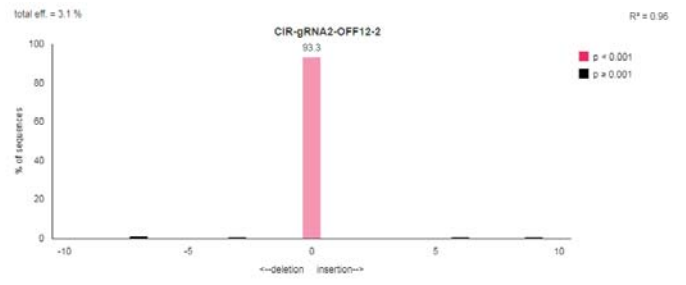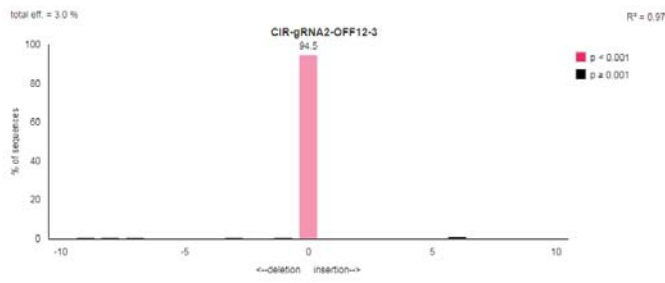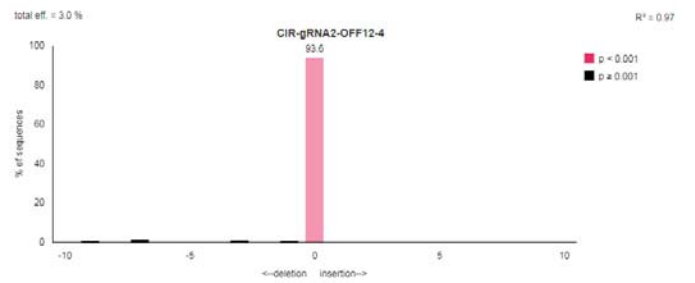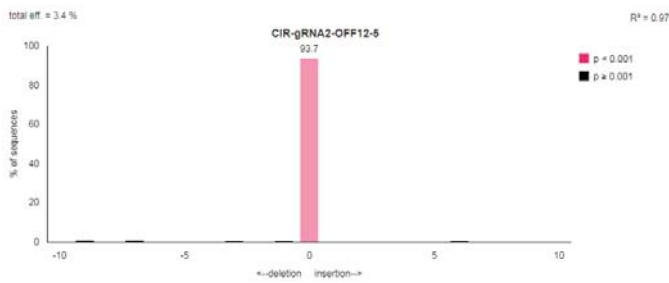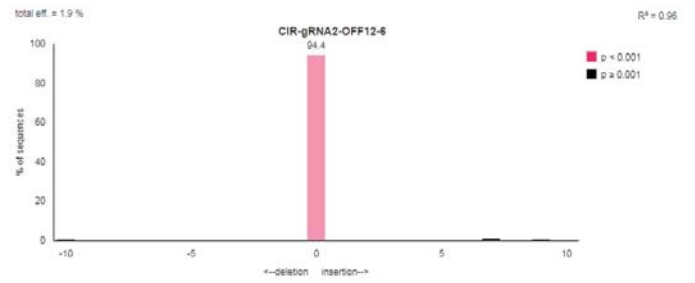

# gRNA2-OFF13

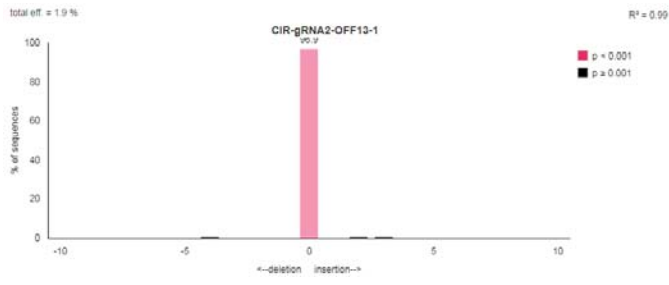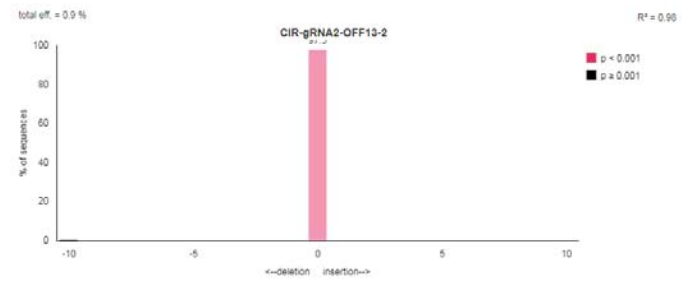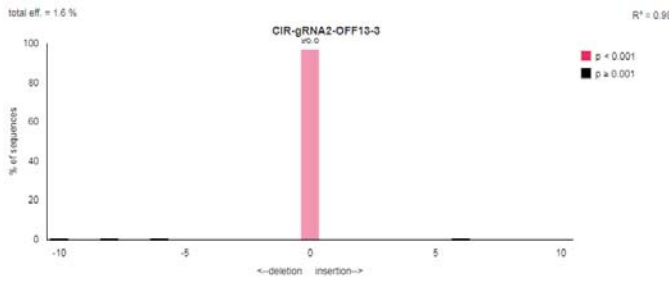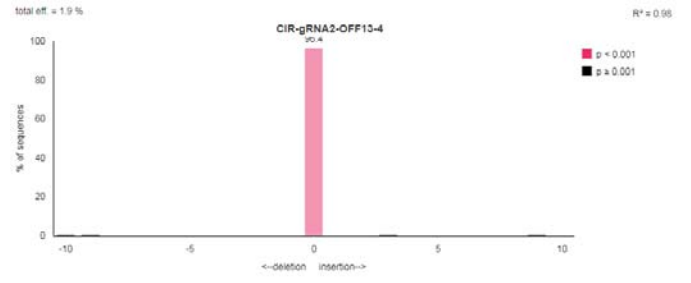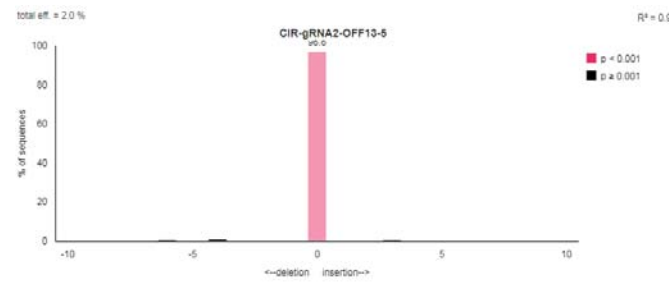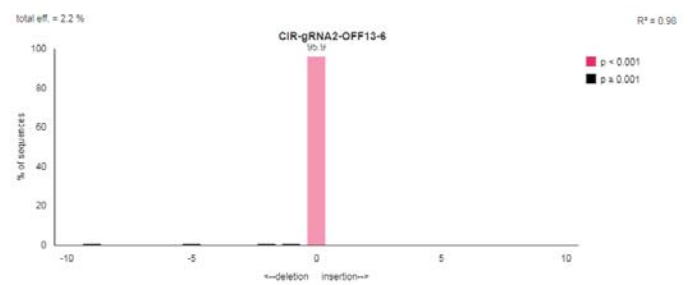



# gRNA2-OFF14

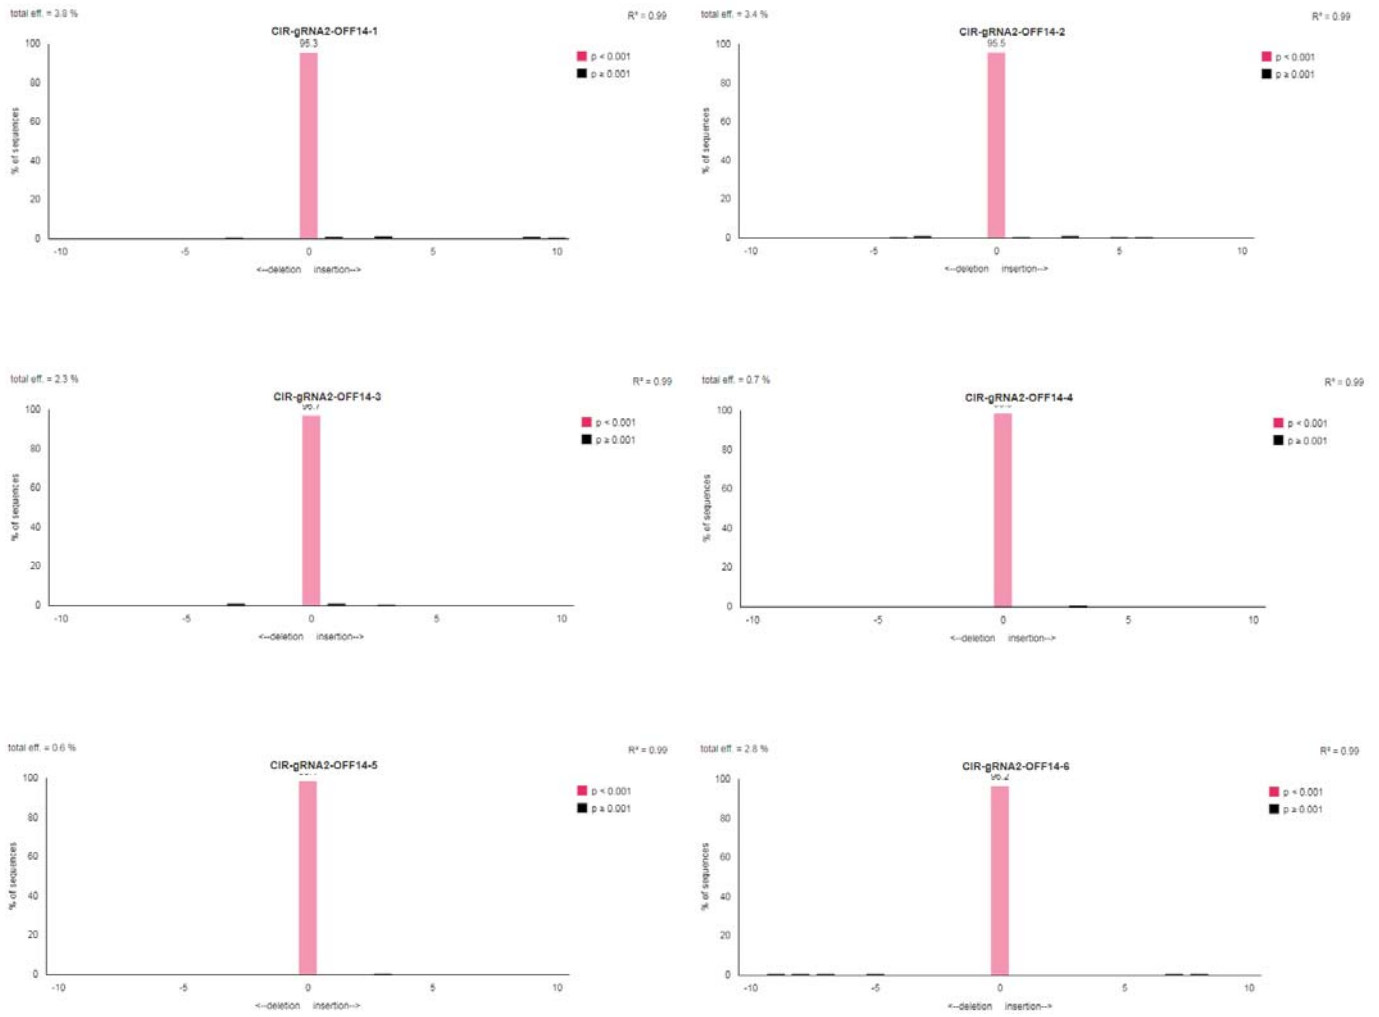

# gRNA2-OFF15

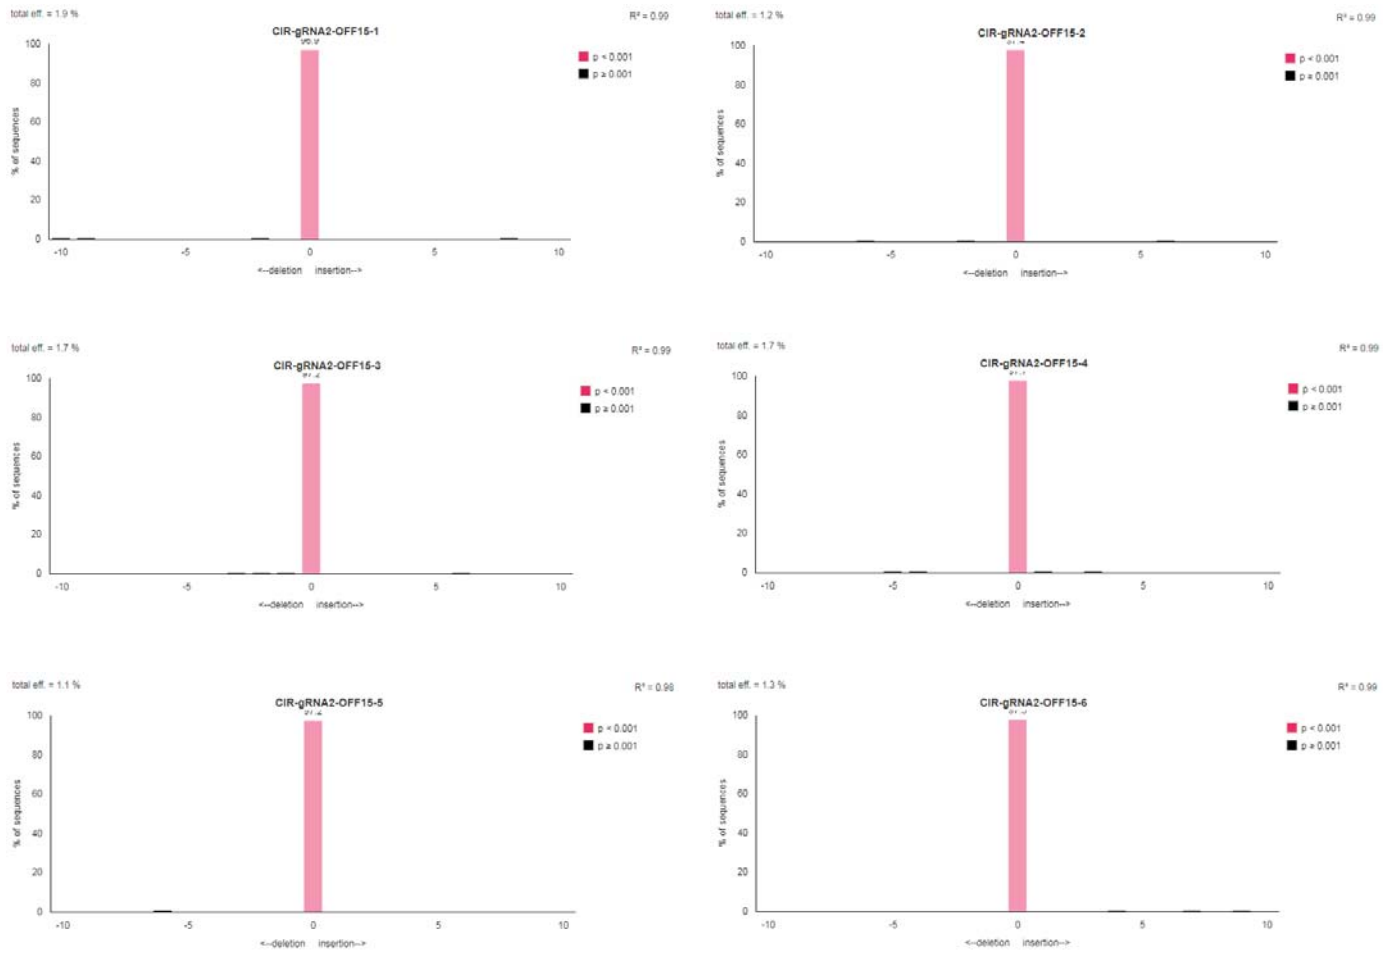

# gRNA2-OFF16

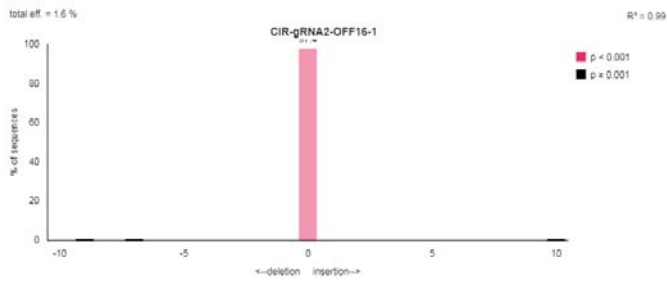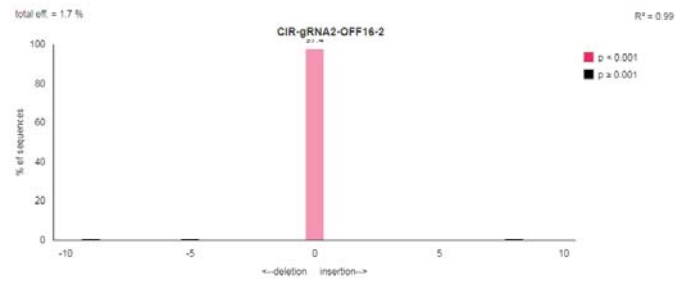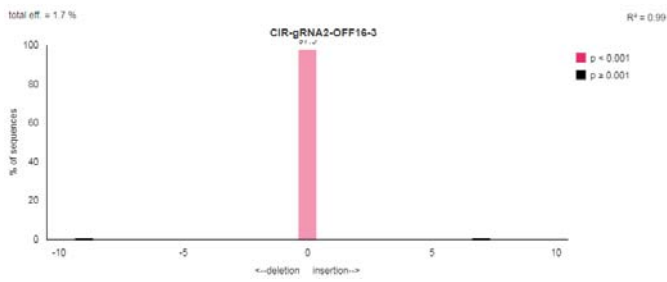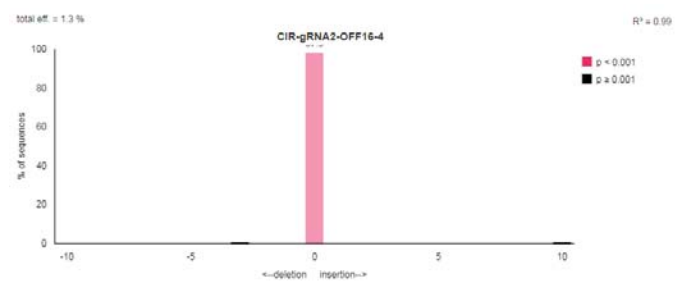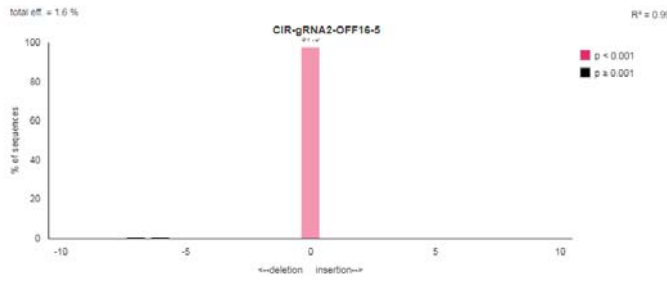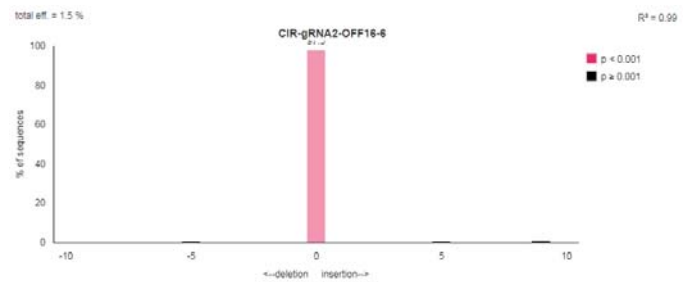

# gRNA2-OFF17

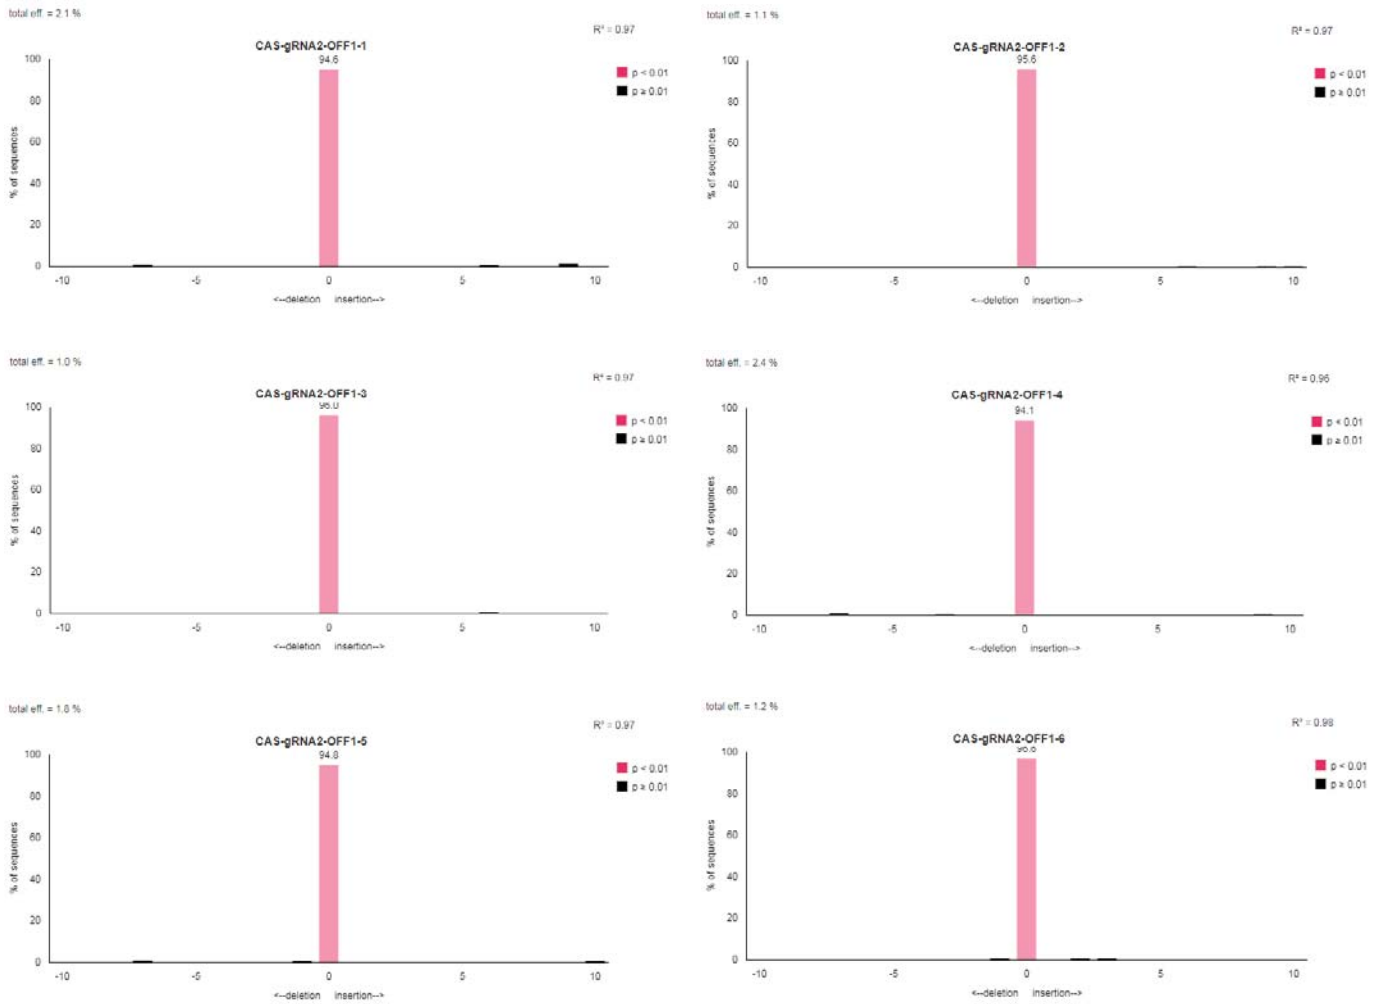

# gRNA2-OFF18

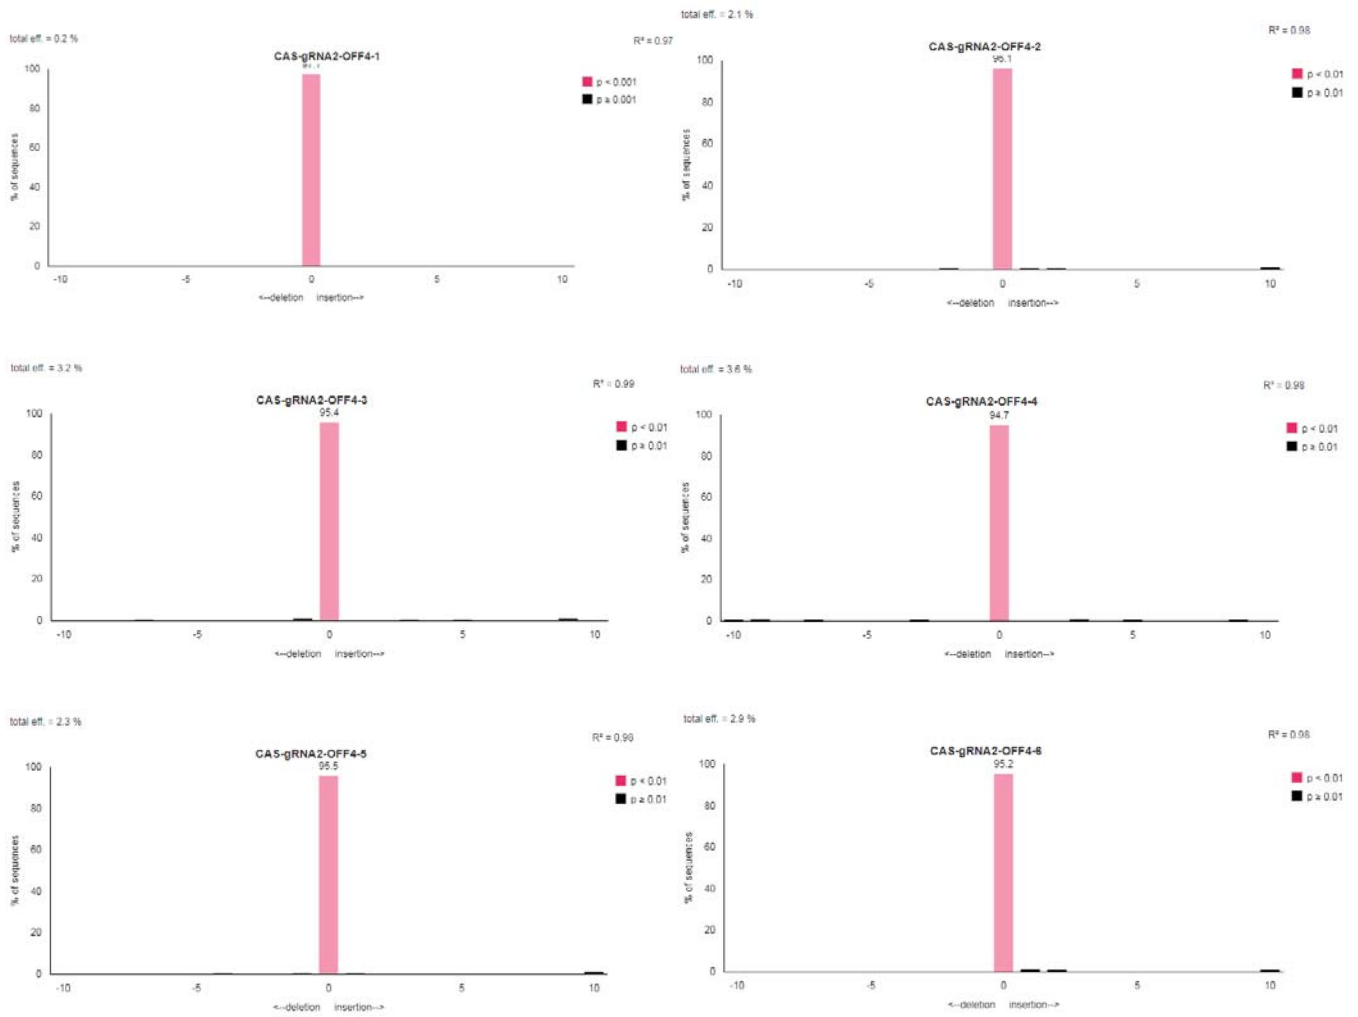

# gRNA2-OFF19

total eff. = 2.0 %

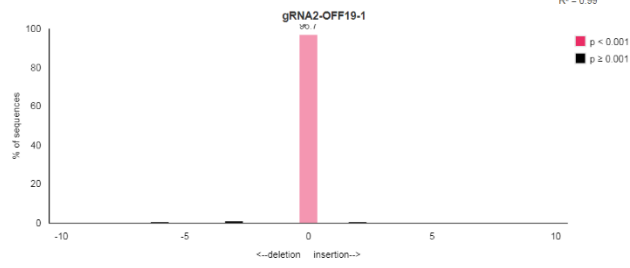

total eff. = 1.3 %

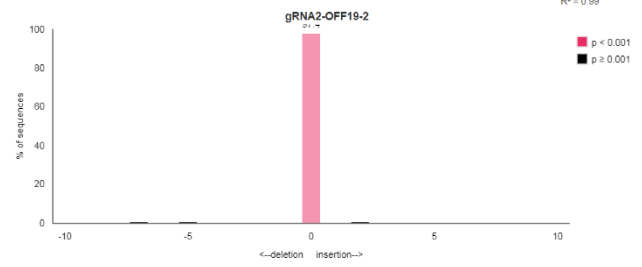

total eff. = 1.6 %

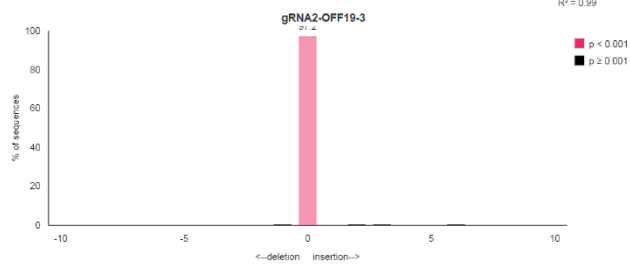

total eff. = 1.2 %

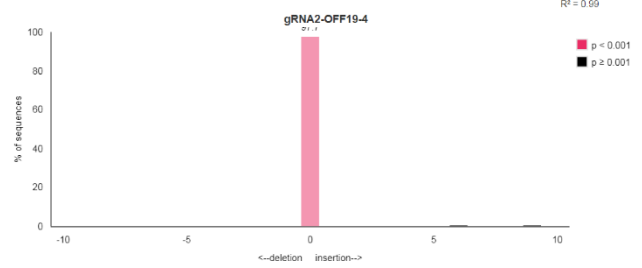

total eff. = 2.1 %

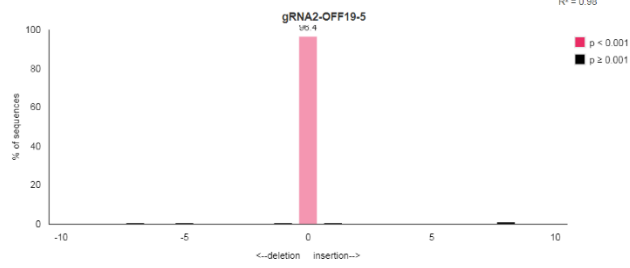

total eff. = 1.6 %

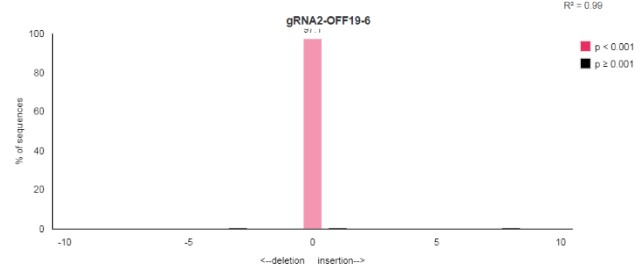

# gRNA2-OFF20

total eff. = 2.0 %

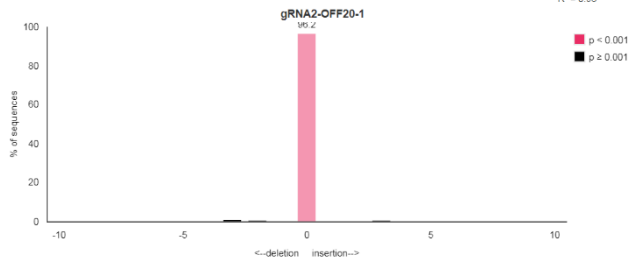

total eff. = 4.1 %

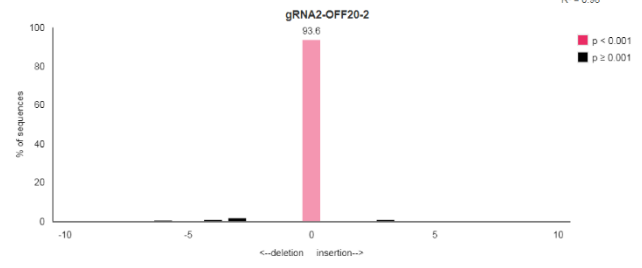

total eff. = 4.6 %

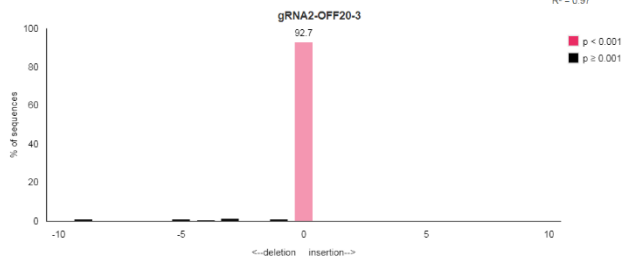

total eff. = 3.7 %

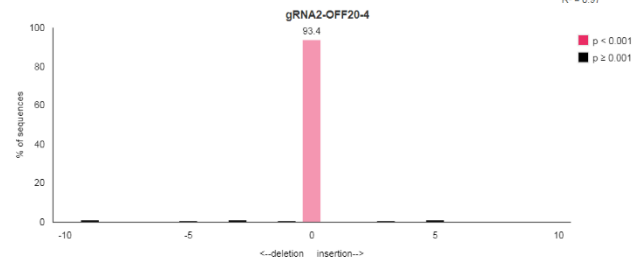

total eff. = 0.6 %

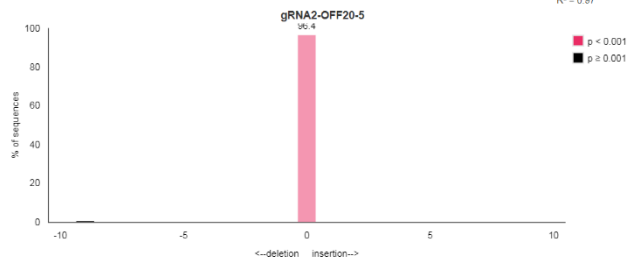

total eff. = 1.8 %

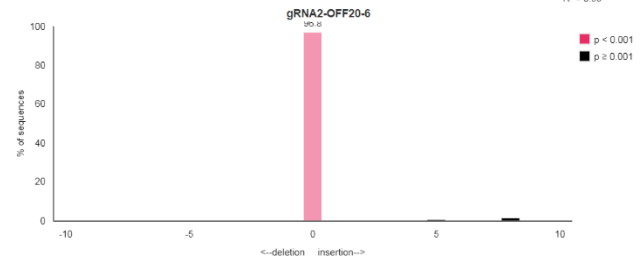

Supplement: PBI-17-362-s002.pdf [file PBI-17-362-s002.pdf]
