# Supplementary material
Source: PubMed Central journal article supplement (PMC11386801)
Supplement: PBI-17-362-s001.pdf [file PBI-17-362-s001.pdf]

**Table S1. Summary of off-targets predicted by CasOffinder.**

| <b>gRNA</b>         | <b>Target Sequence</b>       | <b>Gap</b> | <b>Mismatch</b> | <b># off-targets predicted</b> |
|---------------------|------------------------------|------------|-----------------|--------------------------------|
| crRNA1              | TTTNGTCACAGATCACAAACTTCAAAT  | 0          | 4               | 1                              |
| crRNA1              | TTTNGTCACAGATCACAAACTTCAAAT  | 0          | 5               | 10                             |
| crRNA1              | TTTNGTCACAGATCACAAACTTCAAAT  | -1         | 1               | 3                              |
| crRNA1              | TTTNGTCACAGATCACAAACTTCAAAT  | -1         | 2               | 1                              |
| crRNA1              | TTTNGTCACAGATCACAAACTTCAAAT  | -1         | 3               | 5                              |
| crRNA1              | TTTNGTCACAGATCACAAACTTCAAAT  | -1         | 4               | 74                             |
| crRNA1              | TTTNGTCACAGATCACAAACTTCAAAT  | -1         | 5               | 1099                           |
| <b>crRNA1 Total</b> |                              |            |                 | <b>1193</b>                    |
| crRNA2              | TTTNAACAAGTGGGGCGCAGATCCTGAG | -1         | 2               | 1                              |
| crRNA2              | TTTNAACAAGTGGGGCGCAGATCCTGAG | -1         | 3               | 3                              |
| crRNA2              | TTTNAACAAGTGGGGCGCAGATCCTGAG | -1         | 4               | 14                             |
| crRNA2              | TTTNAACAAGTGGGGCGCAGATCCTGAG | -1         | 5               | 155                            |
| <b>crRNA2 Total</b> |                              |            |                 | <b>173</b>                     |
| gRNA1               | ACAGATCACAAACTTCAAATGNGG     | 0          | 2               | 1                              |
| gRNA1               | ACAGATCACAAACTTCAAATGNGG     | 0          | 4               | 19                             |
| gRNA1               | ACAGATCACAAACTTCAAATGNGG     | 0          | 5               | 249                            |
| gRNA1               | ACAGATCACAAACTTCAAATGNGG     | -1         | 1               | 1                              |
| gRNA1               | ACAGATCACAAACTTCAAATGNGG     | -1         | 2               | 3                              |
| gRNA1               | ACAGATCACAAACTTCAAATGNGG     | -1         | 3               | 69                             |
| gRNA1               | ACAGATCACAAACTTCAAATGNGG     | -1         | 4               | 1083                           |
| gRNA1               | ACAGATCACAAACTTCAAATGNGG     | -1         | 5               | 17604                          |
| <b>gRNA1 Total</b>  |                              |            |                 | <b>19029</b>                   |
| gRNA2               | AAGTGGGCGCAGATCCTGAGNGG      | 0          | 2               | 12                             |
| gRNA2               | AAGTGGGCGCAGATCCTGAGNGG      | 0          | 3               | 357                            |
| gRNA2               | AAGTGGGCGCAGATCCTGAGNGG      | 0          | 4               | 3699                           |
| gRNA2               | AAGTGGGCGCAGATCCTGAGNGG      | 0          | 5               | 2255                           |
| gRNA2               | AAGTGGGCGCAGATCCTGAGNGG      | -1         | 1               | 13                             |
| gRNA2               | AAGTGGGCGCAGATCCTGAGNGG      | -1         | 2               | 378                            |
| gRNA2               | AAGTGGGCGCAGATCCTGAGNGG      | -1         | 3               | 4205                           |
| gRNA2               | AAGTGGGCGCAGATCCTGAGNGG      | -1         | 4               | 9280                           |
| gRNA2               | AAGTGGGCGCAGATCCTGAGNGG      | -1         | 5               | 51054                          |
| <b>gRNA2 Total</b>  |                              |            |                 | <b>71253</b>                   |

## Activities and specificities of CRISPR-Cas9 and Cas12a nucleases for targeted mutagenesis in maize

**Table S2. Oligonucleotides used in this study.**

| Forward primer                        | Sequence             | Reverse primer  | Sequence              | Sequencing primer | Sequence             |
|---------------------------------------|----------------------|-----------------|-----------------------|-------------------|----------------------|
| <b>On-target analysis</b>             |                      |                 |                       |                   |                      |
| Zm-g12-F2                             | CACAGCCTTGCAATCAATTC | Zm-g12-R2       | GCTGACGTGGAAGGAGTAGC  | ZmG12-exon2-F1    | ACACCGTGTCTTCGTCAAAA |
| ZmG12-exon2-F1                        | ACACCGTGTCTTCGTCAAAA | ZmG12-exon2-R1  | GACCAGCCACAGGTCTC     | ZmG12-exon2-F1    | ACACCGTGTCTTCGTCAAAA |
| <b>Cas9-gRNA1 off-target analysis</b> |                      |                 |                       |                   |                      |
| <b>CIRCLE-seq</b>                     |                      |                 |                       |                   |                      |
| CIRgRNA1-OFF1F                        | AGTGACTACATGGGGCAAC  | CIRgRNA1-OFF1R  | CTGGCGATGTCGATCTCTTT  | CIRgRNA1-OFF1seq  | CACTATCGCCCCCTTGATTA |
| CIRgRNA1-OFF2F                        | GAGCACGGTGACGCTATGTA | CIRgRNA1-OFF2R  | TTCGAAAGGATGTCAATCTGG | CIRgRNA1-OFF2seq  | CTCTCACTTGCTGGCAAAA  |
| CIRgRNA1-OFF4F                        | TGGGGAGACTGAACATAGCA | CIRgRNA1-OFF4R  | AGTGGTCCAGTCCCAACAG   | CIRgRNA1-OFF4seq  | TGCATATCCGACCAGAAACA |
| CIRgRNA1-OFF5F                        | GAATGTCAGACTCGCCTTCC | CIRgRNA1-OFF5R  | TCGCTGCTTCTGTCTCTAC   | CIRgRNA1-OFF5seq  | CACTTCCCCTAAAGCAAGCA |
| CIRgRNA1-OFF6F                        | GAATGCGGATGCTTTTGT   | CIRgRNA1-OFF6R  | GAGCTTTTGGGTTGGAGTT   | CIRgRNA1-OFF6seq  | TATGGTCTGCCATCTTTT   |
| CIRgRNA1-OFF7F                        | TGGGAATTGGTTTCTCTTG  | CIRgRNA1-OFF7R  | GGCATGGAACTGTCTTGCT   | CIRgRNA1-OFF7seq  | TGGGAATTGGTTTCTCTTG  |
| CIRgRNA1-OFF8F                        | AAACCCACGCTTCTGTAAA  | CIRgRNA1-OFF8R  | CTCCGCTAGCACTGAATC    | CIRgRNA1-OFF8seq  | GAATCGCCATGTAGAGCA   |
| CIRgRNA1-OFF9F                        | AATTGGAGGGAAGGCTAGGA | CIRgRNA1-OFF9R  | GAACCAAATGCGGAACTGT   | CIRgRNA1-OFF9seq  | TAGGATGGGAATGCTTGAGG |
| CIRgRNA1-OFF10F                       | AAGCAACCAACTGGCACTGT | CIRgRNA1-OFF10R | GGCAAGCGGTATTTTATCA   | CIRgRNA1-OFF10seq | TGGCACTGTTTATCTGTGC  |
| CIRgRNA1-OFF11F                       | CCTTTCAGATCGTCCTTTC  | CIRgRNA1-OFF11R | TTGGTGTTCCTCTCCATC    | CIRgRNA1-OFF11seq | GCCCCTAGCAAGAACCTTTT |
| CIRgRNA1-OFF12F                       | CCCGAAAGAAGGCTTACTA  | CIRgRNA1-OFF12R | GTTTTGTACCGGCTAACG    | CIRgRNA1-OFF12seq | ATTCCAACAGCTTGCTCCAC |
| CIRgRNA1-OFF13F                       | AGAGTGCCAAGGACAACACC | CIRgRNA1-OFF13R | TTGAGCAACCCTAAGCAAGG  | CIRgRNA1-OFF13seq | CGTGCCATTTATGAGTCCAA |
| CIRgRNA1-OFF14F                       | ACACAAAGAATGCGGGTGAT | CIRgRNA1-OFF14R | GGTTGGACCGTTGGAGACTA  | CIRgRNA1-OFF14seq | TGATTTGTTTCCGAGGTTT  |
| CIRgRNA1-OFF16F                       | TCCATTCCATTGATTGCTGA | CIRgRNA1-OFF16R | GGCCCTTCATGATCAGTGT   | CIRgRNA1-OFF16seq | GGAGAACCGTGTCTGTCTT  |
| CIRgRNA1-OFF17F                       | AAATGCTGGCCAAATTGTCT | CIRgRNA1-OFF17R | GTCCACCCATGCCTGATACT  | CIRgRNA1-OFF17seq | GGCCAAATTGTCTGAAAAGG |
| <b>Cas-OFFinder</b>                   |                      |                 |                       |                   |                      |
| CASgRNA1-OFF1F                        | GCAGGTTGGGAGACTGAAC  | CASgRNA1-OFF1R  | CAACCTACTGAACGGACCG   | CASgRNA1-OFF1seq  | GCAGGTTGGGAGACTGAAC  |
| CASgRNA1-OFF2F                        | GGACAGTTTTTCCCACCCCT | CASgRNA1-OFF2R  | CCTTCGTCGAGCAAGCTACA  | CASgRNA1-OFF2seq  | GGACAGTTTTTCCCACCCCT |
| <b>Cas9-gRNA2 off-target analysis</b> |                      |                 |                       |                   |                      |
| <b>CIRCLE-seq</b>                     |                      |                 |                       |                   |                      |
| CIRgRNA2-OFF3F                        | TTTTACCCACGCAGTCCAGT | CIRgRNA2-OFF3R  | AGCCCTGACAAGGACGTCTA  | CIRgRNA2-OFF3seq  | TTCCTTTGTCTCTCTCAGCA |
| CIRgRNA2-OFF7F                        | GTGCCAAAAGCAGCTTATCC | CIRgRNA2-OFF7R  | TGCATATAGCGCAAAGATG   | CIRgRNA2-OFF7seq  | GCCTTTGCTTGTGCGATAAT |
| CIRgRNA2-OFF8F                        | TTGGTTGAGAGGGTTTCAGC | CIRgRNA2-OFF8R  | CGGTCCATACCATGACACAG  | CIRgRNA2-OFF8seq  | GGTCCGTTTGAGATTGAGAA |

## Activities and specificities of CRISPR-Cas9 and Cas12a nucleases for targeted mutagenesis in maize

**Table S2. Oligonucleotides used in this study.**

| <b>Forward primer</b>  | <b>Sequence</b>       | <b>Reverse primer</b> | <b>Sequence</b>       | <b>Sequencing primer</b> | <b>Sequence</b>       |
|------------------------|-----------------------|-----------------------|-----------------------|--------------------------|-----------------------|
| CIRgRNA2-OFF12F        | GACCACTTCCCACTCACAGA  | CIRgRNA2-OFF12R       | ACCCAGAAAGGGAAAAGGAG  | CIRgRNA2-OFF12seq        | GTGTCCTCGCGCAACACTA   |
| CIRgRNA2-OFF13F        | CATCGCGCCTTCTCATCTAT  | CIRgRNA2-OFF13R       | CTGGTGCTCTTTCCCTCTG   | CIRgRNA2-OFF13seq        | TAATGAGTGGGACCCCTGTGG |
| CIRgRNA2-OFF14F        | CTTCTTCTTGCCACCAGAC   | CIRgRNA2-OFF14R       | GTCGGCGATGTAGGTCGATA  | CIRgRNA2-OFF14seq        | GCACCTGCATCACCTAGCC   |
| CIRgRNA2-OFF15F        | CCTTCCCTCTTCTGGTCTCC  | CIRgRNA2-OFF15R       | AGGATCCGCATCTCCTTCTT  | CIRgRNA2-OFF15seq        | CGCTCTCAGATCCCTCTCC   |
| CIRgRNA2-OFF16F        | TTTATCAGCTTCGGGTCGAT  | CIRgRNA2-OFF16R       | GAAAGCTCCCTCGGAAACTC  | CIRgRNA2-OFF16seq        | GCTCAAGCCACGATGTATCA  |
| CIRgRNA2-OFF17F        | GCCTGCTTTAGCTCGCTATG  | CIRgRNA2-OFF17R       | TCAAGTTCTCCCGTGGAGTT  | CIRgRNA2-OFF17seq        | CATACTTGCCCGATCCTAT   |
| CIRgRNA2-OFF19F        | CCAAAAGGGGTGGAGTTTTA  | CIRgRNA2-OFF19R       | CCGTTTACGTAGGAGCATT   | CIRgRNA2-OFF19seq        | TGGCCAGGCCTATTGTGTTA  |
| CIRgRNA2-OFF21F        | TCTGATGATGGCATTCTCGA  | CIRgRNA2-OFF21R       | GCTTTAGCACCTGGAAAGCA  | CIRgRNA2-OFF21seq        | GAGAAGCATTGTTTCATTTGC |
| CIRgRNA2-OFF22F        | GACGGTGTACGGCAACAA    | CIRgRNA2-OFF22R       | TTGTGCTTGTGTGATGGTG   | CIRgRNA2-OFF22seq        | CGTCGACTTTCTCCGTGAAG  |
| CIRgRNA2-OFF23F        | CTGGCATTGCACAGTCGTAT  | CIRgRNA2-OFF23R       | GTCGCAAATCCTTGATCCAC  | CIRgRNA2-OFF23seq        | AGTCGTATCGTGGTCTCTCG  |
| CIRgRNA2-OFF24F        | CAGGGTTATTGGTGGGAGTG  | CIRgRNA2-OFF24R       | ACTACTCGCGGATGGAGTTG  | CIRgRNA2-OFF24seq        | AAGAGGGACCATCTGCTGTG  |
| CIRgRNA2-OFF25F        | GGGAGTGTACGCAACTTCCTA | CIRgRNA2-OFF25R       | TGGCTGCTTGTACTGTTCAC  | CIRgRNA2-OFF25seq        | TGGGGTATTTGGTTTCATCC  |
| CIRgRNA2-OFF28F        | GGTTTGCAGAGGTGGTACT   | CIRgRNA2-OFF28R       | CCAGGATGGCTATGAAGCTC  | CIRgRNA2-OFF28seq        | GTGAAGTCCCTGGACGAATG  |
| CIRgRNA2-OFF29F        | TTTGCAGCCTCGTCTGTCTA  | CIRgRNA2-OFF29R       | TCCCAAGTCCACACTCTCCT  | CIRgRNA2-OFF29seq        | CAACCATGCCACATGAGTA   |
| CIRgRNA2-OFF32F        | AATTTTGGTTTCTCGGATCG  | CIRgRNA2-OFF32R       | ATACCCCTCCGTTTTGTCTT  | CIRgRNA2-OFF32seq        | TCGGATCGCGTGATACTACA  |
| CIRgRNA2-OFF36F        | GTCTTACGACGGTCACCA    | CIRgRNA2-OFF36R       | CAGGTCACCAGCTTCAAGTGT | CIRgRNA2-OFF36seq        | GTGACGTGGAAGGAGAAGGA  |
| CIRgRNA2-OFF38F        | GCTAATAATTTCCCGCAACG  | CIRgRNA2-OFF38R       | TGGATAGACTGGACTGGATGG | CIRgRNA2-OFF38seq        | GAGACCGACGGACCTGTAAA  |
| CIRgRNA2-OFF39F        | CTCCAGAGGGAGGACAAATG  | CIRgRNA2-OFF39R       | CCGTCGTTAGGCAAAAACAC  | CIRgRNA2-OFF39seq        | AGGGAGGACAAATGCCAAG   |
| CIRgRNA2-OFF41F        | AAACCTGACCCTGATCCAAA  | CIRgRNA2-OFF41R       | AGTAGAAATCCGGCGAACCT  | CIRgRNA2-OFF41seq        | TCCCTGCTGCAATGTC      |
| CIRgRNA2-OFF46F        | AGCTCAGGTACACGCTGCTC  | CIRgRNA2-OFF46R       | CGGGTCTTTCTGGTCTTCAA  | CIRgRNA2-OFF46seq        | GAGCTCAAACGCTTCGCTAT  |
| CIRgRNA2-OFF49F        | TCACGAAAGGAACGAAAGGT  | CIRgRNA2-OFF49R       | TTTTCCATGGAGCCAGATTC  | CIRgRNA2-OFF49seq        | CGATGAGCACCAGTCATTGT  |
| CIRgRNA2-OFF54F        | GTGTCCCTGTTTCCATGACC  | CIRgRNA2-OFF54R       | ACATAGCCCTCCCTTAGCAT  | CIRgRNA2-OFF54seq        | GGGTGTTAGGGAGGGAGAAG  |
| <b>Cas-OFFinder</b>    |                       |                       |                       |                          |                       |
| CASgRNA2-OFF1F         | TAGGCAGACAATGAGCCAAA  | CASgRNA2-OFF1R        | TAGATCGAGAAGGCGTCTCTG | CASgRNA2-OFF1seq         | CCAAAATAACCTGAGCGATCT |
| CASgRNA2-OFF4F         | CCGAGATAAGACACTGACG   | CASgRNA2-OFF4R        | GTGACGTGGAAGGAGAAGGA  | CASgRNA2-OFF4seq         | CAAGACGACGTGTTCTGCTAA |
| <b>T-DNA screening</b> |                       |                       |                       |                          |                       |
| zCas9-F                | CCGATTCTGGAGAAGATGGA  | zCas9-R               | TCGAAGAGATGGGCGTAAGT  |                          |                       |
| LbCas12a-F             | AATGGAACCGGGAGTATGAC  | LbCas12a-R            | ACATGTCGCCCTTCTTGAAC  |                          |                       |

## Activities and specificities of CRISPR-Cas9 and Cas12a nucleases for targeted mutagenesis in maize

**Table S2. Oligonucleotides used in this study.**

| <b>Forward primer</b>      | <b>Sequence</b>                           | <b>Reverse primer</b> | <b>Sequence</b> | <b>Sequencing primer</b> | <b>Sequence</b>                       |
|----------------------------|-------------------------------------------|-----------------------|-----------------|--------------------------|---------------------------------------|
| <b>Vector construction</b> |                                           |                       |                 |                          |                                       |
| LNK-165-F-NEW              | CATGGGGTACCCAATTGTTCCGGAACCTCTAGATAAGCTTA |                       |                 |                          |                                       |
| LNK-165-R-NEW              | CCGGTAAGCTTATCTAGAGTTCGGAACAATTGGGTACCC   |                       |                 |                          |                                       |
| zCas9-F-NcoI               | TGGACCATGGATTACAAGGACCACGACGGGGATTA       |                       |                 |                          |                                       |
| zCas9-R-SacI               | GTCGAAACCGATGATACGAACGAA                  |                       |                 |                          |                                       |
| ZmGL2-crRNA1-F             | TAGATGTCACAGATCACAAACTTCAAAT              |                       |                 |                          |                                       |
| ZmGL2-crRNA1-R             | GGCCATTTGAAGTTTGTGATCTGTGACA              |                       |                 |                          |                                       |
| ZmGL2-crRNA2-F             | TAGATAACAAGTGGGCGCAGATCCTGAG              |                       |                 |                          |                                       |
| ZmGL2-crRNA2-R             | GGCCCTCAGGATCTGCGCCCACTTGTTA              |                       |                 |                          |                                       |
| ZmGL2-gR3-F                | TGGCACAGATCACAAACTTCAAATG                 |                       |                 |                          |                                       |
| ZmGL2-gR3-R                | AAACCATTTGAAGTTTGTGATCTGT                 |                       |                 |                          |                                       |
| ZmGL2-gR4-F                | TGGCAAGTGGGCGCAGATCCTGAG                  |                       |                 |                          |                                       |
| ZmGL2-gR4-R                | AAACCTCAGGATCTGCGCCCACTT                  |                       |                 |                          |                                       |
| <b>CIRCLE-seq</b>          |                                           |                       |                 |                          |                                       |
| oSQT1288                   | P-CGGTGGACCGATGATCUATCGGTCCACCG*T         |                       |                 |                          | *indicates a phosphorothioate linkage |

## Activities and specificities of CRISPR-Cas9 and Cas12a nucleases for targeted mutagenesis in maize

Table S3. Summary of genotyping results of T0 and T1 lines.

| Construct | Event | Plant | T0 genotype  |              | Method  | #clone  | Genotype of T1 progenies (pollen donor was wild-type)  | Method | Off-target mutations |
|-----------|-------|-------|--------------|--------------|---------|---------|--------------------------------------------------------|--------|----------------------|
| A842B     | 1     | 1     | WT           | (0, 0)       | Cloning | 7       |                                                        |        |                      |
| A842B     | 1     | 2     | WT           | (0, 0)       | Cloning | 7       | (0, 0) x 7                                             | TIDE   |                      |
| A842B     | 1     | 3     | Heterozygous | (0, -9)      | Cloning | 2, 6    |                                                        |        |                      |
| A842B     | 1     | 4     | Mosaic       | (0, -7, -9)  | Cloning | 5, 1, 2 | (0,-9), (+1, -8)                                       | TIDE   |                      |
| A842B     | 1     | 5     | Heterozygous | (0, -73)     | Cloning | 7, 1    |                                                        | TIDE   |                      |
| A842B     | 2     | 1     | Heterozygous | (0, -11)     | TIDE    |         |                                                        | TIDE   |                      |
| A842B     | 2     | 2     | Heterozygous | (0, -12+1)   | TIDE    |         | (+1, -10) x 3, (0, -11) x 4                            | TIDE   |                      |
| A842B     | 2     | 3     | Heterozygous | (0, -9)      | TIDE    |         |                                                        |        |                      |
| A842B     | 2     | 4     | WT           | (0, 0)       | TIDE    |         |                                                        |        |                      |
| A842B     | 2     | 5     | Heterozygous | 0/-11        | TIDE    |         |                                                        |        |                      |
| A842B     | 3     | 1     | WT           | (0, 0)       | TIDE    |         |                                                        |        |                      |
| A842B     | 3     | 2     | WT           | (0, 0)       | TIDE    |         |                                                        |        |                      |
| A842B     | 3     | 3     | WT           | (0, 0)       | TIDE    |         |                                                        |        |                      |
| A842B     | 3     | 4     | WT           | (0, 0)       | TIDE    |         |                                                        |        |                      |
| A842B     | 3     | 5     | WT           | (0, 0)       | TIDE    |         |                                                        |        |                      |
| A842B     | 5     | 1     | Heterozygous | (0, +1)      | TIDE    |         | (+1, -6), (+2, -7), (+1, -8), (0, -7) x 2, (0, -9) x 2 | TIDE   |                      |
| A842B     | 5     | 3     | Mosaic       | (+1, -8, -9) | TIDE    |         |                                                        |        |                      |
| A842B     | 5     | 4     | Heterozygous | (0, +1)      | TIDE    |         |                                                        |        |                      |
| A842B     | 5     | 5     | Biallelic    | (-6, -9)     | TIDE    |         |                                                        |        |                      |
| A842B     | 5     | 7     | Heterozygous | (0, -9)      | TIDE    |         |                                                        |        |                      |
| A843B     | 1     | 1     | WT           | (0, 0)       | Cloning | 7       |                                                        |        |                      |
| A843B     | 1     | 2     | WT           | (0, 0)       | Cloning | 8       |                                                        |        |                      |
| A843B     | 1     | 3     | WT           | (0, 0)       | Cloning | 8       |                                                        |        |                      |
| A843B     | 1     | 4     | WT           | (0, 0)       | Cloning | 5       |                                                        |        |                      |
| A843B     | 2     | 1     | WT           | (0, 0)       | Cloning | 8       |                                                        |        |                      |
| A843B     | 2     | 2     | WT           | (0, 0)       | Cloning | 8       | (0, 0) x 7                                             | TIDE   |                      |
| A843B     | 2     | 3     | WT           | (0, 0)       | Cloning | 8       |                                                        |        |                      |
| A843B     | 2     | 4     | WT           | (0, 0)       | Cloning | 8       |                                                        |        |                      |
| A843B     | 2     | 5     | WT           | (0, 0)       | Cloning | 6       |                                                        |        |                      |
| A843B     | 3     | 1     | WT           | (0, 0)       | Cloning | 5       |                                                        |        |                      |
| A843B     | 3     | 2     | WT           | (0, 0)       | Cloning | 5       | (0, 0) x 7                                             | TIDE   |                      |
| A843B     | 3     | 3     | WT           | (0, 0)       | Cloning | 7       |                                                        |        |                      |
| A843B     | 3     | 4     | WT           | (0, 0)       | Cloning | 3       |                                                        |        |                      |
| A843B     | 3     | 5     | WT           | (0, 0)       | Cloning | 7       |                                                        |        |                      |
| A843B     | 3     | 6     | WT           | (0, 0)       | TIDE    |         |                                                        |        |                      |
| A843B     | 4     | 1     | WT           | (0, 0)       | TIDE    |         |                                                        |        |                      |
| A843B     | 4     | 2     | WT           | (0, 0)       | TIDE    |         |                                                        |        |                      |
| A843B     | 4     | 3     | WT           | (0, 0)       | TIDE    |         |                                                        |        |                      |
| A843B     | 4     | 4     | WT           | (0, 0)       | TIDE    |         |                                                        |        |                      |
| A843B     | 4     | 5     | WT           | (0, 0)       | TIDE    |         |                                                        |        |                      |
| A843B     | 4     | 6     | WT           | (0, 0)       | TIDE    |         |                                                        |        |                      |
| A843B     | 6     | 1     | WT           | (0, 0)       | TIDE    |         |                                                        |        |                      |
| A843B     | 6     | 2     | WT           | (0, 0)       | TIDE    |         |                                                        |        |                      |
| A844B     | 1     | 1     | Heterozygous | (0, -7)      | TIDE    |         |                                                        |        |                      |
| A844B     | 1     | 2     | Homozygous   | (-7, -7)     | TIDE    |         |                                                        |        |                      |
| A844B     | 1     | 3     | Homozygous   | (-7, -7)     | TIDE    |         |                                                        |        |                      |
| A844B     | 1     | 4     | Homozygous   | (-7, -7)     | TIDE    |         | (+2, -7), (-7, -6), (-1, -7), (0, -7)                  | TIDE   | NO                   |
| A844B     | 1     | 5     | Homozygous   | (-7, -7)     | TIDE    |         |                                                        |        |                      |
| A844B     | 2     | 1     | Homozygous   | (+1, +1)     | TIDE    |         |                                                        |        |                      |
| A844B     | 2     | 2     | Homozygous   | (+1, +1)     | TIDE    |         |                                                        |        |                      |
| A844B     | 2     | 3     | Homozygous   | (+1, +1)     | TIDE    |         |                                                        |        |                      |
| A844B     | 2     | 4     | Homozygous   | (+1, +1)     | TIDE    |         |                                                        |        |                      |
| A844B     | 2     | 5     | Homozygous   | (+1, +1)     | TIDE    |         | (0,+1) x3                                              | TIDE   | NO                   |
| A844B     | 3     | 2     | Homozygous   | (-2, -2)     | TIDE    |         | (-2,-1), (-2,-5), (-2,-6), (-2,-2), (-2, +1)           | TIDE   | NO                   |
| A844B     | 3     | 4     | Homozygous   | (-2, -2)     | Cloning | 8       | (-2,+1) x 3, (-2,-2)                                   | TIDE   | NO                   |
| A844B     | 3     | 5     | Homozygous   | (+1, +1)     | Cloning | 6       |                                                        |        |                      |

## Activities and specificities of CRISPR-Cas9 and Cas12a nucleases for targeted mutagenesis in maize

| Construct | Event | Plant | T0 genotype  | Method     | #clone  | Genotype of T1 progenies (pollen donor was wild-type) | Method                                                                    | Off-target mutations |    |
|-----------|-------|-------|--------------|------------|---------|-------------------------------------------------------|---------------------------------------------------------------------------|----------------------|----|
| A844B     | 5     | 1     | Heterozygous | (0, +1)    | TIDE    |                                                       |                                                                           |                      |    |
| A844B     | 5     | 2     | Biallelic    | (+1, -6)   | TIDE    | (+1, +1) x 2, (+1, -2), (0, -6)                       | TIDE                                                                      |                      |    |
| A844B     | 6     | 1     | Heterozygous | (0, +1)    | TIDE    | (-1, -7), (-7, -7), (0, 0)                            | TIDE                                                                      | NO                   |    |
| A844B     | 6     | 2     | Heterozygous | (0, +1)    | TIDE    |                                                       |                                                                           |                      |    |
| A844B     | 6     | 3     | Heterozygous | (0, +1)    | TIDE    |                                                       |                                                                           |                      |    |
| A844B     | 6     | 4     | Heterozygous | (0, +1)    | TIDE    |                                                       |                                                                           |                      |    |
| A844B     | 6     | 5     | Heterozygous | (0, +1)    | TIDE    |                                                       |                                                                           |                      |    |
| A844B     | 7     | 1     | Heterozygous | (0, +1)    | TIDE    |                                                       |                                                                           |                      |    |
| A844B     | 7     | 2     | Heterozygous | (0, +1)    | TIDE    | (+1, -1), (+1, -3), (+1, +1)x2, (0, +1)               | TIDE                                                                      | NO                   |    |
| A844B     | 8     | 1     | Biallelic    | (+1, -2)   | TIDE    |                                                       |                                                                           |                      |    |
| A844B     | 8     | 2     | Biallelic    | (+1, -2)   | TIDE    | (-2, -5), (-1, -4), (0, +1), (0, -2)x3                | TIDE                                                                      | NO                   |    |
| A844B     | 8     | 3     | Heterozygous | (0, +1)    | TIDE    |                                                       |                                                                           |                      |    |
| A844B     | 8     | 4     | Biallelic    | (+1, -2)   | TIDE    |                                                       |                                                                           |                      |    |
| A844B     | 8     | 5     | Biallelic    | (+1, -2)   | TIDE    |                                                       |                                                                           |                      |    |
| A845B     | 1     | 1     | WT           | (0, 0)     | Cloning | 8                                                     |                                                                           |                      |    |
| A845B     | 1     | 2     | WT           | (0, 0)     | Cloning | 6                                                     |                                                                           |                      |    |
| A845B     | 2     | 1     | Homozygous   | (-6, -6)   | Cloning | 5                                                     |                                                                           |                      |    |
| A845B     | 2     | 2     | Biallelic    | (-6, -4+1) | Cloning | 6, 2                                                  |                                                                           |                      |    |
| A845B     | 2     | 3     | Biallelic    | (-6, -4+1) | Cloning | 4, 3                                                  |                                                                           |                      |    |
| A845B     | 2     | 4     | Biallelic    | (-6, -4+1) | Cloning | 4, 4                                                  | (-2, -5), (0, -6), (0, -3) x 2                                            | TIDE                 | NO |
| A845B     | 2     | 5     | Biallelic    | (-6, -4+1) | Cloning | 5, 3                                                  |                                                                           |                      |    |
| A845B     | 3     | 1     | Biallelic    | (-2, -5)   | Cloning | 4, 4                                                  |                                                                           |                      |    |
| A845B     | 3     | 2     | Biallelic    | (-2, -5)   | Cloning | 1, 5                                                  |                                                                           |                      |    |
| A845B     | 3     | 3     | Biallelic    | (-2, -5)   | Cloning | 5, 3                                                  | (-2, -2), (-2, -13), (-2, -15), (-2, -24), (-5, -5), (-5, -24), (-5, -27) | TIDE                 | NO |
| A845B     | 3     | 4     | Biallelic    | (-2, -5)   | Cloning | 1, 7                                                  | (-2, -2), (-5, -1)                                                        | TIDE                 | NO |
| A845B     | 3     | 5     | Biallelic    | (-2, -5)   | Cloning | 4, 3                                                  |                                                                           |                      |    |
| A845B     | 3     | 6     | Biallelic    | (-2, -5)   | Cloning | 5, 3                                                  |                                                                           |                      |    |
| A845B     | 4     | 1     | Biallelic    | (-2, -4)   | Cloning | 10, 9                                                 | (-4, -1) x 2, (-4, -5), (0, -4)                                           | TIDE                 | NO |
| A845B     | 4     | 3     | Biallelic    | (-2, -4)   | Cloning | 4, 2                                                  | (-2, -2), (-4, -1), (-4, +4), (0, -4)x2                                   | TIDE                 | NO |
| A845B     | 4     | 4     | Biallelic    | (-2, -4)   | Cloning | 2, 4                                                  |                                                                           |                      |    |
| A845B     | 5     | 1     | Biallelic    | (-2, -3)   | Cloning | 4, 2                                                  |                                                                           |                      |    |
| A845B     | 5     | 2     | Biallelic    | (-2, -3)   | Cloning | 5, 3                                                  |                                                                           |                      |    |
| A845B     | 5     | 3     | Biallelic    | (-2, -3)   | Cloning | 1, 5                                                  | (-1, -4), (-3, -9), (-3, -16), (-3, -6), (0, -3)                          | TIDE                 | NO |
| A845B     | 6     | 1     | Homozygous   | (-6, -6)   | Cloning | 8                                                     |                                                                           |                      |    |
| A845B     | 6     | 2     | Homozygous   | (-6, -6)   | Cloning | 8                                                     |                                                                           |                      |    |
| A845B     | 6     | 3     | Homozygous   | (-6, -6)   | Cloning | 8                                                     |                                                                           |                      |    |
| A845B     | 6     | 4     | Homozygous   | (-6, -6)   | Cloning | 6                                                     | (-1, -6)x2, (0, -6)                                                       | TIDE                 | NO |
| A845B     | 6     | 5     | Homozygous   | (-6, -6)   | Cloning | 7                                                     |                                                                           |                      |    |
| A845B     | 7     | 1     | Biallelic    | (-1, -6)   | TIDE    |                                                       |                                                                           |                      |    |
| A845B     | 7     | 3     | Biallelic    | (-1, -6)   | TIDE    | (-1, -1), (-2, +1), (-1, -5), (-1, -6)                | TIDE                                                                      | NO                   |    |
| A845B     | 8     | 1     | Heterozygous | (0, -6)    | Cloning | 7, 1                                                  |                                                                           |                      |    |
| A845B     | 8     | 2     | Heterozygous | (0, -4)    | Cloning | 7, 1                                                  |                                                                           |                      |    |
| A845B     | 8     | 3     | WT           | (0, 0)     | Cloning | 8                                                     | (-7, -20), (0, -4), (0, 0)x2                                              | TIDE                 | NO |
| A845B     | 8     | 5     | Heterozygous | (0, -3)    | Cloning | 6, 1                                                  |                                                                           |                      |    |
| A845B     | 10    | 2     | Heterozygous | (0, -6)    | TIDE    | (0, -6), (0, 0)                                       | TIDE                                                                      | NO                   |    |

## Activities and specificities of CRISPR-Cas9 and Cas12a nucleases for targeted mutagenesis in maize

**Table S4. List of off-targets identified by CIRCLE-seq and Cas-OFFinder.**

| Off-target                        | Chr.           | OFF-target position | Strand    | # mis-match es | Gap | CIRCLE-seq read | Off-target sequence           | F primer              | R primer             | Sequencing primer     | Sequencing ID |
|-----------------------------------|----------------|---------------------|-----------|----------------|-----|-----------------|-------------------------------|-----------------------|----------------------|-----------------------|---------------|
| <b>Cas12a-crRNA1: CasOFFinder</b> |                |                     |           |                |     |                 |                               |                       |                      |                       |               |
| 1                                 | CAScrRNA1-OFF1 | chr2                | 16677669  | -              | 3   | -1              | TTTCTTCCAGATCATAAAATTCAAAT    | CACTATCGCCCCCTTGATTA  | CTGGCGATGTCGATCTCTTT | CACTATCGCCCCCTTGATTA  | gRNA1-OFF1    |
| <b>Cas9-gRNA1: CIRCLE-seq</b>     |                |                     |           |                |     |                 |                               |                       |                      |                       |               |
| 1                                 | CIRgRNA1-OFF1  | chr8                | 74971851  | -              | 2   | -1              | 754 A-AGATCACAAAGCTCAAATGAGG  | CACTATCGCCCCCTTGATTA  | CTGGCGATGTCGATCTCTTT | CACTATCGCCCCCTTGATTA  | gRNA1-OFF1    |
| 2                                 | Target         | chr2                | 8112521   | -              | 0   |                 | 672 ACAGATCACAAACTTCAAATGCCG  | CACAGCCTTGCAATCAATTC  | GCTGACGTGAAGGAGTAGC  | ACACCGTGCTTCGTCAAAA   |               |
| 3                                 | CIRgRNA1-OFF2  | chr10               | 41964030  | -              | 6   |                 | 236 GTTTAACACAAACTTCAAATTTGG  | TTGATGGTCATCAGTTTGGTG | TTCGAAAGGATGCAATCTGG | TTGATGGTCATCAGTTTGGTG | gRNA1-OFF2    |
| 4                                 | CIRgRNA1-OFF3  | chr2                | 143072090 | +              | 6   |                 | 80 TTTGAACACGAACTTCAATGGGG    | NA                    | NA                   | NA                    |               |
| 5                                 | CIRgRNA1-OFF4  | chr3                | 107726662 | +              | 3   | -1              | 60 ACAATCATAAACTTCAA-TGTGG    | TTGAAAACCATCCTGGTGCT  | TCTTGACAGGACATAGCAAA | TTGAAAACCATCCTGGTGCT  | gRNA1-OFF3    |
| 6                                 | CIRgRNA1-OFF5  | chr3                | 108808715 | +              | 2   |                 | 56 ACAGATCACAAAGTCAAATGTGG    | GAATGTCAGACTCGCCTTCC  | TCGCTGCTTCTGCTGTCTAC | CACCTCCCTAAAGCAAGCA   | gRNA1-OFF4    |
| 7                                 | CIRgRNA1-OFF6  | chr3                | 1731070   | -              | 3   | -1              | 44 ATAGACCACAA-CTTCAAATGGG    | GAATGCGGATGCTTTTGTTT  | GAGCCTTTTGGGTTGGAGTT | TATGGGTCGTGCCATCTTTT  | gRNA1-OFF5    |
| 8                                 | CIRgRNA1-OFF7  | chr1                | 34341100  | -              | 4   |                 | 36 TCAGATTACAAATTTCAAATGAGG   | TGGAAATTTGGTTTCTCTTTG | GGCATGGAAACTGTCTTGCT | TGGGAATTTGGTTTCTCTTTG | gRNA1-OFF6    |
| 9                                 | CIRgRNA1-OFF8  | chr4                | 103904220 | -              | 3   | -1              | 30 AAAAAATCACAAACTTCAATA-GGGG | TGGTAAACAAACCGGGTCTAA | CTCCCGCTAGCACTTGAATC | CTCCCGCTAGCACTTGAATC  | gRNA1-OFF7    |
| 10                                | CIRgRNA1-OFF9  | chr10               | 52293332  | +              | 7   |                 | 28 AACGATCAAAAACCTTCAATATGGT  | CCCACAGCCCCACTAATACA  | CATGCAATTGAGCTGGAGAA | CCCACAGCCCCACTAATACA  | gRNA1-OFF8    |
| 11                                | CIRgRNA1-OFF10 | chr2                | 119407415 | +              | 3   | 1               | 24 CGAAATCACAAAGTCCAATGGGG    | TTTGAAACATTGCAGCATGA  | TCAAATGCAGCAGGTCAGTC | TTTGAAACATTGCAGCATGA  | gRNA1-OFF9    |
| 12                                | CIRgRNA1-OFF11 | chr8                | 72728483  |                | 7   |                 | 24 TTTAAACACAAACTTCAATTTGGG   | GCCCTTAGCAAGAACCTTTT  | CACCATTCCCGCACTCTAAT | GCCCTTAGCAAGAACCTTTT  | gRNA1-OFF10   |
| 13                                | CIRgRNA1-OFF12 | chr5                | 134878299 | -              | 4   | -1              | 50 ATCAATCACAAA-TTCAAATATGG   | CCCAGAAAGAGGCTTCACTA  | GTTTTTGATCCCGCCTAACG | ATTCCAAACAGTTGCTCCAC  | gRNA1-OFF13   |
| 14                                | CIRgRNA1-OFF13 | scaffold5.1434      | 9927      | +              | 7   |                 | 154 TTTAATCACAAACTTCAATATGGG  | AGAGTCCAAAGGACAACACC  | TTGAGCAACCTTAAGCAAGG | CGTGCCATTTATGAGTCCAA  | gRNA1-OFF14   |
| 15                                | CIRgRNA1-OFF14 | scaffold3.573       | 33430     | -              | 3   | -1              | 132 AATGATCACAACTTCAAATGTGG   | ACACAAAGAAATGCGGGTGAT | GGTTGGACCGTTGGAGACTA | TGATTTGTTTCCCGAGGTTT  | gRNA1-OFF15   |
| 16                                | CIRgRNA1-OFF15 | scaffold7.852       | 31292     | -              | 5   |                 | 124 TTTGAACACAAACTTCAATGGGG   | NA                    | NA                   | NA                    |               |
| 17                                | CIRgRNA1-OFF16 | scaffold9.645       | 123031    | -              | 5   |                 | 70 TGACATCACAAATTTCAAATTTGG   | TCCATTCATTGATTGCTGA   | GGCCCTTCATGATCAGTGTT | GGAGAACCGTGGTCTGTCTT  | gRNA1-OFF16   |
| 18                                | CIRgRNA1-OFF17 | scaffold4.2924      | 93708     | -              | 5   |                 | 28 TCCTATCACACACTTCAAATGGAG   | AAATGTGGCCAAATTTGCT   | GTCCACCATGCTGATACT   | GGCCAAATTTGCTGAAAAGG  | gRNA1-OFF17   |
| 19                                | CIRgRNA1-OFF18 | scaffold1.1776      | 51589     | +              | 6   |                 | 26 AATCTCACAGCTTCCAATGGGG     | NA                    | NA                   | NA                    |               |
| <b>Cas9-gRNA1: Cas-OFFinder</b>   |                |                     |           |                |     |                 |                               |                       |                      |                       |               |
| 1                                 | CASgRNA1-OFF1  | chr3                | 107726661 | +              | 3   | -1              | ACAATCATAAACTTGAATGTGG        | GCAGGTTGGGGAGACTGAAC  | CAACCTACTGAACGGGACCG | TGCATATCCGACCAGAAACA  | gRNA1-OFF11   |
| 2                                 | CASgRNA1-OFF2  | chr3                | 123022309 | +              | 3   | -1              | ACAGTCACACACTTCCAAGAGG        | GGACAGTTTTTCCACCCCT   | CCTTCGTGAGCAAGCTACA  | GCACCACCAAGAGACCAAT   | gRNA1-OFF12   |
| <b>Cas9-gRNA2: CIRCLE-seq</b>     |                |                     |           |                |     |                 |                               |                       |                      |                       |               |
| 1                                 | CIRgRNA2-OFF1  | chr9                | 13588581  | +              | 6   |                 | 342 CGTTGGGCCAGATCCAGAGGCG    | NA                    | NA                   | NA                    |               |
| 2                                 | CIRgRNA2-OFF2  | chr7                | 89451810  | +              | 6   |                 | 294 CGTTGGGCCAGATCCAGAGGCG    | NA                    | NA                   | NA                    |               |
| 3                                 | CIRgRNA2-OFF3  | chr1                | 141204025 | -              | 4   | -1              | 278 CGGTGGCAGCAGATCCTGTGG     | TTTTACCCACGAGTCCAGT   | AGCCCTGACAAGGACGTCTA | TTCTTTGTCTCTCTCAGCA   | gRNA2-OFF1    |
| 4                                 | CIRgRNA2-OFF4  | chr5                | 97442353  | +              | 4   | -1              | 252 AA-TGGACACAGATCATGAGGAG   | NA                    | NA                   | NA                    |               |
| 5                                 | CIRgRNA2-OFF5  | chr10               | 20775888  | +              | 4   | -1              | 190 AA-TGGACACAGATCATGAGGAG   | NA                    | NA                   | NA                    |               |
| 6                                 | CIRgRNA2-OFF6  | chr4                | 3175346   | -              | 4   |                 | 176 AAGCGGCGTAGCTCCAGAGGGG    | NA                    | NA                   | NA                    |               |
| 7                                 | CIRgRNA2-OFF7  | chr4                | 111140164 | +              | 5   |                 | 158 TTGTAGTCGAGATCCTGAGCAG    | GTGCCAAAAGCAGCTTATCC  | TGCATATAGCCCAAAGATG  | GCCTTTGCTTGTGCGATAAT  | gRNA2-OFF2    |
| 8                                 | CIRgRNA2-OFF8  | chr9                | 77561370  | +              | 5   |                 | 154 CAGTAGGTGCAGATCCTGAGGAT   | TTGGTTGAGAGGGTTTCAGC  | CGGTCCATACCATGACACAG | GGTCCGTTTGGATTTGAGAA  | gRNA2-OFF3    |

## Activities and specificities of CRISPR-Cas9 and Cas12a nucleases for targeted mutagenesis in maize

**Table S4. List of off-targets identified by CIRCLE-seq and Cas-OFFinder.**

| Off-target | Chr.           | OFF-target position | Strand    | # mis-matches | Gap | CIRCLE-seq read | Off-target sequence     | F primer                | R primer              | Sequencing primer     | Sequencing ID         |             |
|------------|----------------|---------------------|-----------|---------------|-----|-----------------|-------------------------|-------------------------|-----------------------|-----------------------|-----------------------|-------------|
| 9          | CIRgRNA2-OFF9  | chr8                | 114426202 | +             | 7   | 132             | AAAGGGGCATAGATCCTGGTGGT | NA                      | NA                    | NA                    |                       |             |
| 10         | CIRgRNA2-OFF10 | chr3                | 80437794  | +             | 5   | 122             | AAGGGTCGTAGGTCATGAGTGG  | NA                      | NA                    | NA                    |                       |             |
| 11         | CIRgRNA2-OFF11 | chr1                | 71431596  | -             | 4   | 120             | AAGTGGGTACAGTTCATGAGGGG | NA                      | NA                    | NA                    |                       |             |
| 12         | CIRgRNA2-OFF12 | chr9                | 43647126  | -             | 7   | 118             | GCATGGGCGCAGATCATGGAGGT | NA                      | NA                    | NA                    |                       |             |
| 13         | CIRgRNA2-OFF13 | chr9                | 29274484  | +             | 6   | 114             | GCGTAGGCCAGATCATGAGGAG  | CATCGCGCCTTCTCATCTAT    | CTGGTGCCTTTTCCCTCTG   | TAATGAGTGGGACCCTCTGG  | gRNA2-OFF4            |             |
| 14         | CIRgRNA2-OFF14 | chr5                | 65412390  | -             | 7   | 96              | TCCTGGGTGCAGACCCTGCGGAG | NA                      | NA                    | NA                    |                       |             |
| 15         | CIRgRNA2-OFF15 | chr7                | 13681611  |               | 3   | -1              | 92                      | TTGTGGGGCAGATC-TGAGCGG  | CCTTCCCTCTTCTGGTCTCC  | AGGATCCGCATCTCCTTCTT  | CGCTCTCAGATCCCTCTCC   | gRNA2-OFF5  |
| 16         | CIRgRNA2-OFF16 | chr4                | 89100310  | -             | 4   | 90              | AAGCGGTGCAGAACATGAGAGG  | TTTATCAGTTCGGGTCGAT     | GAAAGCTCCCTCGGAACTC   | GCTCAAGCCACGATGTATCA  | gRNA2-OFF6            |             |
| 17         | Target         | chr2                | 8112430   | -             | 0   | 86              | AAGTGGGCGCAGATCCTGAGCGG | CACAGCCTTGCAATCAATTC    | GCTGACGTGGAAGGAGTAGC  | ACACCGTGTCTTCGTCAAAA  |                       |             |
| 18         | CIRgRNA2-OFF17 | chr9                | 53910322  | -             | 4   | 80              | AGGGGGTGCAGATCGTGAAGG   | GCCTGCTTAGCTCGCATG      | TCAAGTCTCCCGTGGAGTT   | CATACTTGCCCGCATCTAT   | gRNA2-OFF7            |             |
| 19         | CIRgRNA2-OFF18 | chr4                | 131654621 | -             | 4   | 74              | TAGTGGGCACGGATCCCGAGTGG | NA                      | NA                    | NA                    |                       |             |
| 20         | CIRgRNA2-OFF19 | chr8                | 124038726 | -             | 7   | 72              | TTGTAGGGACAGATCCTGACGGC | CCAAAAGGGGTGGAGTTT      | CCGTTTACAGTAGGAGCATT  | TGGCCAGGCCTTATTTGTTA  | gRNA2-OFF8            |             |
| 21         | CIRgRNA2-OFF20 | chr10               | 10741673  | -             | 4   | -1              | 68                      | ATGTGGGCACAGATCCAT-GGGG | NA                    | NA                    | NA                    |             |
| 22         | CIRgRNA2-OFF21 | chr5                | 99843540  | +             | 4   | -1              | 64                      | AGGTAGGCTCAGATCCT-ATTGG | TCTGATGATGGCATTCTCTGA | GCTTTAGCACCTGGAAAGCA  | GAGAAGCATTCGTTTATTGTC | gRNA2-OFF9  |
| 23         | CIRgRNA2-OFF22 | chr2                | 143394415 | +             | 4   | -1              | 60                      | GTGGAGGCGCAGATCCTG-GAGG | NA                    | NA                    | NA                    |             |
| 24         | CIRgRNA2-OFF23 | chr8                | 3233767   | -             | 5   | 58              | GTGTGGGTGCATATCCTGACGGG | NA                      | NA                    | NA                    |                       |             |
| 25         | CIRgRNA2-OFF24 | chr4                | 102327148 | +             | 6   | 52              | AGTTGGACGCGGAGCCTGAGGAG | CAGGGTTATTGGTGGGAGTG    | ACTACTCGCGGATGGAGTTG  | AAGAGGGACCATCTGCTGTG  | gRNA2-OFF10           |             |
| 26         | CIRgRNA2-OFF25 | chr4                | 120978466 | +             | 3   | -1              | 48                      | AA-TGGGTGCAATCCTGGGAGG  | GGGAGTGTACGCAACTCTCTA | TGGCTGCTTACTACTGTAC   | TGGGGTATTGGTTTATCC    | gRNA2-OFF11 |
| 27         | CIRgRNA2-OFF26 | chr8                | 35653730  | -             | 7   | 48              | CTGTGGGCACAGATCCATGGGGA | NA                      | NA                    | NA                    |                       |             |
| 28         | CIRgRNA2-OFF27 | chr5                | 71309072  | -             | 6   | 46              | TTGTGGACACAGATCCCTAGGGG | NA                      | NA                    | NA                    |                       |             |
| 29         | CIRgRNA2-OFF28 | chr10               | 2615234   | -             | 5   | 44              | AGCGGGCACAGTCTGAGGGG    | GGTTTGCAGAGTGGTACT      | CCAGGATGGCTATGAAGCTC  | GTGAAGTCCCTGGACGAATG  | gRNA2-OFF12           |             |
| 30         | CIRgRNA2-OFF29 | chr3                | 37735259  |               | 4   | -1              | 44                      | CAGTGGGTGCCAATCCT-AGTGG | TTTGCAGCCTCGTGTGCTA   | TCCAAGTCCACACTCTOCT   | CAACCATGCCACATGAGTA   | gRNA2-OFF13 |
| 31         | CIRgRNA2-OFF30 | chr8                | 45766735  |               | 3   | -1              | 40                      | GAGAGGGGCAGATCC-GAGCGG  | NA                    | NA                    | NA                    |             |
| 32         | CIRgRNA2-OFF31 | chr3                | 22392038  | +             | 4   | 38              | AAGTGGGCAGATTCATGAGGGG  | NA                      | NA                    | NA                    |                       |             |
| 33         | CIRgRNA2-OFF32 | chr3                | 77520472  | -             | 7   | 34              | TCGTGAGTCCAGATCCTGACGGC | AATTTTGGTTTCTCGGATCG    | ATACCCCTCCGTTTGTCT    | TCGGATCGCGTACTACTACA  | gRNA2-OFF14           |             |
| 34         | CIRgRNA2-OFF33 | chr5                | 104806341 | -             | 3   | 34              | TAGTGGGCGCGAGCCTGAGTGG  | NA                      | NA                    | NA                    |                       |             |
| 35         | CIRgRNA2-OFF34 | chr5                | 34959898  | -             | 4   | 34              | AAGTAGGCGGAGTTCATGAGGGG | NA                      | NA                    | NA                    |                       |             |
| 36         | CIRgRNA2-OFF35 | chr8                | 28495318  | -             | 5   | 34              | AGGTGGGCATAGATGCTGAGGCG | NA                      | NA                    | NA                    |                       |             |
| 37         | CIRgRNA2-OFF36 | chr10               | 31243099  | -             | 3   | 32              | AAGTGGGCGCAGTCTCGGCGG   | NA                      | NA                    | NA                    |                       |             |
| 38         | CIRgRNA2-OFF37 | chr4                | 146758923 | -             | 3   | -1              | 32                      | AGGAGGGCGCAGATC-TGATGGG | NA                    | NA                    | NA                    |             |
| 39         | CIRgRNA2-OFF38 | chr5                | 122305522 | +             | 4   | -1              | 32                      | ATGTGAGGGCAGATCCCG-GCGG | GCTAATAAATTTCCCGCAACG | TGGATAGACTGGACTGGATGG | GAGACCGACGGACCTGTAAA  | gRNA2-OFF15 |
| 40         | CIRgRNA2-OFF39 | chr9                | 44365953  | +             | 4   | 32              | TAGCGGGCGGAGATCCTGCGGGG | NA                      | NA                    | NA                    |                       |             |
| 41         | CIRgRNA2-OFF40 | chr3                | 33755704  | +             | 3   | 30              | TAGTGGGCGCGAGCCTGAGTGG  | NA                      | NA                    | NA                    |                       |             |
| 42         | CIRgRNA2-OFF41 | chr4                | 31939351  |               | 4   | -1              | 30                      | CAGTGGGCAAGATC-TGAGCGG  | NA                    | NA                    | NA                    |             |
| 43         | CIRgRNA2-OFF42 | chr1                | 72856206  | -             | 3   | 28              | TAGTGGGCGCGGAGCCTGAGTGG | NA                      | NA                    | NA                    |                       |             |
| 44         | CIRgRNA2-OFF43 | chr5                | 126727666 | -             | 2   | 28              | TAGTGGGCGCAGACCTGAGTGG  | NA                      | NA                    | NA                    |                       |             |
| 45         | CIRgRNA2-OFF44 | chr7                | 46673844  | +             | 4   | -1              | 28                      | TA-TGGGCACGGATCCTGGGTGG | NA                    | NA                    | NA                    |             |



## Activities and specificities of CRISPR-Cas9 and Cas12a nucleases for targeted mutagenesis in maize

**Table S4. List of off-targets identified by CIRCLE-seq and Cas-OFFinder.**

| Off-target                      | Chr.           | OFF-target position | Strand   | # mis-matches | Gap | CIRCLE-seq read | Off-target sequence     | F primer                | R primer             | Sequencing primer     | Sequencing ID       |             |
|---------------------------------|----------------|---------------------|----------|---------------|-----|-----------------|-------------------------|-------------------------|----------------------|-----------------------|---------------------|-------------|
| 46                              | CIRgRNA2-OFF45 | chr1                | 42186271 | +             | 3   | 26              | TAGTGGGCGCGGATCCCGAGTGG | NA                      | NA                   | NA                    |                     |             |
| 47                              | CIRgRNA2-OFF46 | chr6                | 3885198  | -             | 5   | 24              | CGGTCGGCGCAGATCCGAAGGG  | AGCTCAGGTACACGCTGCTC    | CGGGTCTTTCTGGTCTTCAA | GAGCTCAAACGCTTCGCTAT  | gRNA2-OFF16         |             |
| 48                              | CIRgRNA2-OFF47 | chr6                | 19911665 | -             | 4   | 22              | AAGTGGGCGAGATTCATGAGGG  | NA                      | NA                   | NA                    |                     |             |
| 49                              | CIRgRNA2-OFF48 | chr8                | 78599198 | +             | 3   | 22              | TAGTGGGCGCGGAGCCTGAGTGG | NA                      | NA                   | NA                    |                     |             |
| 50                              | CIRgRNA2-OFF49 | scaffold5.1481      | 2130     | +             | 5   | 290             | ATATGGGAGAAGATCCTGAGGGT | TCACGAAAGGAACGAAAGGT    | TTTTCCATGGAGCCAGATTC | CGATGAGCACCAGTCATTGT  | gRNA2-OFF19         |             |
| 51                              | CIRgRNA2-OFF50 | scaffold7.1524      | 51025    | +             | 6   | 168             | TGGTGGGCCAGATCATGATGGA  | NA                      | NA                   | NA                    |                     |             |
| 52                              | CIRgRNA2-OFF51 | scaffold5.1556      | 182655   | +             | 7   | 134             | CCGAGGGCGCAAATCCTGGTGGT | NA                      | NA                   | NA                    |                     |             |
| 53                              | CIRgRNA2-OFF52 | scaffold5.1846      | 47657    | +             | 6   | 100             | GAGGGGGCGCAGCTCCTAGGGGC | NA                      | NA                   | NA                    |                     |             |
| 54                              | CIRgRNA2-OFF53 | scaffold1.2368      | 3376     | +             | 7   | 58              | CTCAAGGCGCAGATCGTGAGCG  | NA                      | NA                   | NA                    |                     |             |
| 55                              | CIRgRNA2-OFF54 | scaffold7.2180      | 31663    | -             | 4   | -1              | 58                      | TTGAGGGCGCAGATC-TGTGAGG | GTGTCCCTGTTTCCATGACC | ACATAGCCCTCCCTAGCAT   | GGGTGTTAGGGAGGAGAAG | gRNA2-OFF20 |
| 56                              | CIRgRNA2-OFF55 | scaffold7.857       | 39835    | -             | 7   | 56              | CTGTGGACACAGATCCTTGGGGA | NA                      | NA                   | NA                    |                     |             |
| 57                              | CIRgRNA2-OFF56 | scaffold7.361       | 17864    | +             | 4   | 54              | TAGTGGGCGCGGATCCCAAGTGG | NA                      | NA                   | NA                    |                     |             |
| 58                              | CIRgRNA2-OFF57 | scaffold5.414       | 18095    | +             | 6   | 52              | GCGGAGGCGCAGATCCCGAGCAG | NA                      | NA                   | NA                    |                     |             |
| 59                              | CIRgRNA2-OFF58 | scaffold7.575       | 108704   | +             | 4   | 42              | AAGTGGACGGAGCTCATGAGGGG | NA                      | NA                   | NA                    |                     |             |
| 60                              | CIRgRNA2-OFF59 | scaffold1.3684      | 8306     | +             | 3   | 36              | AAGTGGGCGGAGTTCATGAGGGG | NA                      | NA                   | NA                    |                     |             |
| 61                              | CIRgRNA2-OFF60 | scaffold9.2352      | 20721    | -             | 7   | 36              | TTGCAGGCGAAGACCCTGAGCAG | NA                      | NA                   | NA                    |                     |             |
| 62                              | CIRgRNA2-OFF61 | scaffold10.306      | 139567   | -             | 6   | 34              | GAATGGACACAGATCCTGAGGAG | NA                      | NA                   | NA                    |                     |             |
| 63                              | CIRgRNA2-OFF62 | scaffold4.1476      | 188749   | +             | 7   | 32              | ATGTGGACACAGATCCATGGGGA | NA                      | NA                   | NA                    |                     |             |
| 64                              | CIRgRNA2-OFF63 | scaffold3.2145      | 3787     | +             | 6   | 30              | GAGGGAGCGCAGATCACGGGGG  | NA                      | NA                   | NA                    |                     |             |
| 65                              | CIRgRNA2-OFF64 | scaffold3.903       | 101030   | +             | 3   | 30              | TAGTGGGCGCAGAGCCCGAGTGG | NA                      | NA                   | NA                    |                     |             |
| 66                              | CIRgRNA2-OFF65 | scaffold4.843       | 7341     | +             | 4   | 28              | AAGTGGGCGAGTTCATGAGGGG  | NA                      | NA                   | NA                    |                     |             |
| 67                              | CIRgRNA2-OFF66 | scaffold5.1936      | 55512    | +             | 4   | 28              | AAGTGGGCGAGTTCATGAGGGG  | NA                      | NA                   | NA                    |                     |             |
| 68                              | CIRgRNA2-OFF67 | scaffold2.1507      | 228125   | +             | 4   | -1              | 26                      | GTGAGGAGCAGATC-TGAGCGG  | NA                   | NA                    | NA                  |             |
| <b>Cas9-gRNA2: Cas-OFFinder</b> |                |                     |          |               |     |                 |                         |                         |                      |                       |                     |             |
| 1                               | CASgRNA2-OFF1  | chr1                | 35799146 | -             | 2   | -1              | ACGTGGGCGCAATCCTGCGCGG  | TAGGCAGACAATGAGCCAAA    | TAGATCGAGAAGGCGTCTG  | CCAAACTAACCTGAGCGATCT | gRNA2-OFF17         |             |
| 2                               | CASgRNA2-OFF2  | chr1                | 73355715 | +             | 2   | -1              | ATGTGGGCGCAATCCTGCGTGG  | NA                      | NA                   | NA                    |                     |             |
| 3                               | CASgRNA2-OFF3  | chr1                | 93320177 | -             | 2   | -1              | ACGTGGGCGCAATCCTGCGCGG  | NA                      | NA                   | NA                    |                     |             |
| 4                               | CASgRNA2-OFF4  | chr10               | 31243108 | -             | 3   |                 | AAGTGGGCGCAGTCTCTGGCGG  | CCGCAGATAAGACACTGACG    | GTGACGTGGAAGGAGAAGGA | CAAGACGAGTGTCTGCTAA   | gRNA2-OFF18         |             |
| 5                               | CASgRNA2-OFF5  | chr1                | 73355694 | -             | 2   | -1              | ATGTGGGCGCAATCCTGCGTGG  | NA                      | NA                   | NA                    |                     |             |
